# Supplementary material for: Exploring Transcriptional Regulation of Beta Cell SASP by Brd4-Associated Proteins and Cell Cycle Control Protein p21
Source: MDPI journal article supplement (doi:10.3390/epigenomes8010010), 2024-03-06
Supplement: s1 [file s1]

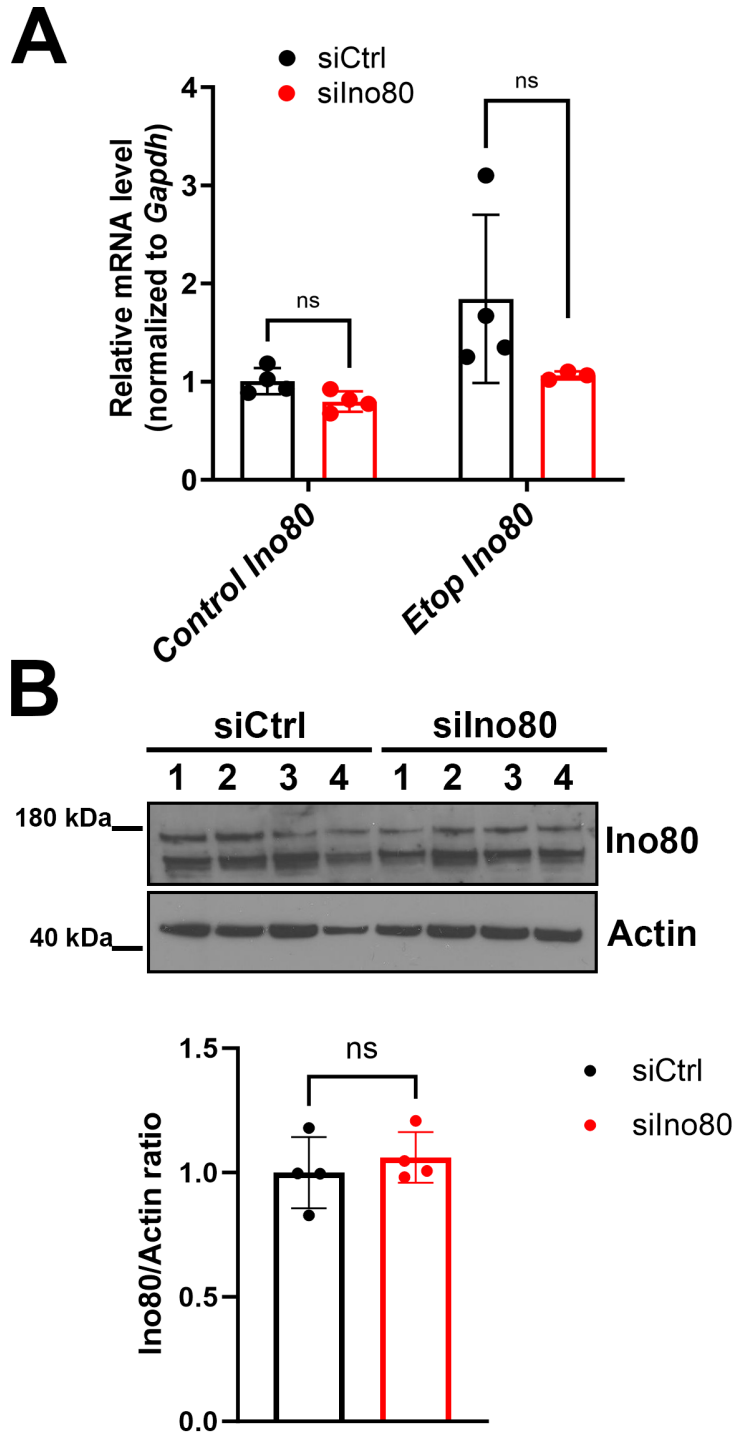

**Figure S1. RNAi knockdown of *Ino80* in NIT-1 cells.** Control or senescent NIT-1 cells were transfected with control or *Ino80* siRNAs at 72 h post-etoposide or vehicle (DMSO) treatment. Cells were harvested 24 h after transfection for analysis of *Ino80* mRNA by qRT-PCR (A) or *Ino80* protein by western blot (B). Cells transfected with *Ino80* siRNAs did not show significant reduction of *Ino80* mRNA or protein levels. Data are means and error bars are S.D. ns = not significant by two-tailed T-tests.
