# Supplementary material for: Exploring Transcriptional Regulation of Beta Cell SASP by Brd4-Associated Proteins and Cell Cycle Control Protein p21
Source: Epigenomes. 2024 Mar 6;8(1):10. doi: 10.3390/epigenomes8010010 (PMC10968907; doi:10.3390/epigenomes8010010)
Supplement: Supplementary file 1 [file epigenomes-08-00010-s001.zip › Table S1.xlsx]

## Sheet: Brd4 IP 1
Protein FDR Confidence: Combined	Accession	Description	Sum PEP Score	Coverage [%]	# Peptides	# PSMs	# Unique Peptides	# Protein Groups	# AAs	MW [kDa]	calc. pI	Score Sequest HT: Sequest HT	# Peptides (by Search Engine): Sequest HT
High	E9Q7G0	Nuclear mitotic apparatus protein 1 OS=Mus musculus OX=10090 GN=Numa1 PE=1 SV=1	348.512	62	105	201	72	1	2094	235.5	5.87	560.29	105
High	E9PVX6	Proliferation marker protein Ki-67 OS=Mus musculus OX=10090 GN=Mki67 PE=1 SV=1	201.243	35	83	117	83	1	3177	350.7	9.72	247.54	83
High	Q80WE4	Kinesin-like protein KIF20B OS=Mus musculus OX=10090 GN=Kif20b PE=1 SV=3	134.626	37	54	70	54	1	1774	203.4	5.78	163.62	54
High	F6ZQA3	Nuclear mitotic apparatus protein 1 (Fragment) OS=Mus musculus OX=10090 GN=Numa1 PE=1 SV=1	126.085	60	34	75	1	1	741	82.8	9.44	191.13	34
High	A0A068BFR6	Kinesin-like protein OS=Mus musculus OX=10090 GN=Kifc1 PE=2 SV=1	114.55	54	35	67	5	1	674	74.1	8.72	168.72	35
High	Q3UH70	Bromodomain-containing protein 4 OS=Mus musculus OX=10090 GN=Brd4 PE=1 SV=1	114.345	29	36	85	28	1	1401	156	9.2	203.85	36
High	E9PUA5	Kinesin-like protein OS=Mus musculus OX=10090 GN=Kifc5b PE=1 SV=1	105.177	52	34	61	2	1	672	73.6	8.81	142.94	34
High	Q571G8	MKIAA1649 protein (Fragment) OS=Mus musculus OX=10090 GN=Poldip3 PE=2 SV=1	100.977	58	25	68	3	1	453	49.7	10.42	175.63	25
High	Q3UDD3	Polymerase delta-interacting protein 3 OS=Mus musculus OX=10090 GN=Poldip3 PE=1 SV=1	90.65	62	23	61	1	1	391	42.9	9.98	160.57	23
High	Q01320	DNA topoisomerase 2-alpha OS=Mus musculus OX=10090 GN=Top2a PE=1 SV=2	84.15	29	40	47	40	1	1528	172.7	8.6	88.54	40
High	Q5BJ94	Kifc1 protein OS=Mus musculus OX=10090 GN=Kifc1 PE=2 SV=1	57.687	45	25	42	1	1	497	55	8.32	93.6	25
High	Q6ZPW1	MKIAA1196 protein (Fragment) OS=Mus musculus OX=10090 GN=Zfp512b PE=2 SV=1	45.134	21	14	20	14	1	883	96.5	9.76	48.3	14
High	A0A0R4J1A6	GAS2-like protein 3 OS=Mus musculus OX=10090 GN=Gas2l3 PE=1 SV=1	43.864	35	17	23	17	1	683	74.2	9.6	53.56	17
High	A2APB8	Targeting protein for Xklp2 OS=Mus musculus OX=10090 GN=Tpx2 PE=1 SV=1	43.596	39	25	31	25	1	745	85.8	9.38	36.67	25
High	Q52L97	Importin subunit alpha OS=Mus musculus OX=10090 GN=Kpna2 PE=1 SV=1	41.144	36	14	16	14	1	529	57.9	5.68	45.97	14
High	Q3V1H1	Cytoskeleton-associated protein 2 OS=Mus musculus OX=10090 GN=Ckap2 PE=1 SV=1	37.379	31	16	21	16	1	664	74	9.23	33.35	16
High	Q8VIJ6	Splicing factor, proline- and glutamine-rich OS=Mus musculus OX=10090 GN=Sfpq PE=1 SV=1	34.038	21	13	15	12	1	699	75.4	9.44	37.89	13
High	P43275	Histone H1.1 OS=Mus musculus OX=10090 GN=H1-1 PE=1 SV=2	33.235	31	8	28	6	1	213	21.8	10.93	71.24	8
High	Q3TW77	Uncharacterized protein OS=Mus musculus OX=10090 GN=Grn PE=2 SV=1	31.473	24	8	12	8	1	602	65	6.99	40.9	8
High	Q7TS74	Cytoskeleton-associated protein 2-like OS=Mus musculus OX=10090 GN=Ckap2l PE=1 SV=1	30.641	30	17	18	17	1	745	82.9	9.69	29.14	17
High	E9QMP6	Non-specific serine/threonine protein kinase OS=Mus musculus OX=10090 GN=Mark2 PE=1 SV=2	30.1	22	12	14	12	1	776	86.3	9.67	22.01	12
High	Q32P04	Keratin 5 OS=Mus musculus OX=10090 GN=Krt5 PE=1 SV=2	29.921	21	17	19	5	1	580	61.7	7.75	32.31	17
High	Q3UXP2	RuvB-like helicase OS=Mus musculus OX=10090 GN=Ruvbl2 PE=2 SV=1	27.092	30	12	13	12	1	463	51.1	5.64	26.29	12
High	Q7TPV4	Myb-binding protein 1A OS=Mus musculus OX=10090 GN=Mybbp1a PE=1 SV=2	25.341	14	14	15	14	1	1344	151.9	8.95	27.73	14
High	Q9ERH4	Nucleolar and spindle-associated protein 1 OS=Mus musculus OX=10090 GN=Nusap1 PE=1 SV=1	24.817	34	13	15	13	1	427	48.5	9.89	25.15	13
High	Q68FG3	Protein SPT2 homolog OS=Mus musculus OX=10090 GN=Spty2d1 PE=2 SV=1	23.807	21	14	15	14	1	682	74.8	9.76	18.23	14
High	Q3UK83	Helix-destabilizing protein OS=Mus musculus OX=10090 GN=Hnrnpa1 PE=2 SV=1	22.577	24	8	12	7	1	373	38.8	9.13	18.72	8
High	P50446	Keratin, type II cytoskeletal 6A OS=Mus musculus OX=10090 GN=Krt6a PE=1 SV=3	22.38	18	12	14	1	1	553	59.3	7.94	29.45	12
High	P20029	Endoplasmic reticulum chaperone BiP OS=Mus musculus OX=10090 GN=Hspa5 PE=1 SV=3	22.135	21	10	13	8	1	655	72.4	5.16	23.31	10
High	A0A2R8VHW4	Bromodomain-containing protein 4 (Fragment) OS=Mus musculus OX=10090 GN=Brd4 PE=1 SV=1	22.006	51	5	19	1	1	169	18.7	9.95	41.82	5
High	Q3V0Z8	DEAD box protein 5 (Fragment) OS=Mus musculus OX=10090 GN=Ddx5 PE=2 SV=1	20.812	16	11	16	8	1	690	76.7	8.6	19.08	11
High	P63017	Heat shock cognate 71 kDa protein OS=Mus musculus OX=10090 GN=Hspa8 PE=1 SV=1	20.77	16	9	12	7	1	646	70.8	5.52	20.76	9
High	Q8C2Q3	RNA-binding protein 14 OS=Mus musculus OX=10090 GN=Rbm14 PE=1 SV=1	20.275	17	9	10	9	1	669	69.4	9.67	19.66	9
High	Q3U1C2	RuvB-like helicase OS=Mus musculus OX=10090 GN=Ruvbl1 PE=1 SV=1	20.124	30	10	11	10	1	456	50.2	6.42	25.6	10
High	Q3TVV6	Uncharacterized protein OS=Mus musculus OX=10090 GN=Hnrnpu PE=2 SV=1	19.48	20	10	10	10	1	800	87.9	6.24	15.95	10
High	Q9QWL7	Keratin, type I cytoskeletal 17 OS=Mus musculus OX=10090 GN=Krt17 PE=1 SV=3	19.465	19	10	11	4	1	433	48.1	5.06	21.39	10
High	P04104	Keratin, type II cytoskeletal 1 OS=Mus musculus OX=10090 GN=Krt1 PE=1 SV=4	17.399	7	9	12	1	1	637	65.6	8.15	29.12	9
High	Q8BGZ7	Keratin, type II cytoskeletal 75 OS=Mus musculus OX=10090 GN=Krt75 PE=1 SV=1	17.187	14	10	12	1	1	551	59.7	8.31	22.61	10
High	Q8C852	Uncharacterized protein OS=Mus musculus OX=10090 GN=Dcx PE=2 SV=1	16.645	21	7	7	7	1	379	42.5	9.72	11.08	7
High	P15864	Histone H1.2 OS=Mus musculus OX=10090 GN=H1-2 PE=1 SV=2	15.464	25	6	14	3	1	212	21.3	11	33.33	6
High	Q8CJF7	Protein ELYS OS=Mus musculus OX=10090 GN=Ahctf1 PE=1 SV=1	14.861	5	8	8	8	1	2243	247.5	6.55	13.36	8
High	A0A097PUG4	Anti-lox-1 15C4 light chain OS=Mus musculus OX=10090 PE=2 SV=1	14.755	28	4	6	4	1	238	25.9	4.94	13.01	4
High	Q6IFX2	Keratin, type I cytoskeletal 42 OS=Mus musculus OX=10090 GN=Krt42 PE=1 SV=1	14.221	18	9	11	5	1	452	50.1	5.16	16.07	9
High	Q04750	DNA topoisomerase 1 OS=Mus musculus OX=10090 GN=Top1 PE=1 SV=2	13.599	13	9	10	9	1	767	90.8	9.33	9.42	9
High	P05213	Tubulin alpha-1B chain OS=Mus musculus OX=10090 GN=Tuba1b PE=1 SV=2	13.066	18	7	8	7	1	451	50.1	5.06	6.95	7
High	P97477-2	Isoform 2 of Aurora kinase A OS=Mus musculus OX=10090 GN=Aurka	12.701	16	6	6	6	1	417	47.1	9.36	8.72	6
High	G5E8E3	RIKEN cDNA 2310022A10 gene OS=Mus musculus OX=10090 GN=2310022A10Rik PE=1 SV=1	12.547	22	8	8	8	1	413	44.4	10.26	7.78	8
High	Q1WWK3	Hist1h1b protein (Fragment) OS=Mus musculus OX=10090 GN=H1f5 PE=2 SV=1	12.124	23	5	14	5	1	222	22.4	10.92	35.1	5
High	G3UWQ7	Protein regulator of cytokinesis 1 OS=Mus musculus OX=10090 GN=Prc1 PE=1 SV=1	11.87	13	5	5	5	1	620	72	7.75	12.68	5
High	Q3TF40	Uncharacterized protein (Fragment) OS=Mus musculus OX=10090 GN=Nono PE=2 SV=1	11.801	11	6	6	5	1	528	60.4	9.61	11.02	6
High	Q7JJ13	Bromodomain-containing protein 2 OS=Mus musculus OX=10090 GN=Brd2 PE=1 SV=1	11.17	4	5	8	1	1	798	88	9.13	12.34	5
High	Q80ZM5	H1 histone family, member X OS=Mus musculus OX=10090 GN=H1f10 PE=1 SV=1	10.545	22	4	7	4	1	188	20.1	11.22	16.65	4
High	Q9WV02	RNA-binding motif protein, X chromosome OS=Mus musculus OX=10090 GN=Rbmx PE=1 SV=1	10.374	15	5	5	5	1	391	42.3	10.05	4.3	5
High	B2RRX1	Actin, beta OS=Mus musculus OX=10090 GN=Actb PE=2 SV=1	10.352	20	6	7	6	1	375	41.7	5.48	2.19	6
High	Q9DB79	40S ribosomal protein S11 OS=Mus musculus OX=10090 GN=Rps11 PE=2 SV=1	10.23	34	5	6	5	1	166	19.4	10.14	8.49	5
High	O08583	THO complex subunit 4 OS=Mus musculus OX=10090 GN=Alyref PE=1 SV=3	9.938	18	4	6	4	1	255	26.9	11.15	9.12	4
High	P51881	ADP/ATP translocase 2 OS=Mus musculus OX=10090 GN=Slc25a5 PE=1 SV=3	9.751	19	6	6	6	1	298	32.9	9.73	6.8	6
High	Q9EQD6	Keratin intermediate filament 16a OS=Mus musculus OX=10090 GN=K16 PE=3 SV=1	9.612	9	5	7	2	1	474	52	5.2	9.69	5
High	Q3U741	RNA helicase OS=Mus musculus OX=10090 GN=Ddx17 PE=1 SV=1	9.504	11	6	7	3	1	652	72.5	8.68	7.67	6
High	Q3TIQ2	60S ribosomal protein L12 OS=Mus musculus OX=10090 GN=Rpl12 PE=2 SV=1	9.494	43	5	5	5	1	165	17.8	9.42	10.66	5
High	B1AVB1	Scm polycomb group protein-like 2 OS=Mus musculus OX=10090 GN=Scml2 PE=1 SV=1	9.482	9	4	6	4	1	825	89.5	9.23	7.05	4
High	P97351	40S ribosomal protein S3a OS=Mus musculus OX=10090 GN=Rps3a PE=1 SV=3	9.187	22	4	4	4	1	264	29.9	9.73	4.5	4
High	P43274	Histone H1.4 OS=Mus musculus OX=10090 GN=H1-4 PE=1 SV=2	9.103	15	4	11	1	1	219	22	11.11	22.96	4
High	O88569	Heterogeneous nuclear ribonucleoproteins A2/B1 OS=Mus musculus OX=10090 GN=Hnrnpa2b1 PE=1 SV=2	8.709	14	5	5	4	1	353	37.4	8.95	6.64	5
High	Q3UZG3	Uncharacterized protein OS=Mus musculus OX=10090 GN=Hnrnpa3 PE=2 SV=1	8.683	18	4	5	1	1	379	39.7	9.1	11.41	4
High	Q3TKD1	AAA domain-containing protein OS=Mus musculus OX=10090 GN=Rfc3 PE=1 SV=1	8.187	17	4	4	4	1	356	40.5	8.38	7.36	4
High	Q9ERR1	Nuclear distribution protein nudE-like 1 OS=Mus musculus OX=10090 GN=Ndel1 PE=1 SV=2	8.113	14	5	6	5	1	345	38.3	5.24	6.53	5
High	P35550	rRNA 2'-O-methyltransferase fibrillarin OS=Mus musculus OX=10090 GN=Fbl PE=1 SV=2	8.068	13	4	4	4	1	327	34.3	10.24	7.23	4
High	Q3UW40	TRASH domain-containing protein OS=Mus musculus OX=10090 GN=Rpl24 PE=2 SV=1	7.91	22	4	4	4	1	160	18.2	11.05	2.12	4
High	Q8K298	Anillin OS=Mus musculus OX=10090 GN=Anln PE=1 SV=2	7.692	6	4	4	4	1	1121	122.7	6.98	7.1	4
High	Q8BG05-2	Isoform 2 of Heterogeneous nuclear ribonucleoprotein A3 OS=Mus musculus OX=10090 GN=Hnrnpa3	7.566	19	4	5	1	1	357	37.1	8.31	8.64	4
High	P10922	Histone H1.0 OS=Mus musculus OX=10090 GN=H1-0 PE=2 SV=4	7.207	11	2	4	2	1	194	20.8	10.9	6.25	2
High	Q3UV17	Keratin, type II cytoskeletal 2 oral OS=Mus musculus OX=10090 GN=Krt76 PE=1 SV=1	7.128	5	4	6	1	1	594	62.8	8.43	10.48	4
High	A0A0G2JFH2	Microtubule-associated protein (Fragment) OS=Mus musculus OX=10090 GN=Map4 PE=1 SV=1	6.961	3	4	4	4	1	1441	152.7	9.28	4.26	4
High	C0HKE5	Histone H2A type 1-G OS=Mus musculus OX=10090 GN=H2ac11 PE=1 SV=1	6.953	22	2	2	1	1	130	14.1	11.05	4.99	2
High	Q3TL53	40S ribosomal protein S6 OS=Mus musculus OX=10090 PE=2 SV=1	6.892	16	4	4	4	1	249	28.7	10.77	5.9	4
High	B2RWX2	C4a anaphylatoxin OS=Mus musculus OX=10090 GN=C4b PE=2 SV=1	6.71	2	2	2	2	1	1738	192.8	7.47	8.38	2
High	Q8R326	Paraspeckle component 1 OS=Mus musculus OX=10090 GN=Pspc1 PE=1 SV=1	6.663	6	3	3	3	1	523	58.7	6.67	5.54	3
High	Q3UJI2	WD_REPEATS_REGION domain-containing protein OS=Mus musculus OX=10090 GN=Rbbp7 PE=2 SV=1	6.605	5	2	2	2	1	425	47.7	5.05	2.88	2
High	V9GWY0	40S ribosomal protein S4 OS=Mus musculus OX=10090 GN=Gm15013 PE=3 SV=1	6.547	15	4	4	4	1	266	29.9	9.99	6.02	4
High	Q9CY57	Chromatin target of PRMT1 protein OS=Mus musculus OX=10090 GN=Chtop PE=1 SV=2	6.523	10	2	3	2	1	249	26.6	12.23	7.11	2
High	Q69Z99	Zinc finger protein 512 OS=Mus musculus OX=10090 GN=Znf512 PE=2 SV=2	6.363	8	3	3	3	1	562	63.9	9.51	5.85	3
High	Q3UI84	Replication factor C subunit 4 OS=Mus musculus OX=10090 GN=Rfc4 PE=1 SV=1	6.334	11	4	4	4	1	370	40.9	8.53	1.85	4
High	Q5BLJ7	40S ribosomal protein S13 OS=Mus musculus OX=10090 GN=Rps13 PE=1 SV=1	6.287	27	4	4	4	1	151	17.2	10.54	3.56	4
High	Q61782	Type I epidermal keratin mRNA, 3'end (Fragment) OS=Mus musculus OX=10090 PE=2 SV=1	6.208	33	2	2	1	1	93	10.7	6.3	5.27	2
High	E9QNP0	60S ribosomal protein L40 OS=Mus musculus OX=10090 GN=Kxd1 PE=1 SV=1	6.005	12	3	4	3	1	232	26.8	9.83	5.85	3
High	E9QNN1	DEAH box protein 9 OS=Mus musculus OX=10090 GN=Dhx9 PE=1 SV=1	5.879	3	4	4	4	1	1384	149.6	6.83	3.9	4
High	P10126	Elongation factor 1-alpha 1 OS=Mus musculus OX=10090 GN=Eef1a1 PE=1 SV=3	5.8	8	3	3	3	1	462	50.1	9.01	2.6	3
High	A0A1S6GWJ4	RNA helicase OS=Mus musculus OX=10090 GN=Ddx41 PE=1 SV=1	5.643	7	4	4	4	1	633	71.1	6.83	1.73	4
High	A2A7B5	PR domain-containing 2, with ZNF domain OS=Mus musculus OX=10090 GN=Prdm2 PE=1 SV=1	5.568	3	3	3	3	1	1709	187.1	8	1.98	3
High	A0A140T8T4	60S ribosomal protein L9 OS=Mus musculus OX=10090 GN=Rpl9-ps6 PE=3 SV=1	5.52	19	3	3	3	1	192	21.8	9.88	6.3	3
High	Q6ZPV2	Chromatin-remodeling ATPase INO80 OS=Mus musculus OX=10090 GN=Ino80 PE=1 SV=2	5.473	2	3	3	3	1	1559	176.4	9.36	5.09	3
High	P61358	60S ribosomal protein L27 OS=Mus musculus OX=10090 GN=Rpl27 PE=1 SV=2	5.368	36	4	4	4	1	136	15.8	10.56	3.7	4
High	Q9D1H9	Microfibril-associated glycoprotein 4 OS=Mus musculus OX=10090 GN=Mfap4 PE=1 SV=1	5.318	7	1	1	1	1	257	28.9	5.44	4.23	1
High	Q8C671	Serine/arginine-rich splicing factor 2 OS=Mus musculus OX=10090 GN=Srsf2 PE=2 SV=1	5.304	10	3	3	3	1	254	29	11.22	4.73	3
High	Q8R080	G2 and S phase-expressed protein 1 OS=Mus musculus OX=10090 GN=Gtse1 PE=1 SV=2	5.244	5	3	3	3	1	741	78.7	9.39	4.83	3
High	P63325	40S ribosomal protein S10 OS=Mus musculus OX=10090 GN=Rps10 PE=1 SV=1	5.116	13	2	3	2	1	165	18.9	10.15	6.25	2
High	Q8C2Q7	Heterogeneous nuclear ribonucleoprotein H OS=Mus musculus OX=10090 GN=Hnrnph1 PE=1 SV=1	5.11	7	2	2	2	1	472	51.2	6.8	3.24	2
High	Q9CXS4	Centromere protein V OS=Mus musculus OX=10090 GN=Cenpv PE=1 SV=2	4.796	15	3	3	3	1	252	27.5	9.79	4.86	3
High	Q8BMB0	BRCA2-interacting transcriptional repressor EMSY OS=Mus musculus OX=10090 GN=Emsy PE=1 SV=2	4.737	2	2	2	2	1	1264	135.2	9.38	4.18	2
High	Q3V2E0	Peptidase S1 domain-containing protein OS=Mus musculus OX=10090 GN=Try5 PE=2 SV=1	4.659	8	1	3	1	1	255	27.1	6.73	7.93	1
High	Q9CZI5	40S ribosomal protein S23 OS=Mus musculus OX=10090 GN=Rps23 PE=2 SV=1	4.63	13	2	2	2	1	145	16	10.43	4.63	2
High	P47915	60S ribosomal protein L29 OS=Mus musculus OX=10090 GN=Rpl29 PE=1 SV=2	4.496	12	2	2	2	1	160	17.6	11.84	2.38	2
High	P62889	60S ribosomal protein L30 OS=Mus musculus OX=10090 GN=Rpl30 PE=1 SV=2	4.483	31	3	3	3	1	115	12.8	9.63	4.59	3
High	A0A0A6YX26	60S ribosomal protein L31 OS=Mus musculus OX=10090 GN=Rpl31 PE=1 SV=1	4.418	24	3	3	3	1	129	15	10.61	5.2	3
High	Q8CGP2-2	Isoform 2 of Histone H2B type 1-P OS=Mus musculus OX=10090 GN=Hist1h2bp	4.087	21	3	5	3	1	138	15.6	10.24	6.66	3
High	P62806	Histone H4 OS=Mus musculus OX=10090 GN=H4c1 PE=1 SV=2	3.965	21	2	2	2	1	103	11.4	11.36	5.13	2
High	Q3UL36	Arginine and glutamate-rich protein 1 OS=Mus musculus OX=10090 GN=Arglu1 PE=1 SV=2	3.942	8	3	5	3	1	271	32.9	10.36	3.9	3
High	Q8CH18	Cell division cycle and apoptosis regulator protein 1 OS=Mus musculus OX=10090 GN=Ccar1 PE=1 SV=1	3.878	2	3	3	3	1	1146	132	5.76	0	3
High	Q3UCL7	40S ribosomal protein S3 OS=Mus musculus OX=10090 GN=Rps3 PE=2 SV=1	3.832	9	2	2	2	1	243	26.7	9.52	3.8	2
High	Q3U6P5	RRM domain-containing protein OS=Mus musculus OX=10090 GN=Hnrnpc PE=2 SV=1	3.795	6	2	2	2	1	334	36.9	7.36	3.71	2
High	Q3U0T7	Uncharacterized protein OS=Mus musculus OX=10090 GN=Sp2 PE=2 SV=1	3.784	4	3	4	3	1	613	64.9	9.88	6.79	3
High	Q5M9M4	40S ribosomal protein S15a OS=Mus musculus OX=10090 GN=Rps15a PE=1 SV=1	3.606	17	2	2	2	1	130	14.8	10.13	2.71	2
High	P27659	60S ribosomal protein L3 OS=Mus musculus OX=10090 GN=Rpl3 PE=1 SV=3	3.57	4	2	2	2	1	403	46.1	10.21	1.8	2
High	P47911	60S ribosomal protein L6 OS=Mus musculus OX=10090 GN=Rpl6 PE=1 SV=3	3.522	10	3	3	3	1	296	33.5	10.7	3.68	3
High	Q8R1F0	Leydig cell tumor 10 kDa protein homolog OS=Mus musculus OX=10090 GN=D8Ertd738e PE=3 SV=1	3.475	23	3	4	3	1	94	10.2	11.63	5.5	3
High	G5E924	Heterogeneous nuclear ribonucleoprotein L (Fragment) OS=Mus musculus OX=10090 GN=Hnrnpl PE=1 SV=1	3.386	4	2	2	2	1	615	66.9	8.18	2.15	2
High	P62852	40S ribosomal protein S25 OS=Mus musculus OX=10090 GN=Rps25 PE=1 SV=1	3.361	15	2	3	2	1	125	13.7	10.11	6.02	2
High	P47963	60S ribosomal protein L13 OS=Mus musculus OX=10090 GN=Rpl13 PE=1 SV=3	3.327	9	2	2	2	1	211	24.3	11.55	1.67	2
High	P0C0S6	Histone H2A.Z OS=Mus musculus OX=10090 GN=H2az1 PE=1 SV=2	3.318	15	2	2	1	1	128	13.5	10.58	1.78	2
High	Q9ESX4	Nucleolar protein of 40 kDa OS=Mus musculus OX=10090 GN=Zcchc17 PE=1 SV=1	3.23	12	2	2	2	1	241	27.5	9.63	2.24	2
High	Q5BLK2	40S ribosomal protein S20 OS=Mus musculus OX=10090 GN=Rps20 PE=1 SV=1	3.077	9	1	1	1	1	119	13.4	9.94	2.66	1
High	P09405	Nucleolin OS=Mus musculus OX=10090 GN=Ncl PE=1 SV=2	3.074	3	2	3	2	1	707	76.7	4.75	2.15	2
High	B1AUX2	Host cell factor 1 OS=Mus musculus OX=10090 GN=Hcfc1 PE=1 SV=1	3.05	1	1	1	1	1	2090	214.9	6.89	1.87	1
High	Q3TEA8	Heterochromatin protein 1-binding protein 3 OS=Mus musculus OX=10090 GN=Hp1bp3 PE=1 SV=1	3.019	4	2	2	2	1	554	60.8	9.7	3.56	2
High	P08113	Endoplasmin OS=Mus musculus OX=10090 GN=Hsp90b1 PE=1 SV=2	2.924	2	2	2	2	1	802	92.4	4.82	0	2
High	A0A6Q6PUT5	Pre-mRNA-processing factor 40 homolog A (Fragment) OS=Mus musculus OX=10090 GN=Prpf40a PE=1 SV=1	2.744	2	2	2	2	1	966	109.8	8.12	0	2
High	Q5CZY9	Rps16 protein OS=Mus musculus OX=10090 GN=Rps16 PE=2 SV=1	2.743	6	1	1	1	1	172	19.3	10.2	1.64	1
High	P35980	60S ribosomal protein L18 OS=Mus musculus OX=10090 GN=Rpl18 PE=1 SV=3	2.719	10	2	2	2	1	188	21.6	11.78	2.18	2
High	Q9D1R9	60S ribosomal protein L34 OS=Mus musculus OX=10090 GN=Rpl34 PE=1 SV=2	2.67	14	2	2	2	1	117	13.3	11.47	0	2
High	A0A0A0MQF6	Glyceraldehyde-3-phosphate dehydrogenase OS=Mus musculus OX=10090 GN=Gapdh PE=1 SV=1	2.65	6	2	2	2	1	359	38.6	8.97	0	2
High	Q8K363	ATP-dependent RNA helicase DDX18 OS=Mus musculus OX=10090 GN=Ddx18 PE=1 SV=1	2.646	3	2	2	2	1	660	74.1	9.52	1.79	2
High	A0A140T8N8	Immunoglobulin kappa variable 9-123 (Fragment) OS=Mus musculus OX=10090 GN=Igkv9-123 PE=4 SV=2	2.595	14	1	3	1	1	117	12.8	6.54	2.68	1
High	Q8R0K4	Coiled-coil domain-containing protein 137 OS=Mus musculus OX=10090 GN=Ccdc137 PE=2 SV=1	2.593	7	2	3	2	1	290	32.9	10.68	2.35	2
High	A0A4E9FT70	IgG3 (Fragment) OS=Mus musculus OX=10090 GN=IGHG3 PE=4 SV=1	2.55	3	1	1	1	1	376	41.2	7.9	0	1
High	P62320	Small nuclear ribonucleoprotein Sm D3 OS=Mus musculus OX=10090 GN=Snrpd3 PE=1 SV=1	2.54	8	1	1	1	1	126	13.9	10.32	2.68	1
High	Q9WUK4	Replication factor C subunit 2 OS=Mus musculus OX=10090 GN=Rfc2 PE=1 SV=1	2.508	7	2	2	2	1	349	38.7	6.44	4.18	2
High	H7BX95	Serine/arginine-rich splicing factor 1 OS=Mus musculus OX=10090 GN=Srsf1 PE=1 SV=1	2.489	9	2	2	2	1	253	28.3	10.08	3.83	2
High	Q792Z1	Trypsin 10 OS=Mus musculus OX=10090 GN=Try10 PE=1 SV=1	2.462	11	1	1	1	1	246	26.2	5.83	5.86	1
High	A0A1Y7VKY1	40S ribosomal protein S18 OS=Mus musculus OX=10090 GN=Rps18-ps5 PE=3 SV=1	2.379	13	2	2	2	1	152	17.7	10.86	2.01	2
High	Q8BL97	Serine/arginine-rich splicing factor 7 OS=Mus musculus OX=10090 GN=Srsf7 PE=1 SV=1	2.323	4	1	1	1	1	267	30.8	11.9	1.7	1
High	Q3THH1	Protein disulfide-isomerase A6 OS=Mus musculus OX=10090 GN=Pdia6 PE=2 SV=1	2.277	3	1	1	1	1	445	48.6	5.19	3.05	1
High	P62858	40S ribosomal protein S28 OS=Mus musculus OX=10090 GN=Rps28 PE=1 SV=1	2.259	17	1	1	1	1	69	7.8	10.7	2.64	1
High	Q9WU62	Inner centromere protein OS=Mus musculus OX=10090 GN=Incenp PE=1 SV=2	2.25	1	1	1	1	1	880	101.1	9.55	0	1
High	P99027	60S acidic ribosomal protein P2 OS=Mus musculus OX=10090 GN=Rplp2 PE=1 SV=3	2.242	14	1	1	1	1	115	11.6	4.54	3.2	1
High	Q9D8M4	60S ribosomal protein L7-like 1 OS=Mus musculus OX=10090 GN=Rpl7l1 PE=1 SV=1	2.236	7	1	1	1	1	246	28.5	10.64	0	1
High	O88532	Zinc finger RNA-binding protein OS=Mus musculus OX=10090 GN=Zfr PE=1 SV=2	2.203	1	1	1	1	1	1074	116.8	9.04	2	1
High	Q6ZQ61	MKIAA0723 protein (Fragment) OS=Mus musculus OX=10090 GN=Matr3 PE=2 SV=1	2.164	3	2	2	2	1	852	95.2	6.27	0	2
High	P33174	Chromosome-associated kinesin KIF4 OS=Mus musculus OX=10090 GN=Kif4 PE=1 SV=3	2.103	2	2	2	2	1	1231	139.4	6.68	1.85	2
High	Q9JM93	ADP-ribosylation factor-like protein 6-interacting protein 4 OS=Mus musculus OX=10090 GN=Arl6ip4 PE=1 SV=1	2.088	5	1	1	1	1	229	25.5	11.19	2.15	1
High	P62918	60S ribosomal protein L8 OS=Mus musculus OX=10090 GN=Rpl8 PE=1 SV=2	2.056	6	1	1	1	1	257	28	11.03	0	1
High	Q8BP71	RNA binding protein fox-1 homolog 2 OS=Mus musculus OX=10090 GN=Rbfox2 PE=1 SV=2	2.043	2	1	1	1	1	449	47.3	6.55	0	1
High	Q9WV85	Nucleoside diphosphate kinase 3 OS=Mus musculus OX=10090 GN=Nme3 PE=1 SV=3	2.007	7	1	1	1	1	169	19.1	6.68	2.05	1
High	G5E866	Splicing factor 3B subunit 1 OS=Mus musculus OX=10090 GN=Sf3b1 PE=1 SV=1	1.961	1	1	1	1	1	1304	145.7	7.09	2.01	1
High	Q5I0T8	Ribosomal protein L19 OS=Mus musculus OX=10090 GN=Rpl19 PE=1 SV=1	1.951	5	1	1	1	1	196	23.5	11.47	1.96	1
High	G5E870	E3 ubiquitin-protein ligase TRIP12 OS=Mus musculus OX=10090 GN=Trip12 PE=1 SV=1	1.938	0	1	1	1	1	2025	224	8.35	0	1
High	Q9ERD7	Tubulin beta-3 chain OS=Mus musculus OX=10090 GN=Tubb3 PE=1 SV=1	1.897	4	1	1	1	1	450	50.4	4.93	2.34	1
High	Q9CVI2	Protein FAM133B OS=Mus musculus OX=10090 GN=Fam133b PE=1 SV=3	1.871	3	1	1	1	1	245	27.9	10.07	0	1
High	Q925J9	Mediator of RNA polymerase II transcription subunit 1 OS=Mus musculus OX=10090 GN=Med1 PE=1 SV=2	1.781	1	1	1	1	1	1575	167	8.73	1.87	1
High	Q9CWK0	60S ribosomal protein L14 OS=Mus musculus OX=10090 GN=Rpl14 PE=2 SV=1	1.775	6	1	1	1	1	227	26.3	11.9	2.2	1
High	Q60749	KH domain-containing, RNA-binding, signal transduction-associated protein 1 OS=Mus musculus OX=10090 GN=Khdrbs1 PE=1 SV=2	1.75	3	1	1	1	1	443	48.3	8.72	0	1
High	Q6PIJ4	Nuclear factor related to kappa-B-binding protein OS=Mus musculus OX=10090 GN=Nfrkb PE=1 SV=1	1.744	1	1	1	1	1	1296	138.7	9.22	0	1
High	Q3UTJ2-2	Isoform 2 of Sorbin and SH3 domain-containing protein 2 OS=Mus musculus OX=10090 GN=Sorbs2	1.681	1	1	1	1	1	1295	144.9	8.27	1.69	1
High	D3YWN7	Ensconsin OS=Mus musculus OX=10090 GN=Map7 PE=1 SV=2	1.653	1	1	1	1	1	738	82.8	9.38	0	1
High	B2RY56	RNA-binding protein 25 OS=Mus musculus OX=10090 GN=Rbm25 PE=1 SV=2	1.633	2	1	1	1	1	838	99.5	6.32	0	1
High	E9PY37	T-complex-associated testis-expressed 2 OS=Mus musculus OX=10090 GN=Tcte2 PE=4 SV=1	1.599	17	1	1	1	1	120	12.9	9.99	0	1
High	P53026	60S ribosomal protein L10a OS=Mus musculus OX=10090 GN=Rpl10a PE=1 SV=3	1.558	6	1	1	1	1	217	24.9	9.98	0	1
High	A2ABV5	Mediator of RNA polymerase II transcription subunit 14 OS=Mus musculus OX=10090 GN=Med14 PE=1 SV=1	1.553	1	1	1	1	1	1459	160.9	8.53	0	1
High	Q00547	Hyaluronan mediated motility receptor OS=Mus musculus OX=10090 GN=Hmmr PE=1 SV=4	1.545	6	1	1	1	1	794	91.7	5.52	2.74	1
High	Q3TWW8	Serine/arginine-rich splicing factor 6 OS=Mus musculus OX=10090 GN=Srsf6 PE=1 SV=1	1.529	3	1	1	1	1	339	39	11.46	0	1
High	Q9CXW4	60S ribosomal protein L11 OS=Mus musculus OX=10090 GN=Rpl11 PE=1 SV=4	1.526	5	1	1	1	1	178	20.2	9.6	0	1
High	Q3TL71	Heterogeneous nuclear ribonucleoprotein K OS=Mus musculus OX=10090 GN=Hnrnpk PE=2 SV=1	1.516	2	1	1	1	1	464	51	5.45	1.72	1
High	Q3U5I2	Polypyrimidine tract-binding protein 1 OS=Mus musculus OX=10090 GN=Ptbp1 PE=2 SV=1	1.516	2	1	1	1	1	555	59.2	9.17	0	1
High	Q91V99	40S ribosomal protein S30 (Fragment) OS=Mus musculus OX=10090 GN=fau PE=3 SV=1	1.501	7	1	1	1	1	137	14.8	10.05	1.74	1
High	Q6ZWN5	40S ribosomal protein S9 OS=Mus musculus OX=10090 GN=Rps9 PE=1 SV=3	1.446	5	1	1	1	1	194	22.6	10.65	0	1
High	Q5M9P3	40S ribosomal protein S19 (Fragment) OS=Mus musculus OX=10090 GN=Rps19 PE=2 SV=1	1.422	7	1	1	1	1	151	16.7	10.52	2.15	1
High	P62315	Small nuclear ribonucleoprotein Sm D1 OS=Mus musculus OX=10090 GN=Snrpd1 PE=1 SV=1	1.42	11	1	1	1	1	119	13.3	11.56	0	1
High	Q7TNV0	Protein DEK OS=Mus musculus OX=10090 GN=Dek PE=1 SV=1	1.406	2	1	1	1	1	380	43.1	6.86	0	1
High	Q3U8M3	Uncharacterized protein OS=Mus musculus OX=10090 GN=Rpl37a PE=2 SV=1	1.392	12	1	1	1	1	97	10.7	10.67	0	1
High	Q8R2S9	Actin-related protein 8 OS=Mus musculus OX=10090 GN=Actr8 PE=2 SV=1	1.382	1	1	1	1	1	624	70.5	7.77	0	1
High	P62830	60S ribosomal protein L23 OS=Mus musculus OX=10090 GN=Rpl23 PE=1 SV=1	1.38	6	1	1	1	1	140	14.9	10.51	0	1
High	Q80WM4	Hyaluronan and proteoglycan link protein 4 OS=Mus musculus OX=10090 GN=Hapln4 PE=2 SV=2	1.38	2	1	1	1	1	400	42.8	8.85	1.64	1
High	Q8BTU1	Cilia- and flagella-associated protein 20 OS=Mus musculus OX=10090 GN=Cfap20 PE=1 SV=1	1.365	4	1	1	1	1	193	22.7	9.76	0	1
High	A0A5F8MPZ2	Kinesin light chain OS=Mus musculus OX=10090 GN=Klc1 PE=1 SV=1	1.361	2	1	1	1	1	637	71.8	6.57	2.13	1
High	Q9WUP7	Ubiquitin carboxyl-terminal hydrolase isozyme L5 OS=Mus musculus OX=10090 GN=Uchl5 PE=1 SV=2	1.356	2	1	1	1	1	329	37.6	5.33	0	1
High	P01027	Complement C3 OS=Mus musculus OX=10090 GN=C3 PE=1 SV=3	1.341	1	1	1	1	1	1663	186.4	6.73	2.21	1
High	K7TGT6	IgA heavy chain variable region (Fragment) OS=Mus musculus OX=10090 PE=2 SV=1	1.317	6	1	1	1	1	109	11.7	8.46	0	1
Medium	P11031	Activated RNA polymerase II transcriptional coactivator p15 OS=Mus musculus OX=10090 GN=Sub1 PE=1 SV=3	1.31	9	1	1	1	1	127	14.4	9.6	2.39	1
Medium	A0A1S6GWJ8	Uncharacterized protein OS=Mus musculus OX=10090 GN=Hnrnpm PE=2 SV=1	1.278	1	1	1	1	1	809	86.4	9.11	0	1
Medium	A0A2I3BPG9	Ribosomal protein L36A, pseudogene 1 OS=Mus musculus OX=10090 GN=Rpl36a-ps1 PE=3 SV=1	1.267	8	1	1	1	1	106	12.4	10.51	0	1
Medium	Q6P9P6	Kinesin-like protein KIF11 OS=Mus musculus OX=10090 GN=Kif11 PE=1 SV=1	1.254	1	1	1	1	1	1052	118	6	0	1
Medium	Q5FWB6	60S acidic ribosomal protein P0 OS=Mus musculus OX=10090 GN=Rplp0 PE=2 SV=1	1.25	2	1	1	1	1	317	34.2	6.25	1.71	1
Medium	Q80V08	60S ribosomal protein L17 (Fragment) OS=Mus musculus OX=10090 GN=Rpl17 PE=2 SV=1	1.226	5	1	1	1	1	194	22.4	10.33	0	1
Medium	Q8BQ46	TAF15 RNA polymerase II, TATA box binding protein (TBP)-associated factor OS=Mus musculus OX=10090 GN=Taf15 PE=1 SV=1	1.186	2	1	1	1	1	557	58.6	8.4	1.69	1
Medium	A0A075B5L7	Immunoglobulin kappa variable 4-80 (Fragment) OS=Mus musculus OX=10090 GN=Igkv4-80 PE=4 SV=2	1.184	14	1	1	1	1	116	12.6	5.15	2.81	1
Medium	A0A3B0INZ4	Adiponectin b OS=Mus musculus OX=10090 GN=Adib PE=4 SV=1	1.182	4	1	1	1	1	276	29.3	8.69	1.94	1
Medium	A0A0J9YUM1	PRAME-like 41 OS=Mus musculus OX=10090 GN=Pramel41 PE=3 SV=1	1.165	2	1	1	1	1	481	56.2	7.99	0	1
Medium	Q8VH51	RNA-binding protein 39 OS=Mus musculus OX=10090 GN=Rbm39 PE=1 SV=2	1.163	2	1	1	1	1	530	59.4	10.1	1.78	1
Medium	B1ASA5	Zinc finger protein 362 OS=Mus musculus OX=10090 GN=Zfp362 PE=1 SV=1	1.155	3	1	1	1	1	418	45.6	9.64	0	1
Medium	Q99PT3	INO80 complex subunit B OS=Mus musculus OX=10090 GN=Ino80b PE=1 SV=2	1.152	3	1	1	1	1	375	40.5	9.41	1.82	1
Medium	Q4QY64	ATPase family AAA domain-containing protein 5 OS=Mus musculus OX=10090 GN=Atad5 PE=1 SV=1	1.139	0	1	1	1	1	1826	203.8	8.9	0	1
Medium	A0A087WR34	Predicted gene, 20379 (Fragment) OS=Mus musculus OX=10090 GN=Gm20379 PE=3 SV=1	1.132	10	1	1	1	1	119	12.8	10.37	1.99	1
Medium	Q3TYU7	FHA domain-containing protein OS=Mus musculus OX=10090 GN=Mcrs1 PE=2 SV=1	1.131	2	1	1	1	1	462	51.6	9.32	0	1
Medium	D3YWJ3	40S ribosomal protein S2 OS=Mus musculus OX=10090 GN=Rps2 PE=1 SV=1	1.124	2	1	1	1	1	302	32.1	9.92	1.72	1
Medium	Q9D8E6	60S ribosomal protein L4 OS=Mus musculus OX=10090 GN=Rpl4 PE=1 SV=3	1.122	2	1	1	1	1	419	47.1	11	1.99	1
Medium	O08807	Peroxiredoxin-4 OS=Mus musculus OX=10090 GN=Prdx4 PE=1 SV=1	1.119	3	1	1	1	1	274	31	7.15	0	1
Medium	Q8CGF7	Transcription elongation regulator 1 OS=Mus musculus OX=10090 GN=Tcerg1 PE=1 SV=2	1.095	2	1	1	1	1	1100	123.7	8.65	0	1
Medium	B9EK83	Non-specific serine/threonine protein kinase OS=Mus musculus OX=10090 GN=Trpm7 PE=2 SV=1	1.094	1	1	1	1	1	1863	212.3	7.84	0	1
Medium	P62317	Small nuclear ribonucleoprotein Sm D2 OS=Mus musculus OX=10090 GN=Snrpd2 PE=1 SV=1	1.081	8	1	1	1	1	118	13.5	9.91	0	1
Medium	P29788	Vitronectin OS=Mus musculus OX=10090 GN=Vtn PE=1 SV=2	1.081	4	1	1	1	1	478	54.8	5.88	0	1
Medium	E9QNV2	Mediator complex subunit 23 OS=Mus musculus OX=10090 GN=Med23 PE=1 SV=1	1.081	1	1	1	1	1	1376	157	7.31	2.1	1
Medium	A0A0E4B366	MAb 44B1 heavy chain OS=Mus musculus OX=10090 GN=HC PE=2 SV=1	1.076	1	1	1	1	1	472	51.8	8.35	0	1
Medium	Q6ZWV7	60S ribosomal protein L35 OS=Mus musculus OX=10090 GN=Rpl35 PE=1 SV=1	1.07	8	1	1	1	1	123	14.5	11.05	2.02	1
Medium	A0A2I3BPN8	Ral GTPase-activating protein subunit alpha-2 OS=Mus musculus OX=10090 GN=Ralgapa2 PE=1 SV=1	1.066	0	1	1	1	1	1957	218.9	6.39	0	1
Medium	Q3TFV6	Cyclin N-terminal domain-containing protein OS=Mus musculus OX=10090 GN=Ccnb1 PE=2 SV=1	1.043	3	1	1	1	1	430	48.1	7.43	0	1
Medium	Q8CGY6	Protein unc-45 homolog B OS=Mus musculus OX=10090 GN=Unc45b PE=1 SV=1	1.042	2	1	1	1	1	931	103.6	7.97	0	1
Medium	Q569Z6	Thyroid hormone receptor-associated protein 3 OS=Mus musculus OX=10090 GN=Thrap3 PE=1 SV=1	1.035	1	1	1	1	1	951	108.1	10.17	2.16	1
Medium	P62751	60S ribosomal protein L23a OS=Mus musculus OX=10090 GN=Rpl23a PE=1 SV=1	1.032	5	1	1	1	1	156	17.7	10.45	0	1
Medium	A0A1W2P768	Histone H3.2 OS=Mus musculus OX=10090 GN=H3c14 PE=1 SV=1	1.021	4	1	1	1	1	181	20.2	11.39	0	1
Medium	Q3TSX4	Uncharacterized protein (Fragment) OS=Mus musculus OX=10090 GN=C1galt1c1 PE=2 SV=1	1.02	9	1	1	1	1	177	19.4	9.82	0	1
Medium	Q3U7D2	Ribosomal protein L15 OS=Mus musculus OX=10090 GN=Rpl15 PE=2 SV=1	1.011	4	1	1	1	1	204	24.1	11.62	0	1
Medium	Q505A8	Ribosomal protein L39 OS=Mus musculus OX=10090 GN=Rpl39 PE=1 SV=1	1.008	20	1	1	1	1	51	6.4	12.56	2.14	1
Medium	Q99PV0	Pre-mRNA-processing-splicing factor 8 OS=Mus musculus OX=10090 GN=Prpf8 PE=1 SV=2	1.002	0	1	1	1	1	2335	273.4	8.84	0	1
Medium	A0A668KLC6	Microtubule-associated protein OS=Mus musculus OX=10090 GN=Map2 PE=1 SV=1	1.001	0	1	1	1	1	1989	216	4.84	1.82	1
Medium	Q549X6	Synaptotagmin-like protein 4-a OS=Mus musculus OX=10090 GN=Sytl4 PE=2 SV=1	1	1	1	1	1	1	673	76	8.84	0	1
Medium	Q3TRR1	Uncharacterized protein OS=Mus musculus OX=10090 GN=Pax6 PE=2 SV=1	0.99	26	1	1	1	1	66	7.7	8.51	0	1
Medium	O70569	Ribosomal protein S14 OS=Mus musculus OX=10090 GN=rps14 PE=3 SV=1	0.97	7	1	1	1	1	151	16.3	10.13	1.62	1
Medium	B2RSV4	Splicing factor 3b, subunit 3 OS=Mus musculus OX=10090 GN=Sf3b3 PE=2 SV=1	0.969	1	1	1	1	1	1217	135.5	5.26	0	1
Medium	P84104	Serine/arginine-rich splicing factor 3 OS=Mus musculus OX=10090 GN=Srsf3 PE=1 SV=1	0.966	5	1	1	1	1	164	19.3	11.65	0	1
Medium	P56931	Transcription factor E2F2 OS=Mus musculus OX=10090 GN=E2f2 PE=1 SV=2	0.956	2	1	1	1	1	443	48.5	4.88	0	1
Medium	Q3U1J1	TCF3 fusion partner homolog OS=Mus musculus OX=10090 GN=Tfpt PE=1 SV=1	0.948	3	1	1	1	1	259	28.9	4.89	0	1
Medium	P14115	60S ribosomal protein L27a OS=Mus musculus OX=10090 GN=Rpl27a PE=1 SV=5	0.948	7	1	1	1	1	148	16.6	11.12	1.95	1
Medium	Q8C9B9	Death-inducer obliterator 1 OS=Mus musculus OX=10090 GN=Dido1 PE=1 SV=4	0.944	0	1	1	1	1	2256	247	7.91	0	1
Medium	P63163	Small nuclear ribonucleoprotein-associated protein N OS=Mus musculus OX=10090 GN=Snrpn PE=1 SV=1	0.938	3	1	1	1	1	240	24.6	11.19	0	1
Medium	K7N6K9	Sulfotransferase OS=Mus musculus OX=10090 GN=Sult2a5 PE=1 SV=1	0.932	4	1	1	1	1	285	33.3	7.43	0	1
Medium	Q99LX5	Multiple myeloma tumor-associated protein 2 homolog OS=Mus musculus OX=10090 GN=Mmtag2 PE=2 SV=1	0.92	3	1	1	1	1	260	29.3	9.86	0	1

## Sheet: IgG IP 1
Protein FDR Confidence: Combined	Accession	Description	Sum PEP Score	Coverage [%]	# Peptides	# PSMs	# Unique Peptides	# Protein Groups	# AAs	MW [kDa]	calc. pI	Score Sequest HT: Sequest HT	# Peptides (by Search Engine): Sequest HT
High	E9Q7G0	Nuclear mitotic apparatus protein 1 OS=Mus musculus OX=10090 GN=Numa1 PE=1 SV=1	436.461	60	100	204	67	1	2094	235.5	5.87	565.44	100
High	F6ZQA3	Nuclear mitotic apparatus protein 1 (Fragment) OS=Mus musculus OX=10090 GN=Numa1 PE=1 SV=1	146.805	60	34	74	1	1	741	82.8	9.44	194.89	34
High	Q80WE4	Kinesin-like protein KIF20B OS=Mus musculus OX=10090 GN=Kif20b PE=1 SV=3	136.761	31	46	57	46	1	1774	203.4	5.78	145.39	46
High	Q571G8	MKIAA1649 protein (Fragment) OS=Mus musculus OX=10090 GN=Poldip3 PE=2 SV=1	133.354	63	26	73	26	1	453	49.7	10.42	179.31	26
High	A0A068BFR6	Kinesin-like protein OS=Mus musculus OX=10090 GN=Kifc1 PE=2 SV=1	120.068	55	34	64	6	1	674	74.1	8.72	164.05	34
High	E9PUA5	Kinesin-like protein OS=Mus musculus OX=10090 GN=Kifc5b PE=1 SV=1	109.997	58	34	57	6	1	672	73.6	8.81	138.86	34
High	E9PVX6	Proliferation marker protein Ki-67 OS=Mus musculus OX=10090 GN=Mki67 PE=1 SV=1	99.897	19	42	51	42	1	3177	350.7	9.72	107.54	42
High	A0A0R4J1A6	GAS2-like protein 3 OS=Mus musculus OX=10090 GN=Gas2l3 PE=1 SV=1	56.269	34	17	21	17	1	683	74.2	9.6	56.37	17
High	P43275	Histone H1.1 OS=Mus musculus OX=10090 GN=H1-1 PE=1 SV=2	55.87	31	8	29	6	1	213	21.8	10.93	82.53	8
High	Q6ZPW1	MKIAA1196 protein (Fragment) OS=Mus musculus OX=10090 GN=Zfp512b PE=2 SV=1	47.566	25	13	14	13	1	883	96.5	9.76	37.22	13
High	Q3TW77	Uncharacterized protein OS=Mus musculus OX=10090 GN=Grn PE=2 SV=1	40.03	26	9	22	9	1	602	65	6.99	62.27	9
High	Q3V1H1	Cytoskeleton-associated protein 2 OS=Mus musculus OX=10090 GN=Ckap2 PE=1 SV=1	38.452	34	15	16	15	1	664	74	9.23	34.39	15
High	A2APB8	Targeting protein for Xklp2 OS=Mus musculus OX=10090 GN=Tpx2 PE=1 SV=1	38.429	26	16	17	16	1	745	85.8	9.38	32.75	16
High	Q9ERH4	Nucleolar and spindle-associated protein 1 OS=Mus musculus OX=10090 GN=Nusap1 PE=1 SV=1	34.759	31	12	19	12	1	427	48.5	9.89	45.19	12
High	Q8C2Q3	RNA-binding protein 14 OS=Mus musculus OX=10090 GN=Rbm14 PE=1 SV=1	28.192	21	11	14	11	1	669	69.4	9.67	32.48	11
High	Q571J8	Non-specific serine/threonine protein kinase (Fragment) OS=Mus musculus OX=10090 GN=Mark2 PE=2 SV=1	23.58	17	9	10	9	1	780	86.7	9.61	22.32	9
High	Q32P04	Keratin 5 OS=Mus musculus OX=10090 GN=Krt5 PE=1 SV=2	19.725	17	12	14	4	1	580	61.7	7.75	14.6	12
High	Q7TPV4	Myb-binding protein 1A OS=Mus musculus OX=10090 GN=Mybbp1a PE=1 SV=2	19.045	8	8	8	8	1	1344	151.9	8.95	18.71	8
High	Q8VIJ6	Splicing factor, proline- and glutamine-rich OS=Mus musculus OX=10090 GN=Sfpq PE=1 SV=1	18.996	13	7	11	7	1	699	75.4	9.44	16.69	7
High	A0A097PUG4	Anti-lox-1 15C4 light chain OS=Mus musculus OX=10090 PE=2 SV=1	15.481	36	5	7	5	1	238	25.9	4.94	14.63	5
High	P15864	Histone H1.2 OS=Mus musculus OX=10090 GN=H1-2 PE=1 SV=2	15.234	25	6	20	2	1	212	21.3	11	45.28	6
High	Q1WWK3	Hist1h1b protein (Fragment) OS=Mus musculus OX=10090 GN=H1f5 PE=2 SV=1	14	26	5	15	4	1	222	22.4	10.92	36.48	5
High	O08583	THO complex subunit 4 OS=Mus musculus OX=10090 GN=Alyref PE=1 SV=3	13.991	11	2	6	2	1	255	26.9	11.15	12.92	2
High	Q68FG3	Protein SPT2 homolog OS=Mus musculus OX=10090 GN=Spty2d1 PE=2 SV=1	13.829	14	10	13	10	1	682	74.8	9.76	15.23	10
High	Q3V0Z8	DEAD box protein 5 (Fragment) OS=Mus musculus OX=10090 GN=Ddx5 PE=2 SV=1	13.476	11	7	8	7	1	690	76.7	8.6	11.18	7
High	P43274	Histone H1.4 OS=Mus musculus OX=10090 GN=H1-4 PE=1 SV=2	13.092	19	5	17	1	1	219	22	11.11	38.08	5
High	Q3TF40	Uncharacterized protein (Fragment) OS=Mus musculus OX=10090 GN=Nono PE=2 SV=1	12.732	19	7	9	7	1	528	60.4	9.61	18.2	7
High	Q52L97	Importin subunit alpha OS=Mus musculus OX=10090 GN=Kpna2 PE=1 SV=1	12.696	12	4	4	4	1	529	57.9	5.68	10.59	4
High	P50446	Keratin, type II cytoskeletal 6A OS=Mus musculus OX=10090 GN=Krt6a PE=1 SV=3	12.595	10	7	8	1	1	553	59.3	7.94	9.99	7
High	G3UWQ7	Protein regulator of cytokinesis 1 OS=Mus musculus OX=10090 GN=Prc1 PE=1 SV=1	11.916	12	5	6	5	1	620	72	7.75	13.41	5
High	Q80ZM5	H1 histone family, member X OS=Mus musculus OX=10090 GN=H1f10 PE=1 SV=1	11.554	17	3	6	3	1	188	20.1	11.22	16.03	3
High	Q3TVV6	Uncharacterized protein OS=Mus musculus OX=10090 GN=Hnrnpu PE=2 SV=1	11.249	7	6	6	6	1	800	87.9	6.24	7.97	6
High	Q7TS74	Cytoskeleton-associated protein 2-like OS=Mus musculus OX=10090 GN=Ckap2l PE=1 SV=1	10.903	9	5	5	5	1	745	82.9	9.69	10.14	5
High	Q3U0T7	Uncharacterized protein OS=Mus musculus OX=10090 GN=Sp2 PE=2 SV=1	10.632	9	5	5	5	1	613	64.9	9.88	10.23	5
High	Q8C852	Uncharacterized protein OS=Mus musculus OX=10090 GN=Dcx PE=2 SV=1	10.271	13	4	4	4	1	379	42.5	9.72	9.35	4
High	Q9Z1R9	Protease, serine 1 (trypsin 1) OS=Mus musculus OX=10090 GN=Prss1 PE=1 SV=1	9.548	16	2	8	2	1	246	26.1	4.94	19.08	2
High	P11087	Collagen alpha-1(I) chain OS=Mus musculus OX=10090 GN=Col1a1 PE=1 SV=4	9.34	4	5	7	5	1	1453	137.9	5.85	14.98	5
High	Q61781	Keratin, type I cytoskeletal 14 OS=Mus musculus OX=10090 GN=Krt14 PE=1 SV=2	9.114	9	5	5	2	1	484	52.8	5.17	7.14	5
High	P62702	40S ribosomal protein S4, X isoform OS=Mus musculus OX=10090 GN=Rps4x PE=1 SV=2	8.741	13	4	4	4	1	263	29.6	10.15	9.2	4
High	P20029	Endoplasmic reticulum chaperone BiP OS=Mus musculus OX=10090 GN=Hspa5 PE=1 SV=3	8.7	7	4	5	4	1	655	72.4	5.16	8.77	4
High	Q9DB79	40S ribosomal protein S11 OS=Mus musculus OX=10090 GN=Rps11 PE=2 SV=1	8.682	22	3	4	3	1	166	19.4	10.14	5.81	3
High	Q3UV17	Keratin, type II cytoskeletal 2 oral OS=Mus musculus OX=10090 GN=Krt76 PE=1 SV=1	8.671	7	6	7	1	1	594	62.8	8.43	9.43	6
High	P10126	Elongation factor 1-alpha 1 OS=Mus musculus OX=10090 GN=Eef1a1 PE=1 SV=3	8.663	11	4	4	4	1	462	50.1	9.01	6.46	4
High	Q3UK83	Helix-destabilizing protein OS=Mus musculus OX=10090 GN=Hnrnpa1 PE=2 SV=1	7.426	12	4	5	4	1	373	38.8	9.13	9.4	4
High	P97351	40S ribosomal protein S3a OS=Mus musculus OX=10090 GN=Rps3a PE=1 SV=3	7.415	14	3	3	3	1	264	29.9	9.73	4.85	3
High	Q3TEA8	Heterochromatin protein 1-binding protein 3 OS=Mus musculus OX=10090 GN=Hp1bp3 PE=1 SV=1	6.686	7	4	4	4	1	554	60.8	9.7	4.63	4
High	Q3UW40	TRASH domain-containing protein OS=Mus musculus OX=10090 GN=Rpl24 PE=2 SV=1	6.565	20	3	3	3	1	160	18.2	11.05	5.87	3
High	Q9CY57	Chromatin target of PRMT1 protein OS=Mus musculus OX=10090 GN=Chtop PE=1 SV=2	6.285	17	3	3	3	1	249	26.6	12.23	4.38	3
High	Q8CGP2-2	Isoform 2 of Histone H2B type 1-P OS=Mus musculus OX=10090 GN=Hist1h2bp	6.163	24	3	3	3	1	138	15.6	10.24	6.53	3
High	Q792Z1	Trypsin 10 OS=Mus musculus OX=10090 GN=Try10 PE=1 SV=1	5.92	19	2	2	2	1	246	26.2	5.83	6.07	2
High	P51881	ADP/ATP translocase 2 OS=Mus musculus OX=10090 GN=Slc25a5 PE=1 SV=3	5.833	13	4	4	2	1	298	32.9	9.73	7.97	4
High	Q3UZG3	Uncharacterized protein OS=Mus musculus OX=10090 GN=Hnrnpa3 PE=2 SV=1	5.479	8	2	2	2	1	379	39.7	9.1	3.1	2
High	P10922	Histone H1.0 OS=Mus musculus OX=10090 GN=H1-0 PE=2 SV=4	5.305	11	2	3	2	1	194	20.8	10.9	6.65	2
High	Q8R080	G2 and S phase-expressed protein 1 OS=Mus musculus OX=10090 GN=Gtse1 PE=1 SV=2	5.23	6	3	3	3	1	741	78.7	9.39	4.08	3
High	A0A0G2JFH2	Microtubule-associated protein (Fragment) OS=Mus musculus OX=10090 GN=Map4 PE=1 SV=1	5.172	2	2	2	2	1	1441	152.7	9.28	4.35	2
High	P35550	rRNA 2'-O-methyltransferase fibrillarin OS=Mus musculus OX=10090 GN=Fbl PE=1 SV=2	5.072	9	2	2	2	1	327	34.3	10.24	2.65	2
High	Q9ERR1	Nuclear distribution protein nudE-like 1 OS=Mus musculus OX=10090 GN=Ndel1 PE=1 SV=2	5.051	12	4	4	4	1	345	38.3	5.24	5.82	4
High	Q69Z99	Zinc finger protein 512 OS=Mus musculus OX=10090 GN=Znf512 PE=2 SV=2	4.787	6	2	2	2	1	562	63.9	9.51	5.94	2
High	P19001	Keratin, type I cytoskeletal 19 OS=Mus musculus OX=10090 GN=Krt19 PE=1 SV=1	4.764	9	4	4	1	1	403	44.5	5.39	3.92	4
High	Q01149	Collagen alpha-2(I) chain OS=Mus musculus OX=10090 GN=Col1a2 PE=1 SV=2	4.654	3	4	4	4	1	1372	129.5	9.19	8.71	4
High	P63325	40S ribosomal protein S10 OS=Mus musculus OX=10090 GN=Rps10 PE=1 SV=1	4.479	15	2	2	2	1	165	18.9	10.15	2.22	2
High	Q8R0K4	Coiled-coil domain-containing protein 137 OS=Mus musculus OX=10090 GN=Ccdc137 PE=2 SV=1	4.317	15	4	4	4	1	290	32.9	10.68	6.42	4
High	Q3UL36	Arginine and glutamate-rich protein 1 OS=Mus musculus OX=10090 GN=Arglu1 PE=1 SV=2	4.277	8	3	3	3	1	271	32.9	10.36	2.39	3
High	P48962	ADP/ATP translocase 1 OS=Mus musculus OX=10090 GN=Slc25a4 PE=1 SV=4	3.88	10	3	3	1	1	298	32.9	9.72	5.86	3
High	A0A4E9FT70	IgG3 (Fragment) OS=Mus musculus OX=10090 GN=IGHG3 PE=4 SV=1	3.71	5	3	3	3	1	376	41.2	7.9	3.61	3
High	P62852	40S ribosomal protein S25 OS=Mus musculus OX=10090 GN=Rps25 PE=1 SV=1	3.689	14	2	2	2	1	125	13.7	10.11	3.89	2
High	A0A140T8T4	60S ribosomal protein L9 OS=Mus musculus OX=10090 GN=Rpl9-ps6 PE=3 SV=1	3.572	7	1	1	1	1	192	21.8	9.88	3.06	1
High	Q9WV02	RNA-binding motif protein, X chromosome OS=Mus musculus OX=10090 GN=Rbmx PE=1 SV=1	3.557	7	2	2	2	1	391	42.3	10.05	1.93	2
High	O88569	Heterogeneous nuclear ribonucleoproteins A2/B1 OS=Mus musculus OX=10090 GN=Hnrnpa2b1 PE=1 SV=2	3.486	8	3	3	3	1	353	37.4	8.95	2.38	3
High	G5E8E3	RIKEN cDNA 2310022A10 gene OS=Mus musculus OX=10090 GN=2310022A10Rik PE=1 SV=1	3.402	4	1	1	1	1	413	44.4	10.26	2.49	1
High	A0A0A6YX26	60S ribosomal protein L31 OS=Mus musculus OX=10090 GN=Rpl31 PE=1 SV=1	3.377	18	2	2	2	1	129	15	10.61	3.7	2
High	O88532	Zinc finger RNA-binding protein OS=Mus musculus OX=10090 GN=Zfr PE=1 SV=2	3.139	3	3	3	3	1	1074	116.8	9.04	1.86	3
High	Q8BMB0	BRCA2-interacting transcriptional repressor EMSY OS=Mus musculus OX=10090 GN=Emsy PE=1 SV=2	3.05	1	1	1	1	1	1264	135.2	9.38	2.04	1
High	P62806	Histone H4 OS=Mus musculus OX=10090 GN=H4c1 PE=1 SV=2	3.029	17	2	2	2	1	103	11.4	11.36	4.08	2
High	Q5SXC4	Vascular endothelial zinc finger 1 OS=Mus musculus OX=10090 GN=Vezf1 PE=1 SV=1	3.025	2	1	1	1	1	518	56.5	9.57	2.32	1
High	A6BLY7	Keratin, type I cytoskeletal 28 OS=Mus musculus OX=10090 GN=Krt28 PE=1 SV=1	3.008	3	2	3	1	1	462	50.3	5.29	1.72	2
High	P97477-2	Isoform 2 of Aurora kinase A OS=Mus musculus OX=10090 GN=Aurka	2.894	6	2	2	2	1	417	47.1	9.36	2.1	2
High	Q3U6P5	RRM domain-containing protein OS=Mus musculus OX=10090 GN=Hnrnpc PE=2 SV=1	2.755	6	2	2	2	1	334	36.9	7.36	3.9	2
High	A0A1S6GWJ4	RNA helicase OS=Mus musculus OX=10090 GN=Ddx41 PE=1 SV=1	2.487	3	2	2	2	1	633	71.1	6.83	0	2
High	Q8R1F0	Leydig cell tumor 10 kDa protein homolog OS=Mus musculus OX=10090 GN=D8Ertd738e PE=3 SV=1	2.456	17	2	3	2	1	94	10.2	11.63	3.93	2
High	P28481	Collagen alpha-1(II) chain OS=Mus musculus OX=10090 GN=Col2a1 PE=1 SV=2	2.428	1	1	4	1	1	1487	141.9	6.92	11.39	1
High	Q9CXS4	Centromere protein V OS=Mus musculus OX=10090 GN=Cenpv PE=1 SV=2	2.427	5	1	1	1	1	252	27.5	9.79	1.84	1
High	A0A0B4J1K5	Immunoglobulin lambda variable 3 (Fragment) OS=Mus musculus OX=10090 GN=Iglv3 PE=4 SV=1	2.283	8	1	1	1	1	122	13.4	5.76	2.68	1
High	Q8CJF7	Protein ELYS OS=Mus musculus OX=10090 GN=Ahctf1 PE=1 SV=1	2.242	1	2	2	2	1	2243	247.5	6.55	0	2
High	Q99LX5	Multiple myeloma tumor-associated protein 2 homolog OS=Mus musculus OX=10090 GN=Mmtag2 PE=2 SV=1	2.24	4	1	1	1	1	260	29.3	9.86	2.23	1
High	Q60972	Histone-binding protein RBBP4 OS=Mus musculus OX=10090 GN=Rbbp4 PE=1 SV=5	2.188	3	1	1	1	1	425	47.6	4.89	0	1
High	Q8VH51	RNA-binding protein 39 OS=Mus musculus OX=10090 GN=Rbm39 PE=1 SV=2	2.1	2	1	1	1	1	530	59.4	10.1	1.85	1
High	A0A1S6GWJ8	Uncharacterized protein OS=Mus musculus OX=10090 GN=Hnrnpm PE=2 SV=1	2.05	4	2	3	2	1	809	86.4	9.11	4.02	2
High	Q9ESX4	Nucleolar protein of 40 kDa OS=Mus musculus OX=10090 GN=Zcchc17 PE=1 SV=1	2.042	6	1	1	1	1	241	27.5	9.63	2.69	1
High	Q9WV85	Nucleoside diphosphate kinase 3 OS=Mus musculus OX=10090 GN=Nme3 PE=1 SV=3	1.976	7	1	1	1	1	169	19.1	6.68	0	1
High	Q9D8M4	60S ribosomal protein L7-like 1 OS=Mus musculus OX=10090 GN=Rpl7l1 PE=1 SV=1	1.946	7	1	1	1	1	246	28.5	10.64	0	1
High	P05213	Tubulin alpha-1B chain OS=Mus musculus OX=10090 GN=Tuba1b PE=1 SV=2	1.924	3	1	1	1	1	451	50.1	5.06	1.86	1
High	P62315	Small nuclear ribonucleoprotein Sm D1 OS=Mus musculus OX=10090 GN=Snrpd1 PE=1 SV=1	1.92	11	1	1	1	1	119	13.3	11.56	2.13	1
High	A0A6Q6PUT5	Pre-mRNA-processing factor 40 homolog A (Fragment) OS=Mus musculus OX=10090 GN=Prpf40a PE=1 SV=1	1.804	2	2	2	2	1	966	109.8	8.12	0	2
High	P62889	60S ribosomal protein L30 OS=Mus musculus OX=10090 GN=Rpl30 PE=1 SV=2	1.648	10	1	1	1	1	115	12.8	9.63	2.59	1
High	Q3U8M3	Uncharacterized protein OS=Mus musculus OX=10090 GN=Rpl37a PE=2 SV=1	1.647	12	1	1	1	1	97	10.7	10.67	0	1
High	Q3UBK2	High mobility group protein 1 OS=Mus musculus OX=10090 GN=Hmgb1 PE=2 SV=1	1.604	7	1	1	1	1	215	24.9	5.74	2.35	1
High	Q60749	KH domain-containing, RNA-binding, signal transduction-associated protein 1 OS=Mus musculus OX=10090 GN=Khdrbs1 PE=1 SV=2	1.553	3	1	1	1	1	443	48.3	8.72	2.21	1
High	D3YWN7	Ensconsin OS=Mus musculus OX=10090 GN=Map7 PE=1 SV=2	1.52	1	1	1	1	1	738	82.8	9.38	0	1
High	Q3THH1	Protein disulfide-isomerase A6 OS=Mus musculus OX=10090 GN=Pdia6 PE=2 SV=1	1.501	3	1	1	1	1	445	48.6	5.19	2.11	1
High	B1AUX2	Host cell factor 1 OS=Mus musculus OX=10090 GN=Hcfc1 PE=1 SV=1	1.488	1	1	1	1	1	2090	214.9	6.89	1.62	1
High	Q64012	RNA-binding protein Raly OS=Mus musculus OX=10090 GN=Raly PE=1 SV=3	1.479	3	1	1	1	1	312	33.2	8.84	0	1
High	A0A075B5L7	Immunoglobulin kappa variable 4-80 (Fragment) OS=Mus musculus OX=10090 GN=Igkv4-80 PE=4 SV=2	1.465	14	1	1	1	1	116	12.6	5.15	0	1
High	Q04750	DNA topoisomerase 1 OS=Mus musculus OX=10090 GN=Top1 PE=1 SV=2	1.457	1	1	1	1	1	767	90.8	9.33	1.71	1
High	Q549X6	Synaptotagmin-like protein 4-a OS=Mus musculus OX=10090 GN=Sytl4 PE=2 SV=1	1.453	1	1	1	1	1	673	76	8.84	2.22	1
High	Q9ERZ6	Fidgetin OS=Mus musculus OX=10090 GN=Fign PE=1 SV=1	1.408	1	1	1	1	1	759	82	6.71	2.04	1
High	G3UVU2	Splicing factor 3A subunit 2 OS=Mus musculus OX=10090 GN=Sf3a2 PE=1 SV=1	1.403	4	1	1	1	1	485	51.2	9.64	0	1
High	Q925S1	MRP5 (Fragment) OS=Mus musculus OX=10090 GN=Ighv9-4 PE=2 SV=1	1.394	4	1	1	1	1	218	23	8.78	0	1
High	Q8BQ46	TAF15 RNA polymerase II, TATA box binding protein (TBP)-associated factor OS=Mus musculus OX=10090 GN=Taf15 PE=1 SV=1	1.306	2	1	1	1	1	557	58.6	8.4	0	1
High	Q5BLK2	40S ribosomal protein S20 OS=Mus musculus OX=10090 GN=Rps20 PE=1 SV=1	1.295	9	1	1	1	1	119	13.4	9.94	0	1
High	Q8R326	Paraspeckle component 1 OS=Mus musculus OX=10090 GN=Pspc1 PE=1 SV=1	1.271	2	1	1	1	1	523	58.7	6.67	1.66	1
High	Q9CZI5	40S ribosomal protein S23 OS=Mus musculus OX=10090 GN=Rps23 PE=2 SV=1	1.266	6	1	1	1	1	145	16	10.43	2.39	1
High	A2A7B5	PR domain-containing 2, with ZNF domain OS=Mus musculus OX=10090 GN=Prdm2 PE=1 SV=1	1.254	1	1	1	1	1	1709	187.1	8	0	1
High	P62751	60S ribosomal protein L23a OS=Mus musculus OX=10090 GN=Rpl23a PE=1 SV=1	1.245	5	1	1	1	1	156	17.7	10.45	0	1
Medium	Q64511	DNA topoisomerase 2-beta OS=Mus musculus OX=10090 GN=Top2b PE=1 SV=2	1.188	1	1	1	1	1	1612	181.8	8.29	0	1
Medium	Q3UV20	MAM domain-containing glycosylphosphatidylinositol anchor protein 2 OS=Mus musculus OX=10090 GN=Mdga2 PE=1 SV=1	1.167	2	1	1	1	1	1025	114.9	7.93	2.26	1
Medium	Q3TL53	40S ribosomal protein S6 OS=Mus musculus OX=10090 PE=2 SV=1	1.14	3	1	1	1	1	249	28.7	10.77	0	1
Medium	P11031	Activated RNA polymerase II transcriptional coactivator p15 OS=Mus musculus OX=10090 GN=Sub1 PE=1 SV=3	1.13	9	1	1	1	1	127	14.4	9.6	0	1
Medium	Q91V99	40S ribosomal protein S30 (Fragment) OS=Mus musculus OX=10090 GN=fau PE=3 SV=1	1.065	7	1	1	1	1	137	14.8	10.05	1.99	1
Medium	Q9D611	Osteoclast stimulatory transmembrane protein OS=Mus musculus OX=10090 GN=Ocstamp PE=1 SV=1	1.058	4	1	1	1	1	498	54.5	9.54	0	1
Medium	E9Q557	Desmoplakin OS=Mus musculus OX=10090 GN=Dsp PE=1 SV=1	1.033	0	1	1	1	1	2883	332.7	6.8	0	1
Medium	B1ASA5	Zinc finger protein 362 OS=Mus musculus OX=10090 GN=Zfp362 PE=1 SV=1	1.033	3	1	1	1	1	418	45.6	9.64	0	1
Medium	Q923L3	CUB and sushi domain-containing protein 1 OS=Mus musculus OX=10090 GN=Csmd1 PE=1 SV=2	1.028	1	1	1	1	1	3564	387.6	6.1	0	1
Medium	P61358	60S ribosomal protein L27 OS=Mus musculus OX=10090 GN=Rpl27 PE=1 SV=2	1.023	7	1	1	1	1	136	15.8	10.56	2.03	1
Medium	Q91X42	Aldo-keto reductase family 1, member C12 OS=Mus musculus OX=10090 GN=Akr1c12 PE=2 SV=1	1.003	7	1	1	1	1	323	37	6.64	0	1
Medium	A0A0A6YWG7	Cyclic nucleotide ras GEF OS=Mus musculus OX=10090 GN=Rapgef2 PE=1 SV=1	0.965	2	1	1	1	1	1644	184	6.64	0	1
Medium	B7ZWD6	Chymosin OS=Mus musculus OX=10090 GN=Cym PE=2 SV=1	0.932	5	1	1	1	1	379	42.5	6.23	2.02	1
Medium	A2AQ07	Tubulin beta-1 chain OS=Mus musculus OX=10090 GN=Tubb1 PE=1 SV=1	0.901	2	1	1	1	1	451	50.4	5.07	1.6	1
Medium	F6XI62	60S ribosomal protein L7 (Fragment) OS=Mus musculus OX=10090 GN=Rpl7 PE=1 SV=1	0.888	4	1	1	1	1	279	32.5	11.12	0	1
Medium	A0A0R5RP39	Sodium channel protein OS=Mus musculus OX=10090 GN=Scn11a PE=2 SV=1	0.885	1	1	2	1	1	1765	201.2	8.29	1.82	1
Medium	P56931	Transcription factor E2F2 OS=Mus musculus OX=10090 GN=E2f2 PE=1 SV=2	0.884	2	1	1	1	1	443	48.5	4.88	2.07	1
Medium	B9EKF9	DUF4209 domain-containing protein OS=Mus musculus OX=10090 GN=Ermard PE=2 SV=1	0.86	3	1	1	1	1	622	70.3	6.71	2.26	1
Medium	P47963	60S ribosomal protein L13 OS=Mus musculus OX=10090 GN=Rpl13 PE=1 SV=3	0.851	4	1	1	1	1	211	24.3	11.55	1.61	1
Medium	Q3U2U3	Uncharacterized protein OS=Mus musculus OX=10090 GN=F630201L12Rik PE=2 SV=1	0.844	8	1	1	1	1	207	22.7	8.12	2.95	1

## Sheet: Brd4 IP 2
Protein FDR Confidence: Combined	Accession	Description	Sum PEP Score	Coverage [%]	# Peptides	# PSMs	# Unique Peptides	# Protein Groups	# AAs	MW [kDa]	calc. pI	Score Sequest HT: Sequest HT	# Peptides (by Search Engine): Sequest HT
High	E9PVX6	Proliferation marker protein Ki-67 OS=Mus musculus OX=10090 GN=Mki67 PE=1 SV=1	979.734	70	222	469	222	1	3177	350.7	9.72	1205.4	222
High	E9Q7G0	Nuclear mitotic apparatus protein 1 OS=Mus musculus OX=10090 GN=Numa1 PE=1 SV=1	454.216	63	114	214	76	1	2094	235.5	5.87	545.38	114
High	Q6P4T2	U5 small nuclear ribonucleoprotein 200 kDa helicase OS=Mus musculus OX=10090 GN=Snrnp200 PE=1 SV=1	300.345	53	92	110	92	1	2136	244.4	6.06	272.69	92
High	Q99PV0	Pre-mRNA-processing-splicing factor 8 OS=Mus musculus OX=10090 GN=Prpf8 PE=1 SV=2	255.739	47	85	96	85	1	2335	273.4	8.84	223.7	85
High	E9QNN1	DEAH box protein 9 OS=Mus musculus OX=10090 GN=Dhx9 PE=1 SV=1	255.685	50	59	120	1	1	1384	149.6	6.83	323.85	59
High	A0A087WPL5	DEAH box protein 9 OS=Mus musculus OX=10090 GN=Dhx9 PE=1 SV=1	254.867	50	59	119	1	1	1383	149.5	6.83	318.7	59
High	Q3UH70	Bromodomain-containing protein 4 OS=Mus musculus OX=10090 GN=Brd4 PE=1 SV=1	195.096	44	48	108	33	1	1401	156	9.2	274.11	48
High	P70399	TP53-binding protein 1 OS=Mus musculus OX=10090 GN=Tp53bp1 PE=1 SV=3	177.003	42	46	56	28	1	1969	212.6	4.63	149.06	46
High	Q8CE30	Nucleolin OS=Mus musculus OX=10090 GN=Ncl PE=2 SV=1	174.485	51	49	134	3	1	707	76.7	4.77	307.02	49
High	P09405	Nucleolin OS=Mus musculus OX=10090 GN=Ncl PE=1 SV=2	170.8	51	49	133	3	1	707	76.7	4.75	303.3	49
High	F6ZQA3	Nuclear mitotic apparatus protein 1 (Fragment) OS=Mus musculus OX=10090 GN=Numa1 PE=1 SV=1	168.221	63	41	76	3	1	741	82.8	9.44	190.31	41
High	G3X956	FACT complex subunit OS=Mus musculus OX=10090 GN=Supt16 PE=1 SV=1	161.313	47	49	79	49	1	1047	119.8	5.66	170.67	49
High	G5E866	Splicing factor 3B subunit 1 OS=Mus musculus OX=10090 GN=Sf3b1 PE=1 SV=1	155.731	49	47	62	47	1	1304	145.7	7.09	156.8	47
High	Q6A0E3	116 kDa U5 small nuclear ribonucleoprotein component (Fragment) OS=Mus musculus OX=10090 GN=Eftud2 PE=2 SV=1	146.892	60	40	53	40	1	976	109.7	5	140.45	40
High	Q921K2	Poly [ADP-ribose] polymerase OS=Mus musculus OX=10090 GN=Parp1 PE=1 SV=1	146.666	49	45	59	45	1	1014	112.7	8.95	157.99	45
High	S4R1M2	Scaffold attachment factor B1 OS=Mus musculus OX=10090 GN=Safb PE=1 SV=1	137.973	45	42	59	29	1	939	105.3	5.38	152.72	42
High	Q80TU6	MKIAA0670 protein (Fragment) OS=Mus musculus OX=10090 GN=Acin1 PE=2 SV=1	128.354	39	38	61	4	1	1266	142.8	5.63	122.12	38
High	A0A068BFR6	Kinesin-like protein OS=Mus musculus OX=10090 GN=Kifc1 PE=2 SV=1	128.346	62	37	52	16	1	674	74.1	8.72	146.36	37
High	Q80WE4	Kinesin-like protein KIF20B OS=Mus musculus OX=10090 GN=Kif20b PE=1 SV=3	127.82	30	47	50	47	1	1774	203.4	5.78	95.21	47
High	Q8BTI8	Serine/arginine repetitive matrix protein 2 OS=Mus musculus OX=10090 GN=Srrm2 PE=1 SV=3	126.915	19	37	50	37	1	2703	294.7	12.03	123.53	37
High	Q01320	DNA topoisomerase 2-alpha OS=Mus musculus OX=10090 GN=Top2a PE=1 SV=2	123.233	33	43	55	34	1	1528	172.7	8.6	101.74	43
High	Q3TEA8-2	Isoform 2 of Heterochromatin protein 1-binding protein 3 OS=Mus musculus OX=10090 GN=Hp1bp3	122.002	51	32	56	1	1	541	59.5	9.79	132.17	32
High	B2RSV4	Splicing factor 3b, subunit 3 OS=Mus musculus OX=10090 GN=Sf3b3 PE=2 SV=1	121.795	38	35	50	35	1	1217	135.5	5.26	123.67	35
High	Q9JIX8-4	Isoform 4 of Apoptotic chromatin condensation inducer in the nucleus OS=Mus musculus OX=10090 GN=Acin1	120.819	37	36	55	1	1	1298	146.2	6.13	108.45	36
High	Q3TEA8	Heterochromatin protein 1-binding protein 3 OS=Mus musculus OX=10090 GN=Hp1bp3 PE=1 SV=1	119.315	52	32	57	1	1	554	60.8	9.7	132.36	32
High	Q9Z204-2	Isoform C1 of Heterogeneous nuclear ribonucleoproteins C1/C2 OS=Mus musculus OX=10090 GN=Hnrnpc	112.643	62	29	61	3	1	300	33	5.03	153.44	29
High	Q3U6P5	RRM domain-containing protein OS=Mus musculus OX=10090 GN=Hnrnpc PE=2 SV=1	109.674	59	29	59	0	1	334	36.9	7.36	156.37	29
High	Q7TPV4	Myb-binding protein 1A OS=Mus musculus OX=10090 GN=Mybbp1a PE=1 SV=2	109.209	34	37	41	37	1	1344	151.9	8.95	86.91	37
High	Q9D8E6	60S ribosomal protein L4 OS=Mus musculus OX=10090 GN=Rpl4 PE=1 SV=3	104.635	51	28	56	28	1	419	47.1	11	119.52	28
High	Q62018	RNA polymerase-associated protein CTR9 homolog OS=Mus musculus OX=10090 GN=Ctr9 PE=1 SV=2	103.89	36	34	41	34	1	1173	133.3	6.49	92.69	34
High	Q569Z6	Thyroid hormone receptor-associated protein 3 OS=Mus musculus OX=10090 GN=Thrap3 PE=1 SV=1	103.763	34	32	50	32	1	951	108.1	10.17	113.11	32
High	Q6NS46	Protein RRP5 homolog OS=Mus musculus OX=10090 GN=Pdcd11 PE=1 SV=2	102.912	25	37	40	37	1	1862	207.6	8.75	73.59	37
High	P29341	Polyadenylate-binding protein 1 OS=Mus musculus OX=10090 GN=Pabpc1 PE=1 SV=2	102.819	57	31	45	21	1	636	70.6	9.5	96.1	31
High	Q5SQB7	Nucleophosmin OS=Mus musculus OX=10090 GN=Npm1 PE=1 SV=1	101.994	60	20	54	20	1	292	32.5	4.77	133.53	20
High	Q9Z204-5	Isoform 5 of Heterogeneous nuclear ribonucleoproteins C1/C2 OS=Mus musculus OX=10090 GN=Hnrnpc	101.367	62	28	51	1	1	306	33.6	5.08	138.95	28
High	Q8BVE8-2	Isoform 2 of Histone-lysine N-methyltransferase NSD2 OS=Mus musculus OX=10090 GN=Nsd2	100.15	32	33	35	33	1	1366	152.3	8.51	77	33
High	Q8K224	RNA cytidine acetyltransferase OS=Mus musculus OX=10090 GN=Nat10 PE=1 SV=1	98.404	41	36	38	36	1	1024	115.3	8.32	70.64	36
High	P27659	60S ribosomal protein L3 OS=Mus musculus OX=10090 GN=Rpl3 PE=1 SV=3	96.47	56	24	48	22	1	403	46.1	10.21	108.37	24
High	Q6ZQ61	MKIAA0723 protein (Fragment) OS=Mus musculus OX=10090 GN=Matr3 PE=2 SV=1	94.643	43	28	36	28	1	852	95.2	6.27	89.04	28
High	Q1WWK3	Hist1h1b protein (Fragment) OS=Mus musculus OX=10090 GN=H1f5 PE=2 SV=1	91.691	55	22	55	15	1	222	22.4	10.92	152.71	22
High	Q62383	Transcription elongation factor SPT6 OS=Mus musculus OX=10090 GN=Supt6h PE=1 SV=2	90.477	25	35	39	35	1	1726	199	4.93	70.18	35
High	D3YYT1	Glyoxylate reductase 1 homolog OS=Mus musculus OX=10090 GN=Glyr1 PE=1 SV=1	89.864	52	18	39	18	1	552	60.4	9.13	119.2	18
High	B2RRX1	Actin, beta OS=Mus musculus OX=10090 GN=Actb PE=2 SV=1	89.159	66	18	43	2	1	375	41.7	5.48	104.98	18
High	Q3UAI4	SAP domain-containing protein OS=Mus musculus OX=10090 GN=Sf3b2 PE=2 SV=1	88.56	38	29	39	29	1	878	98.1	5.58	65.41	29
High	P68040	Receptor of activated protein C kinase 1 OS=Mus musculus OX=10090 GN=Rack1 PE=1 SV=3	87.978	74	17	33	17	1	317	35.1	7.69	98.61	17
High	A0A0R4J098	Zinc finger protein 326 OS=Mus musculus OX=10090 GN=Zfp326 PE=1 SV=1	87.877	49	23	35	23	1	580	65.1	5.21	87.6	23
High	Q69Z99	Zinc finger protein 512 OS=Mus musculus OX=10090 GN=Znf512 PE=2 SV=2	87.03	55	27	32	27	1	562	63.9	9.51	78.54	27
High	Q3V0Z8	DEAD box protein 5 (Fragment) OS=Mus musculus OX=10090 GN=Ddx5 PE=2 SV=1	85.791	38	28	47	22	1	690	76.7	8.6	103.3	28
High	Q3UBP6	Uncharacterized protein OS=Mus musculus OX=10090 GN=Actb PE=2 SV=1	84.435	62	17	38	1	1	375	41.7	5.48	94.08	17
High	A2AWT5	Nucleolar transcription factor 1 OS=Mus musculus OX=10090 GN=Ubtf PE=1 SV=1	83.59	41	28	42	28	1	764	89.4	5.81	85.17	28
High	E9Q5G3	Kinesin-like protein KIF23 OS=Mus musculus OX=10090 GN=Kif23 PE=1 SV=1	82.924	40	27	31	27	1	953	108.7	8.66	68	27
High	Q571G8	MKIAA1649 protein (Fragment) OS=Mus musculus OX=10090 GN=Poldip3 PE=2 SV=1	82.83	58	22	36	22	1	453	49.7	10.42	89.78	22
High	P99024	Tubulin beta-5 chain OS=Mus musculus OX=10090 GN=Tubb5 PE=1 SV=1	82.247	64	19	39	4	1	444	49.6	4.89	99.04	19
High	P15864	Histone H1.2 OS=Mus musculus OX=10090 GN=H1-2 PE=1 SV=2	81.218	44	22	75	12	1	212	21.3	11	201.03	22
High	A0A1S6GWJ8	Uncharacterized protein OS=Mus musculus OX=10090 GN=Hnrnpm PE=2 SV=1	80.841	43	31	38	31	1	809	86.4	9.11	82.53	31
High	Q00PI9	Heterogeneous nuclear ribonucleoprotein U-like protein 2 OS=Mus musculus OX=10090 GN=Hnrnpul2 PE=1 SV=2	80.059	37	24	29	24	1	745	84.9	4.89	67.12	24
High	Q99ME9	GTP-binding protein 4 OS=Mus musculus OX=10090 GN=Gtpbp4 PE=1 SV=3	80.048	50	30	35	30	1	634	74.1	9.52	61.23	30
High	P97351	40S ribosomal protein S3a OS=Mus musculus OX=10090 GN=Rps3a PE=1 SV=3	79.323	71	23	45	23	1	264	29.9	9.73	76.94	23
High	Q8K4Z5	Splicing factor 3A subunit 1 OS=Mus musculus OX=10090 GN=Sf3a1 PE=1 SV=1	79.178	39	26	33	26	1	791	88.5	5.22	76.77	26
High	F8WI22	Bcl-2-associated transcription factor 1 OS=Mus musculus OX=10090 GN=Bclaf1 PE=1 SV=1	77.529	30	27	31	27	1	870	100.2	9.96	56.24	27
High	Q08943-2	Isoform 2 of FACT complex subunit SSRP1 OS=Mus musculus OX=10090 GN=Ssrp1	77.505	43	25	37	25	1	713	81.4	7.01	78.33	25
High	A2APB8	Targeting protein for Xklp2 OS=Mus musculus OX=10090 GN=Tpx2 PE=1 SV=1	76.522	39	27	31	27	1	745	85.8	9.38	52.48	27
High	Q9JIX8-3	Isoform 3 of Apoptotic chromatin condensation inducer in the nucleus OS=Mus musculus OX=10090 GN=Acin1	75.483	51	21	33	1	1	565	65.3	8.63	66.68	21
High	P43275	Histone H1.1 OS=Mus musculus OX=10090 GN=H1-1 PE=1 SV=2	74.721	39	15	68	13	1	213	21.8	10.93	194.35	15
High	Q3TUQ5	Pinin OS=Mus musculus OX=10090 GN=Pnn PE=1 SV=1	73.742	34	24	32	24	1	726	82.5	7.01	53.67	24
High	Q9DBY8	Nuclear valosin-containing protein-like OS=Mus musculus OX=10090 GN=Nvl PE=1 SV=1	72.71	37	24	27	24	1	855	94.4	6.35	56.44	24
High	B2RQQ5	Microtubule-associated protein 1B OS=Mus musculus OX=10090 GN=Map1b PE=2 SV=1	72.395	14	25	27	25	1	2464	270.1	4.83	50.88	25
High	C7G3P2	PRP4 pre-mRNA-processing factor 4 homolog (Fragment) OS=Mus musculus OX=10090 GN=Prpf4b PE=2 SV=1	71.835	23	21	25	21	1	1011	117.4	10.23	45.75	21
High	Q80YR5	Scaffold attachment factor B2 OS=Mus musculus OX=10090 GN=Safb2 PE=1 SV=2	70.983	25	22	28	9	1	991	111.8	6.38	71.01	22
High	Q3U741	RNA helicase OS=Mus musculus OX=10090 GN=Ddx17 PE=1 SV=1	70.737	37	22	35	16	1	652	72.5	8.68	70.01	22
High	Q3TFE5	RNA helicase OS=Mus musculus OX=10090 GN=Dhx15 PE=2 SV=1	70.197	35	24	29	23	1	795	91	7.44	60.91	24
High	Q8BLA0	Uncharacterized protein (Fragment) OS=Mus musculus OX=10090 GN=Trp53bp1 PE=2 SV=1	69.556	37	19	24	1	1	1013	109	4.25	59.08	19
High	Q91VC3	Eukaryotic initiation factor 4A-III OS=Mus musculus OX=10090 GN=Eif4a3 PE=1 SV=3	69.427	59	24	32	21	1	411	46.8	6.73	75.42	24
High	Q91YR7	Pre-mRNA-processing factor 6 OS=Mus musculus OX=10090 GN=Prpf6 PE=1 SV=1	69.374	31	25	31	25	1	941	106.7	8.09	59.39	25
High	A0A0N4SV80	Zinc finger protein 638 OS=Mus musculus OX=10090 GN=Zfp638 PE=1 SV=1	69.115	18	26	28	26	1	1926	214.3	6.76	37.37	26
High	P20029	Endoplasmic reticulum chaperone BiP OS=Mus musculus OX=10090 GN=Hspa5 PE=1 SV=3	69.111	38	22	28	20	1	655	72.4	5.16	67.05	22
High	Q3TQX5	RNA helicase OS=Mus musculus OX=10090 GN=Ddx3x PE=1 SV=1	68.775	40	20	24	19	1	662	73.1	7.18	60.11	20
High	P47962	60S ribosomal protein L5 OS=Mus musculus OX=10090 GN=Rpl5 PE=1 SV=3	68.734	48	19	41	19	1	297	34.4	9.77	71.78	19
High	Q80UT7	60S ribosomal protein L7a (Fragment) OS=Mus musculus OX=10090 GN=Rpl7a PE=2 SV=1	68.518	52	18	40	18	1	270	30.5	10.55	82.85	18
High	P68372	Tubulin beta-4B chain OS=Mus musculus OX=10090 GN=Tubb4b PE=1 SV=1	68.194	54	17	31	3	1	445	49.8	4.89	80.79	17
High	P14148	60S ribosomal protein L7 OS=Mus musculus OX=10090 GN=Rpl7 PE=1 SV=2	67.953	53	21	35	21	1	270	31.4	10.89	70.85	21
High	Q7JJ13	Bromodomain-containing protein 2 OS=Mus musculus OX=10090 GN=Brd2 PE=1 SV=1	67.464	40	24	29	20	1	798	88	9.13	47.24	24
High	Q9Z277	Tyrosine-protein kinase BAZ1B OS=Mus musculus OX=10090 GN=Baz1b PE=1 SV=2	67.147	19	24	24	24	1	1479	170.5	8.6	52.66	24
High	Q61687	Transcriptional regulator ATRX OS=Mus musculus OX=10090 GN=Atrx PE=1 SV=3	66.761	12	26	28	26	1	2476	278.4	6.68	31.43	26
High	Q5BJ94	Kifc1 protein OS=Mus musculus OX=10090 GN=Kifc1 PE=2 SV=1	66.635	54	25	29	4	1	497	55	8.32	65.2	25
High	P43274	Histone H1.4 OS=Mus musculus OX=10090 GN=H1-4 PE=1 SV=2	66.578	42	18	60	5	1	219	22	11.11	130.18	18
High	P63017	Heat shock cognate 71 kDa protein OS=Mus musculus OX=10090 GN=Hspa8 PE=1 SV=1	66.438	36	21	27	18	1	646	70.8	5.52	51.69	21
High	Q6ZPW1	MKIAA1196 protein (Fragment) OS=Mus musculus OX=10090 GN=Zfp512b PE=2 SV=1	66.352	36	18	29	18	1	883	96.5	9.76	66.79	18
High	Q52L97	Importin subunit alpha OS=Mus musculus OX=10090 GN=Kpna2 PE=1 SV=1	66.271	50	19	28	19	1	529	57.9	5.68	86.83	19
High	G3UWQ7	Protein regulator of cytokinesis 1 OS=Mus musculus OX=10090 GN=Prc1 PE=1 SV=1	64.238	40	18	21	1	1	620	72	7.75	57.24	18
High	Q5YLW3	40S ribosomal protein S3 OS=Mus musculus OX=10090 GN=Rps3 PE=1 SV=1	63.949	75	19	41	19	1	243	26.7	9.66	101.52	19
High	G3UY19	Protein regulator of cytokinesis 1 OS=Mus musculus OX=10090 GN=Prc1 PE=1 SV=1	63.812	42	18	21	1	1	566	66.5	7.93	57.28	18
High	P99027	60S acidic ribosomal protein P2 OS=Mus musculus OX=10090 GN=Rplp2 PE=1 SV=3	63.61	83	12	25	12	1	115	11.6	4.54	79.69	12
High	Q3UCF2	Uncharacterized protein OS=Mus musculus OX=10090 GN=Cdc5l PE=1 SV=1	63.601	36	19	23	19	1	802	92.1	8.02	57.46	19
High	G3UW86	Protein regulator of cytokinesis 1 OS=Mus musculus OX=10090 GN=Prc1 PE=1 SV=1	62.975	39	18	21	1	1	606	70.6	7.9	56.6	18
High	Q9EPU0	Regulator of nonsense transcripts 1 OS=Mus musculus OX=10090 GN=Upf1 PE=1 SV=2	62.863	26	24	24	24	1	1124	123.9	6.61	37.62	24
High	Q91W39	Nuclear receptor coactivator 5 OS=Mus musculus OX=10090 GN=Ncoa5 PE=1 SV=1	62.567	46	19	26	5	1	579	65.3	9.82	53.25	19
High	Q99KP6	Pre-mRNA-processing factor 19 OS=Mus musculus OX=10090 GN=Prpf19 PE=1 SV=1	62.149	63	16	25	16	1	504	55.2	6.61	72.94	16
High	P47911	60S ribosomal protein L6 OS=Mus musculus OX=10090 GN=Rpl6 PE=1 SV=3	61.641	54	20	45	17	1	296	33.5	10.7	104.6	20
High	P62702	40S ribosomal protein S4, X isoform OS=Mus musculus OX=10090 GN=Rps4x PE=1 SV=2	61.104	56	16	37	16	1	263	29.6	10.15	84.18	16
High	Q9D6Z1	Nucleolar protein 56 OS=Mus musculus OX=10090 GN=Nop56 PE=1 SV=2	61.047	41	19	22	19	1	580	64.4	9.14	52.45	19
High	Q3TWW8	Serine/arginine-rich splicing factor 6 OS=Mus musculus OX=10090 GN=Srsf6 PE=1 SV=1	60.992	36	17	28	13	1	339	39	11.46	65.44	17
High	Q3UAC4	RNA helicase OS=Mus musculus OX=10090 GN=Ddx41 PE=2 SV=1	60.874	40	23	27	23	1	622	69.7	6.61	49.08	23
High	G5E896	Enhancer of mRNA-decapping protein 4 OS=Mus musculus OX=10090 GN=Edc4 PE=1 SV=1	60.838	23	20	21	20	1	1406	152.4	5.82	46.68	20
High	Q32P04	Keratin 5 OS=Mus musculus OX=10090 GN=Krt5 PE=1 SV=2	60.706	24	22	36	6	1	580	61.7	7.75	70.22	22
High	Q8K2T8	RNA polymerase II-associated factor 1 homolog OS=Mus musculus OX=10090 GN=Paf1 PE=1 SV=1	60.611	46	19	21	19	1	535	60.5	4.65	54.44	19
High	Q91ZW3	SWI/SNF-related matrix-associated actin-dependent regulator of chromatin subfamily A member 5 OS=Mus musculus OX=10090 GN=Smarca5 PE=1 SV=1	60.255	24	26	26	26	1	1051	121.6	8.15	40.34	26
High	Q9ERH4	Nucleolar and spindle-associated protein 1 OS=Mus musculus OX=10090 GN=Nusap1 PE=1 SV=1	60.242	43	18	33	18	1	427	48.5	9.89	78.5	18
High	Q61213	Protease OS=Mus musculus OX=10090 GN=gag PE=2 SV=1	59.845	24	17	31	1	1	827	91.6	9.29	74.88	17
High	Q3UL54	Uncharacterized protein OS=Mus musculus OX=10090 GN=Rsl1d1 PE=2 SV=1	59.678	51	18	23	18	1	465	51.9	9.98	57.35	18
High	H9KV00	Protein SON OS=Mus musculus OX=10090 GN=Son PE=1 SV=1	59.411	14	23	24	23	1	2477	268.7	5.71	39.03	23
High	Q3TI79	PUA domain-containing protein OS=Mus musculus OX=10090 GN=Dkc1 PE=2 SV=1	59.37	46	16	18	11	1	509	57.4	9.28	47.47	16
High	Q7TMM9	Tubulin beta-2A chain OS=Mus musculus OX=10090 GN=Tubb2a PE=1 SV=1	59.279	47	15	28	3	1	445	49.9	4.89	68.73	15
High	P62918	60S ribosomal protein L8 OS=Mus musculus OX=10090 GN=Rpl8 PE=1 SV=2	59.184	56	13	30	13	1	257	28	11.03	87.34	13
High	Q8JZM7	Parafibromin OS=Mus musculus OX=10090 GN=Cdc73 PE=1 SV=1	57.994	46	22	22	22	1	531	60.5	9.61	46.85	22
High	Q6DFW4	Nucleolar protein 58 OS=Mus musculus OX=10090 GN=Nop58 PE=1 SV=1	57.88	41	17	20	17	1	536	60.3	8.34	43.44	17
High	P08775	DNA-directed RNA polymerase II subunit RPB1 OS=Mus musculus OX=10090 GN=Polr2a PE=1 SV=3	57.593	13	21	22	21	1	1970	217	7.37	36.63	21
High	Q8K363	ATP-dependent RNA helicase DDX18 OS=Mus musculus OX=10090 GN=Ddx18 PE=1 SV=1	57.588	30	16	19	16	1	660	74.1	9.52	44.74	16
High	P14733	Lamin-B1 OS=Mus musculus OX=10090 GN=Lmnb1 PE=1 SV=3	57.101	36	20	24	19	1	588	66.7	5.16	47.9	20
High	P62242	40S ribosomal protein S8 OS=Mus musculus OX=10090 GN=Rps8 PE=1 SV=2	56.955	60	17	31	17	1	208	24.2	10.32	70	17
High	Q3TL20	40S ribosomal protein S2 OS=Mus musculus OX=10090 GN=Rps2 PE=2 SV=1	56.673	51	15	29	2	1	293	31.2	10.3	70.92	15
High	P25444	40S ribosomal protein S2 OS=Mus musculus OX=10090 GN=Rps2 PE=1 SV=3	56.673	51	15	29	2	1	293	31.2	10.24	70.92	15
High	Q8VDM6	Heterogeneous nuclear ribonucleoprotein U-like protein 1 OS=Mus musculus OX=10090 GN=Hnrnpul1 PE=1 SV=1	56.257	27	20	21	20	1	859	95.9	6.58	38.91	20
High	Q8CGC6	RNA-binding protein 28 OS=Mus musculus OX=10090 GN=Rbm28 PE=1 SV=4	56.04	30	21	24	6	1	750	84.2	9.54	47.86	21
High	Q6PHQ9	Polyadenylate-binding protein OS=Mus musculus OX=10090 GN=Pabpc4 PE=1 SV=1	55.847	34	21	24	11	1	660	72.2	9.39	41.39	21
High	Q64012-2	Isoform 1 of RNA-binding protein Raly OS=Mus musculus OX=10090 GN=Raly	55.556	57	18	29	18	1	296	31.2	9.38	63.01	18
High	Q5BLK1	40S ribosomal protein S6 OS=Mus musculus OX=10090 GN=Rps6 PE=1 SV=1	55.34	44	15	25	15	1	249	28.7	10.84	56.87	15
High	B2CY77	Laminin receptor (Fragment) OS=Mus musculus OX=10090 GN=Rpsa PE=2 SV=1	55.239	58	13	20	13	1	295	32.8	4.87	61.3	13
High	P68369	Tubulin alpha-1A chain OS=Mus musculus OX=10090 GN=Tuba1a PE=1 SV=1	55.066	50	17	24	7	1	451	50.1	5.06	59.37	17
High	Q542V3	Serine/arginine-rich-splicing factor 4 OS=Mus musculus OX=10090 GN=Srsf4 PE=1 SV=1	54.737	29	16	24	12	1	491	56.2	11.37	50.44	16
High	A0A0N4SUH4	Pumilio homolog 3 OS=Mus musculus OX=10090 GN=Pum3 PE=1 SV=1	54.697	35	18	21	18	1	648	72.9	9.66	43.32	18
High	P03975	IgE-binding protein OS=Mus musculus OX=10090 GN=Iap PE=2 SV=1	54.05	32	16	32	2	1	557	62.7	9.31	75.58	16
High	A0A0R4J1A6	GAS2-like protein 3 OS=Mus musculus OX=10090 GN=Gas2l3 PE=1 SV=1	53.887	35	16	18	16	1	683	74.2	9.6	34.23	16
High	Q9Z315	U4/U6.U5 tri-snRNP-associated protein 1 OS=Mus musculus OX=10090 GN=Sart1 PE=1 SV=1	53.746	31	17	17	17	1	806	90.8	5.82	39.42	17
High	Q8BT90	40S ribosomal protein S17 (Fragment) OS=Mus musculus OX=10090 GN=Rps17 PE=2 SV=1	53.531	60	12	17	12	1	141	16.1	9.94	50.28	12
High	Q6NV83	U2 snRNP-associated SURP motif-containing protein OS=Mus musculus OX=10090 GN=U2surp PE=1 SV=3	53.463	23	19	22	19	1	1029	118.2	8.47	44.51	19
High	A0A6Q6PUT5	Pre-mRNA-processing factor 40 homolog A (Fragment) OS=Mus musculus OX=10090 GN=Prpf40a PE=1 SV=1	53.43	22	18	20	16	1	966	109.8	8.12	40.15	18
High	Q80ZA1	Cellular tumor antigen p53 OS=Mus musculus OX=10090 GN=Trp53 PE=1 SV=1	52.481	55	17	29	17	1	381	42.4	6.25	70.39	17
High	P32067	Lupus La protein homolog OS=Mus musculus OX=10090 GN=Ssb PE=1 SV=1	52.172	49	19	20	19	1	415	47.7	9.77	43.24	19
High	P23116	Eukaryotic translation initiation factor 3 subunit A OS=Mus musculus OX=10090 GN=Eif3a PE=1 SV=5	51.979	18	23	26	23	1	1344	161.8	6.77	30.87	23
High	Q91VM5	RNA binding motif protein, X-linked-like-1 OS=Mus musculus OX=10090 GN=Rbmxl1 PE=2 SV=1	51.761	48	18	24	5	1	388	42.1	9.99	49.87	18
High	Q8BJ05	Zinc finger CCCH domain-containing protein 14 OS=Mus musculus OX=10090 GN=Zc3h14 PE=1 SV=1	51.634	35	19	23	19	1	735	82.4	7.37	36.78	19
High	Q3TVV6	Uncharacterized protein OS=Mus musculus OX=10090 GN=Hnrnpu PE=2 SV=1	51.44	29	18	24	18	1	800	87.9	6.24	42.96	18
High	P62806	Histone H4 OS=Mus musculus OX=10090 GN=H4c1 PE=1 SV=2	50.954	62	14	27	14	1	103	11.4	11.36	63.89	14
High	Q3U1C2	RuvB-like helicase OS=Mus musculus OX=10090 GN=Ruvbl1 PE=1 SV=1	50.9	45	15	17	15	1	456	50.2	6.42	48.42	15
High	B2M1R6	Heterogeneous nuclear ribonucleoprotein K OS=Mus musculus OX=10090 GN=Hnrnpk PE=1 SV=1	50.825	43	16	20	16	1	440	48.5	5.54	46.94	16
High	Q8CIJ3	Eukaryotic translation initiation factor 3 subunit B OS=Mus musculus OX=10090 GN=Eif3b PE=2 SV=1	50.791	24	16	19	16	1	970	108.9	5.54	39.23	16
High	Q3UXP2	RuvB-like helicase OS=Mus musculus OX=10090 GN=Ruvbl2 PE=2 SV=1	50.068	43	16	19	16	1	463	51.1	5.64	50.79	16
High	B2RY56	RNA-binding protein 25 OS=Mus musculus OX=10090 GN=Rbm25 PE=1 SV=2	49.139	25	20	22	20	1	838	99.5	6.32	43.14	20
High	Q6PCP0	RNA helicase OS=Mus musculus OX=10090 GN=Ddx21 PE=2 SV=1	49.137	24	17	17	17	1	851	93.5	9.09	33.94	17
High	Q8R5K4	Nucleolar protein 6 OS=Mus musculus OX=10090 GN=Nol6 PE=2 SV=2	49.038	20	16	18	16	1	1152	129.1	6.79	36.09	16
High	Q60737	Casein kinase II subunit alpha OS=Mus musculus OX=10090 GN=Csnk2a1 PE=1 SV=2	48.848	42	14	17	13	1	391	45.1	7.74	47.03	14
High	O88569	Heterogeneous nuclear ribonucleoproteins A2/B1 OS=Mus musculus OX=10090 GN=Hnrnpa2b1 PE=1 SV=2	48.84	45	14	22	12	1	353	37.4	8.95	58.7	14
High	Q7TS74	Cytoskeleton-associated protein 2-like OS=Mus musculus OX=10090 GN=Ckap2l PE=1 SV=1	48.667	25	15	16	15	1	745	82.9	9.69	33.09	15
High	Q5FWB6	60S acidic ribosomal protein P0 OS=Mus musculus OX=10090 GN=Rplp0 PE=2 SV=1	48.458	60	14	20	14	1	317	34.2	6.25	62.89	14
High	Q8R2W6	RNA binding motif protein 28 OS=Mus musculus OX=10090 GN=Rbm28 PE=2 SV=1	48.451	38	18	21	3	1	500	56.3	9.64	39.38	18
High	D3Z0M9	RNA helicase OS=Mus musculus OX=10090 GN=Ddx23 PE=1 SV=1	48.066	25	20	20	20	1	819	95.4	9.58	30.32	20
High	Q80V08	60S ribosomal protein L17 (Fragment) OS=Mus musculus OX=10090 GN=Rpl17 PE=2 SV=1	47.989	53	12	28	12	1	194	22.4	10.33	58.63	12
High	B1AVB1	Scm polycomb group protein-like 2 OS=Mus musculus OX=10090 GN=Scml2 PE=1 SV=1	47.727	27	13	17	13	1	825	89.5	9.23	40.04	13
High	P62960	Y-box-binding protein 1 OS=Mus musculus OX=10090 GN=Ybx1 PE=1 SV=3	47.704	53	13	16	13	1	322	35.7	9.88	37.91	13
High	Q3UYV9	Nuclear cap-binding protein subunit 1 OS=Mus musculus OX=10090 GN=Ncbp1 PE=1 SV=2	47.443	26	15	15	15	1	790	91.9	6.64	32.52	15
High	P53569	CCAAT/enhancer-binding protein zeta OS=Mus musculus OX=10090 GN=Cebpz PE=1 SV=2	47.164	19	17	19	17	1	1052	120.2	5.74	31.94	17
High	Q7TQ39	Gag protein OS=Mus musculus OX=10090 GN=gag PE=4 SV=1	47.042	28	15	20	2	1	586	65.4	8.75	46.96	15
High	P35550	rRNA 2'-O-methyltransferase fibrillarin OS=Mus musculus OX=10090 GN=Fbl PE=1 SV=2	47.008	54	14	20	14	1	327	34.3	10.24	52.62	14
High	Q9DB79	40S ribosomal protein S11 OS=Mus musculus OX=10090 GN=Rps11 PE=2 SV=1	46.898	51	14	23	14	1	166	19.4	10.14	52.15	14
High	P47963	60S ribosomal protein L13 OS=Mus musculus OX=10090 GN=Rpl13 PE=1 SV=3	46.588	47	14	21	14	1	211	24.3	11.55	48.38	14
High	E9QN31	Probable 28S rRNA (cytosine-C(5))-methyltransferase OS=Mus musculus OX=10090 GN=Nop2 PE=1 SV=1	46.046	24	15	22	8	1	794	86.9	9.19	42.89	15
High	Q922V4	Pleiotropic regulator 1 OS=Mus musculus OX=10090 GN=Plrg1 PE=1 SV=1	45.643	45	15	16	15	1	513	56.9	9.17	39.81	15
High	A0A158SIT8	Modulator of non-genomic activity of estrogen receptor OS=Mus musculus OX=10090 GN=Pelp1 PE=3 SV=1	45.436	17	14	17	14	1	1123	118	4.36	47.74	14
High	B7ZC24	Nuclear receptor coactivator 5 OS=Mus musculus OX=10090 GN=Ncoa5 PE=1 SV=1	45.422	37	15	21	1	1	406	48	9.69	32.98	15
High	Q8VH51-2	Isoform 2 of RNA-binding protein 39 OS=Mus musculus OX=10090 GN=Rbm39	45.281	41	14	21	14	1	524	58.6	10.13	41.53	14
High	A0A140T8T4	60S ribosomal protein L9 OS=Mus musculus OX=10090 GN=Rpl9-ps6 PE=3 SV=1	45.131	61	10	18	10	1	192	21.8	9.88	50.89	10
High	O70569	Ribosomal protein S14 OS=Mus musculus OX=10090 GN=rps14 PE=3 SV=1	45.087	68	10	19	10	1	151	16.3	10.13	65.09	10
High	Q3UKJ7	WD40 repeat-containing protein SMU1 OS=Mus musculus OX=10090 GN=Smu1 PE=2 SV=2	45.039	36	15	17	15	1	513	57.5	7.18	32.85	15
High	Q8CGP2-2	Isoform 2 of Histone H2B type 1-P OS=Mus musculus OX=10090 GN=Hist1h2bp	44.958	61	10	22	2	1	138	15.6	10.24	60.74	10
High	Q3TW77	Uncharacterized protein OS=Mus musculus OX=10090 GN=Grn PE=2 SV=1	44.84	26	9	14	9	1	602	65	6.99	48.7	9
High	P97868	E3 ubiquitin-protein ligase RBBP6 OS=Mus musculus OX=10090 GN=Rbbp6 PE=1 SV=5	44.543	11	17	17	17	1	1790	199.5	9.63	26.07	17
High	H3BL37	Treacle protein OS=Mus musculus OX=10090 GN=Tcof1 PE=1 SV=1	44.522	18	16	17	11	1	1356	138.5	9.26	31.56	16
High	Q6ZQH0	MKIAA0187 protein (Fragment) OS=Mus musculus OX=10090 GN=Bms1 PE=2 SV=1	44.234	14	15	18	15	1	1287	145.6	6.27	27.73	15
High	Q9D554	Splicing factor 3A subunit 3 OS=Mus musculus OX=10090 GN=Sf3a3 PE=1 SV=2	44.059	32	16	18	16	1	501	58.8	5.34	40.93	16
High	A0A0A0MQA5	Tubulin alpha chain (Fragment) OS=Mus musculus OX=10090 GN=Tuba4a PE=1 SV=1	44.048	38	13	19	3	1	477	52.9	5.19	45.81	13
High	A0A2R8VHW4	Bromodomain-containing protein 4 (Fragment) OS=Mus musculus OX=10090 GN=Brd4 PE=1 SV=1	43.931	77	9	24	2	1	169	18.7	9.95	59.18	9
High	Q68FG3	Protein SPT2 homolog OS=Mus musculus OX=10090 GN=Spty2d1 PE=2 SV=1	43.848	34	18	23	18	1	682	74.8	9.76	40.03	18
High	Q8CGP0	Histone H2B type 3-B OS=Mus musculus OX=10090 GN=H2bu1 PE=1 SV=3	43.428	61	9	22	1	1	126	13.9	10.32	63.68	9
High	Q8VIJ6	Splicing factor, proline- and glutamine-rich OS=Mus musculus OX=10090 GN=Sfpq PE=1 SV=1	43.352	26	16	20	15	1	699	75.4	9.44	40.89	16
High	P62751	60S ribosomal protein L23a OS=Mus musculus OX=10090 GN=Rpl23a PE=1 SV=1	43.185	54	15	24	15	1	156	17.7	10.45	56.52	15
High	Q3UKP5	Uncharacterized protein OS=Mus musculus OX=10090 GN=Xab2 PE=2 SV=1	42.953	23	16	17	16	1	855	99.8	6.21	25.85	16
High	Q1W5W7	Integrase OS=Mus musculus OX=10090 GN=gag-pol PE=3 SV=1	42.877	16	15	19	10	1	1067	119.7	9.26	37.47	15
High	A0A1D5RL92	Calcium homeostasis endoplasmic reticulum protein OS=Mus musculus OX=10090 GN=Cherp PE=1 SV=1	42.865	19	15	19	15	1	938	106.3	9.19	37.83	15
High	Q5BKP5	RNA helicase OS=Mus musculus OX=10090 GN=Ddx50 PE=2 SV=1	42.685	29	15	16	15	1	734	82.1	9.17	37.21	15
High	Q3U561	Ribosomal protein OS=Mus musculus OX=10090 GN=Rpl10a PE=2 SV=1	42.68	48	12	26	12	1	217	24.8	9.94	61.91	12
High	Q3UEB3-2	Isoform 2 of Poly(U)-binding-splicing factor PUF60 OS=Mus musculus OX=10090 GN=Puf60	42.394	33	12	13	12	1	547	58.5	5.35	28.13	12
High	G5E924	Heterogeneous nuclear ribonucleoprotein L (Fragment) OS=Mus musculus OX=10090 GN=Hnrnpl PE=1 SV=1	42.324	31	13	16	13	1	615	66.9	8.18	45.47	13
High	Q6PE01	U5 small nuclear ribonucleoprotein 40 kDa protein OS=Mus musculus OX=10090 GN=Snrnp40 PE=1 SV=1	42.266	50	11	13	11	1	358	39.3	8.1	44.04	11
High	Q3URQ0	Testis-expressed protein 10 OS=Mus musculus OX=10090 GN=Tex10 PE=1 SV=1	42.212	20	16	18	16	1	928	105.1	9.16	35.93	16
High	A2AM97	Ribosomal protein 10 OS=Mus musculus OX=10090 GN=RP23-436K3.4-001 PE=4 SV=1	42.189	44	9	15	9	1	214	24.6	10.08	47.58	9
High	G3X8T2	Zinc finger CCCH domain-containing protein 18 OS=Mus musculus OX=10090 GN=Zc3h18 PE=1 SV=1	42.107	20	14	17	14	1	972	108.2	8	32.76	14
High	H7BX95	Serine/arginine-rich splicing factor 1 OS=Mus musculus OX=10090 GN=Srsf1 PE=1 SV=1	41.928	49	15	28	15	1	253	28.3	10.08	52.67	15
High	A2BE28	Ribosomal biogenesis protein LAS1L OS=Mus musculus OX=10090 GN=Las1l PE=1 SV=1	41.592	29	16	19	16	1	776	89.4	4.44	30.74	16
High	P50446	Keratin, type II cytoskeletal 6A OS=Mus musculus OX=10090 GN=Krt6a PE=1 SV=3	41.454	18	16	25	1	1	553	59.3	7.94	47.54	16
High	Q3UMU9-3	Isoform 3 of Hepatoma-derived growth factor-related protein 2 OS=Mus musculus OX=10090 GN=Hdgfl2	41.386	24	17	21	17	1	678	75.2	8.59	33.89	17
High	Q61164	Transcriptional repressor CTCF OS=Mus musculus OX=10090 GN=Ctcf PE=1 SV=2	41.228	22	14	18	14	1	736	83.7	6.9	32.62	14
High	Q08288	Cell growth-regulating nucleolar protein OS=Mus musculus OX=10090 GN=Lyar PE=1 SV=2	41.162	39	13	17	13	1	388	43.7	9.5	31.98	13
High	P62137	Serine/threonine-protein phosphatase PP1-alpha catalytic subunit OS=Mus musculus OX=10090 GN=Ppp1ca PE=1 SV=1	41.134	49	13	17	4	1	330	37.5	6.33	36.21	13
High	Q9WV02	RNA-binding motif protein, X chromosome OS=Mus musculus OX=10090 GN=Rbmx PE=1 SV=1	40.892	41	16	22	3	1	391	42.3	10.05	38.96	16
High	Q6NZQ2	Probable ATP-dependent RNA helicase DDX31 OS=Mus musculus OX=10090 GN=Ddx31 PE=2 SV=2	40.891	26	14	15	14	1	687	76.9	9.74	31.05	14
High	Q8C2Q3	RNA-binding protein 14 OS=Mus musculus OX=10090 GN=Rbm14 PE=1 SV=1	40.408	24	14	18	14	1	669	69.4	9.67	31.48	14
High	Q3UZG3	Uncharacterized protein OS=Mus musculus OX=10090 GN=Hnrnpa3 PE=2 SV=1	40.328	39	13	15	2	1	379	39.7	9.1	24.64	13
High	E9QMP6	Non-specific serine/threonine protein kinase OS=Mus musculus OX=10090 GN=Mark2 PE=1 SV=2	40.316	20	12	12	12	1	776	86.3	9.67	31.5	12
High	A0A0B4J1E2	SNW domain-containing protein 1 OS=Mus musculus OX=10090 GN=Snw1 PE=1 SV=1	40.228	34	14	14	14	1	536	61.4	9.48	34.54	14
High	Q569Z5	Probable ATP-dependent RNA helicase DDX46 OS=Mus musculus OX=10090 GN=Ddx46 PE=1 SV=2	39.853	19	18	18	18	1	1032	117.4	9.26	26.23	18
High	Q9CXS4	Centromere protein V OS=Mus musculus OX=10090 GN=Cenpv PE=1 SV=2	39.785	63	12	15	12	1	252	27.5	9.79	35.3	12
High	Q3UG49	Uncharacterized protein (Fragment) OS=Mus musculus OX=10090 GN=Trp53bp1 PE=2 SV=1	39.745	41	11	14	1	1	545	58.3	4.31	36.76	11
High	P24788	Cyclin-dependent kinase 11B OS=Mus musculus OX=10090 GN=Cdk11b PE=1 SV=2	39.581	21	15	15	15	1	784	91.5	5.39	24.89	15
High	Q80Y82	Protein kinase C binding protein 1 OS=Mus musculus OX=10090 GN=Zmynd8 PE=2 SV=3	39.552	16	14	14	14	1	1255	139.1	7.12	23.95	14
High	Q8CFQ3	RNA helicase aquarius OS=Mus musculus OX=10090 GN=Aqr PE=1 SV=2	39.508	12	14	14	14	1	1481	170.2	6.27	28.05	14
High	P63154	Crooked neck-like protein 1 OS=Mus musculus OX=10090 GN=Crnkl1 PE=1 SV=1	39.474	23	15	16	15	1	690	83.4	6.93	19.36	15
High	Q5M9M4	40S ribosomal protein S15a OS=Mus musculus OX=10090 GN=Rps15a PE=1 SV=1	39.366	72	9	23	9	1	130	14.8	10.13	50.94	9
High	Q5DTP7	DNA helicase (Fragment) OS=Mus musculus OX=10090 GN=Chd4 PE=2 SV=1	39.293	10	15	15	15	1	1945	220.8	5.94	24.21	15
High	Q3UK83	Helix-destabilizing protein OS=Mus musculus OX=10090 GN=Hnrnpa1 PE=2 SV=1	39.146	37	11	16	9	1	373	38.8	9.13	39.33	11
High	Q91V55	40S ribosomal protein S5 OS=Mus musculus OX=10090 GN=Rps5 PE=1 SV=1	38.986	42	9	20	9	1	204	22.9	9.72	39.86	9
High	Q91YK2	Ribosomal RNA processing protein 1 homolog B OS=Mus musculus OX=10090 GN=Rrp1b PE=1 SV=2	38.975	27	15	17	15	1	724	80.5	9.72	25.73	15
High	Q5I0T8	Ribosomal protein L19 OS=Mus musculus OX=10090 GN=Rpl19 PE=1 SV=1	38.949	38	11	30	11	1	196	23.5	11.47	56.44	11
High	P63087-2	Isoform 2 of Serine/threonine-protein phosphatase PP1-gamma catalytic subunit OS=Mus musculus OX=10090 GN=Ppp1cc	38.795	49	13	18	3	1	337	38.5	6.13	37.9	13
High	Q8C2Q7	Heterogeneous nuclear ribonucleoprotein H OS=Mus musculus OX=10090 GN=Hnrnph1 PE=1 SV=1	38.343	31	10	16	5	1	472	51.2	6.8	38.22	10
High	Q04750	DNA topoisomerase 1 OS=Mus musculus OX=10090 GN=Top1 PE=1 SV=2	38.25	23	17	18	17	1	767	90.8	9.33	24.54	17
High	Q61781	Keratin, type I cytoskeletal 14 OS=Mus musculus OX=10090 GN=Krt14 PE=1 SV=2	38.216	29	11	25	1	1	484	52.8	5.17	40.45	11
High	Q8CH25	SAFB-like transcription modulator OS=Mus musculus OX=10090 GN=Sltm PE=1 SV=1	38.076	15	15	16	15	1	1031	116.9	7.72	28.74	15
High	E9Q317	18 kDa Sin3-associated polypeptide OS=Mus musculus OX=10090 GN=Sap18 PE=1 SV=1	37.847	69	13	16	13	1	172	19.6	9.8	40.16	13
High	E9QQ10	A-kinase anchor protein 9 OS=Mus musculus OX=10090 GN=Akap9 PE=1 SV=1	37.802	5	15	15	15	1	3779	433.9	5.03	16.32	15
High	Q99KG3	RNA-binding protein 10 OS=Mus musculus OX=10090 GN=Rbm10 PE=1 SV=1	37.512	17	13	13	13	1	930	103.4	5.92	27.83	13
High	Q64511	DNA topoisomerase 2-beta OS=Mus musculus OX=10090 GN=Top2b PE=1 SV=2	37.431	10	15	18	6	1	1612	181.8	8.29	21.21	15
High	Q4VBE8	WD repeat-containing protein 18 OS=Mus musculus OX=10090 GN=Wdr18 PE=1 SV=1	37.39	41	12	15	12	1	431	47.2	6.89	40.87	12
High	Q8BG05-2	Isoform 2 of Heterogeneous nuclear ribonucleoprotein A3 OS=Mus musculus OX=10090 GN=Hnrnpa3	37.259	36	12	14	1	1	357	37.1	8.31	22.37	12
High	Q8CFI7	DNA-directed RNA polymerase II subunit RPB2 OS=Mus musculus OX=10090 GN=Polr2b PE=1 SV=2	37.182	17	17	17	17	1	1174	133.8	6.87	16.96	17
High	Q8R1B4	Eukaryotic translation initiation factor 3 subunit C OS=Mus musculus OX=10090 GN=Eif3c PE=1 SV=1	37.043	18	14	14	14	1	911	105.5	5.78	28.2	14
High	Q5M9J8	60S ribosomal protein L28 OS=Mus musculus OX=10090 GN=Rpl28 PE=1 SV=1	36.851	50	13	17	13	1	137	15.7	12.02	32.65	13
High	P62717	60S ribosomal protein L18a OS=Mus musculus OX=10090 GN=Rpl18a PE=1 SV=1	36.723	61	13	23	13	1	176	20.7	10.71	43.96	13
High	E9PZJ8	Activating signal cointegrator 1 complex subunit 3 OS=Mus musculus OX=10090 GN=Ascc3 PE=1 SV=1	36.047	7	13	14	13	1	2198	250.4	7.02	19.23	13
High	Q5M9P3	40S ribosomal protein S19 (Fragment) OS=Mus musculus OX=10090 GN=Rps19 PE=2 SV=1	35.784	51	12	16	12	1	151	16.7	10.52	28.08	12
High	Q99M28	RNA-binding protein with serine-rich domain 1 OS=Mus musculus OX=10090 GN=Rnps1 PE=1 SV=1	35.694	28	7	21	7	1	305	34.2	11.84	55.18	7
High	P10922	Histone H1.0 OS=Mus musculus OX=10090 GN=H1-0 PE=2 SV=4	35.633	34	8	20	8	1	194	20.8	10.9	52.06	8
High	P57784	U2 small nuclear ribonucleoprotein A' OS=Mus musculus OX=10090 GN=Snrpa1 PE=1 SV=2	35.173	52	11	15	11	1	255	28.3	8.62	34.54	11
High	Q4G5Y4	Endothelial differentiation inhibitory protein D18 OS=Mus musculus OX=10090 GN=Brd3 PE=2 SV=1	35.157	14	10	23	3	1	726	79.7	9.39	36.81	10
High	Q80ZM5	H1 histone family, member X OS=Mus musculus OX=10090 GN=H1f10 PE=1 SV=1	35.004	41	10	19	10	1	188	20.1	11.22	37.64	10
High	Q8BGZ7	Keratin, type II cytoskeletal 75 OS=Mus musculus OX=10090 GN=Krt75 PE=1 SV=1	34.717	16	14	22	1	1	551	59.7	8.31	45.17	14
High	Q9R0L6-2	Isoform 2 of Pericentriolar material 1 protein OS=Mus musculus OX=10090 GN=Pcm1	34.492	8	14	14	14	1	2064	232.7	4.97	23.55	14
High	Q9WVM1	Rac GTPase-activating protein 1 OS=Mus musculus OX=10090 GN=Racgap1 PE=1 SV=1	34.2	24	13	15	13	1	628	70.1	8.51	27.39	13
High	P62141	Serine/threonine-protein phosphatase PP1-beta catalytic subunit OS=Mus musculus OX=10090 GN=Ppp1cb PE=1 SV=3	34.17	42	11	14	3	1	327	37.2	6.19	25.58	11
High	A0MNP4	CDW13/WDR61 OS=Mus musculus OX=10090 GN=Wdr61 PE=1 SV=1	34.007	42	9	10	9	1	305	33.8	5.36	31.96	9
High	A0A0R4J036	160 kDa neurofilament protein OS=Mus musculus OX=10090 GN=Nefm PE=1 SV=1	33.971	18	11	12	10	1	848	95.9	4.78	18.51	11
High	Q8C1D8	Protein IWS1 homolog OS=Mus musculus OX=10090 GN=Iws1 PE=1 SV=1	33.787	17	13	13	13	1	766	85.2	4.67	27.7	13
High	C0HKD9	Microfibrillar-associated protein 1B OS=Mus musculus OX=10090 GN=Mfap1b PE=1 SV=1	33.708	26	11	12	11	1	439	51.9	4.98	26.09	11
High	P35980	60S ribosomal protein L18 OS=Mus musculus OX=10090 GN=Rpl18 PE=1 SV=3	33.573	47	10	20	10	1	188	21.6	11.78	45.99	10
High	A0A1Y7VKY1	40S ribosomal protein S18 OS=Mus musculus OX=10090 GN=Rps18-ps5 PE=3 SV=1	33.438	51	11	21	11	1	152	17.7	10.86	42.83	11
High	Q9D903	Probable rRNA-processing protein EBP2 OS=Mus musculus OX=10090 GN=Ebna1bp2 PE=2 SV=1	33.209	46	13	15	13	1	306	34.7	10.08	28.36	13
High	Q3UYX6	RRM domain-containing protein OS=Mus musculus OX=10090 GN=Srsf10 PE=2 SV=1	33.16	25	10	12	10	1	278	33.1	11.09	32.48	10
High	P62889	60S ribosomal protein L30 OS=Mus musculus OX=10090 GN=Rpl30 PE=1 SV=2	32.96	67	9	15	9	1	115	12.8	9.63	40.68	9
High	E9PZY8	Protein virilizer homolog OS=Mus musculus OX=10090 GN=Virma PE=1 SV=1	32.895	8	15	15	15	1	1861	207	5.02	18.99	15
High	Q4QY64	ATPase family AAA domain-containing protein 5 OS=Mus musculus OX=10090 GN=Atad5 PE=1 SV=1	32.597	9	13	13	13	1	1826	203.8	8.9	19.18	13
High	Q60973	Histone-binding protein RBBP7 OS=Mus musculus OX=10090 GN=Rbbp7 PE=1 SV=1	32.3	33	11	15	6	1	425	47.8	5.05	32.77	11
High	Q3U7D2	Ribosomal protein L15 OS=Mus musculus OX=10090 GN=Rpl15 PE=2 SV=1	32.114	44	10	14	10	1	204	24.1	11.62	34.04	10
High	Q7TNC4	Putative RNA-binding protein Luc7-like 2 OS=Mus musculus OX=10090 GN=Luc7l2 PE=1 SV=1	31.755	29	10	13	6	1	392	46.6	10.1	31.2	10
High	P14576	Signal recognition particle 54 kDa protein OS=Mus musculus OX=10090 GN=Srp54 PE=1 SV=2	31.345	26	12	12	12	1	504	55.7	8.75	19.65	12
High	Q4FZE6	40S ribosomal protein S7 OS=Mus musculus OX=10090 GN=Rps7 PE=2 SV=1	31.341	42	6	9	6	1	194	22.1	10.1	39.88	6
High	Q8R3C6	Probable RNA-binding protein 19 OS=Mus musculus OX=10090 GN=Rbm19 PE=1 SV=1	31.231	15	12	12	12	1	952	106	6.57	21.52	12
High	Q8QZY1	Eukaryotic translation initiation factor 3 subunit L OS=Mus musculus OX=10090 GN=Eif3l PE=1 SV=1	31.196	20	10	10	10	1	564	66.6	6.44	21.19	10
High	Q544R5	TAR DNA-binding protein 43 OS=Mus musculus OX=10090 GN=Tardbp PE=1 SV=1	31.102	38	11	12	11	1	414	44.5	6.7	24.74	11
High	Q99MR6	Serrate RNA effector molecule homolog OS=Mus musculus OX=10090 GN=Srrt PE=1 SV=1	31.003	13	12	15	12	1	875	100.4	5.97	27.08	12
High	P08551	Neurofilament light polypeptide OS=Mus musculus OX=10090 GN=Nefl PE=1 SV=5	31.001	24	13	13	12	1	543	61.5	4.64	20.29	13
High	Q3U8W9	Uncharacterized protein OS=Mus musculus OX=10090 GN=Hnrnpr PE=2 SV=1	30.905	18	11	12	11	1	632	70.8	8.13	16.79	11
High	Q9DBE9	pre-rRNA 2'-O-ribose RNA methyltransferase FTSJ3 OS=Mus musculus OX=10090 GN=Ftsj3 PE=1 SV=1	30.527	15	10	10	10	1	838	95.5	8.38	21.15	10
High	Q99KC3	Nop2 protein OS=Mus musculus OX=10090 GN=Nop2 PE=2 SV=1	30.28	32	9	14	2	1	432	46.8	9.99	29.35	9
High	Q8R080	G2 and S phase-expressed protein 1 OS=Mus musculus OX=10090 GN=Gtse1 PE=1 SV=2	30.116	18	11	12	11	1	741	78.7	9.39	23.62	11
High	Q3TJM9	Uncharacterized protein OS=Mus musculus OX=10090 GN=Abce1 PE=2 SV=1	29.848	21	11	11	11	1	599	67.2	8.34	15.26	11
High	Q61033	Lamina-associated polypeptide 2, isoforms alpha/zeta OS=Mus musculus OX=10090 GN=Tmpo PE=1 SV=4	29.622	22	11	11	11	1	693	75.1	8.05	18.03	11
High	P10126	Elongation factor 1-alpha 1 OS=Mus musculus OX=10090 GN=Eef1a1 PE=1 SV=3	29.581	34	10	11	10	1	462	50.1	9.01	29.01	10
High	F8VQC1	Signal recognition particle subunit SRP72 OS=Mus musculus OX=10090 GN=Srp72 PE=1 SV=1	29.38	18	10	10	10	1	671	74.6	9.23	20.58	10
High	Q60972	Histone-binding protein RBBP4 OS=Mus musculus OX=10090 GN=Rbbp4 PE=1 SV=5	29.148	39	10	12	5	1	425	47.6	4.89	28.29	10
High	D3Z4J3	Unconventional myosin-Va OS=Mus musculus OX=10090 GN=Myo5a PE=1 SV=1	29.029	8	13	14	13	1	1855	215.4	8.5	12.93	13
High	E9QP00	Transformer-2 protein homolog alpha OS=Mus musculus OX=10090 GN=Tra2a PE=1 SV=1	28.849	42	10	13	9	1	282	32.6	11.27	23.53	10
High	Q3TF40	Uncharacterized protein (Fragment) OS=Mus musculus OX=10090 GN=Nono PE=2 SV=1	28.833	25	12	15	11	1	528	60.4	9.61	23.73	12
High	Q8BGC0	HIV Tat-specific factor 1 homolog OS=Mus musculus OX=10090 GN=Htatsf1 PE=1 SV=1	28.826	22	14	14	14	1	757	86.2	4.4	19.76	14
High	Q9CQR2	40S ribosomal protein S21 OS=Mus musculus OX=10090 GN=Rps21 PE=1 SV=1	28.708	59	5	9	5	1	83	9.1	8.51	24.64	5
High	Q921F4	Heterogeneous nuclear ribonucleoprotein L-like OS=Mus musculus OX=10090 GN=Hnrnpll PE=1 SV=3	28.692	22	9	10	9	1	591	64.1	5.85	18.3	9
High	P62830	60S ribosomal protein L23 OS=Mus musculus OX=10090 GN=Rpl23 PE=1 SV=1	28.619	59	7	25	7	1	140	14.9	10.51	48.63	7
High	Q5CZY9	Rps16 protein OS=Mus musculus OX=10090 GN=Rps16 PE=2 SV=1	28.602	46	9	21	9	1	172	19.3	10.2	38.82	9
High	Q9WV70	Nucleolar complex protein 2 homolog OS=Mus musculus OX=10090 GN=Noc2l PE=1 SV=2	28.597	16	11	11	11	1	747	85.4	5.97	24.22	11
High	E9Q5K9	YTH domain-containing protein 1 OS=Mus musculus OX=10090 GN=Ythdc1 PE=1 SV=2	28.429	21	13	14	13	1	736	85.6	6.16	23.14	13
High	Q9QWL7	Keratin, type I cytoskeletal 17 OS=Mus musculus OX=10090 GN=Krt17 PE=1 SV=3	28.397	23	11	18	1	1	433	48.1	5.06	32.35	11
High	Q5SVQ0	Histone acetyltransferase KAT7 OS=Mus musculus OX=10090 GN=Kat7 PE=1 SV=1	28.373	22	10	10	10	1	613	70.6	8.72	21.01	10
High	Q9DC48	Pre-mRNA-processing factor 17 OS=Mus musculus OX=10090 GN=Cdc40 PE=2 SV=1	28.336	21	11	11	11	1	579	65.4	7.06	14.61	11
High	Q61666	Protein HIRA OS=Mus musculus OX=10090 GN=Hira PE=1 SV=3	27.849	14	10	11	10	1	1015	111.7	8.06	16.1	10
High	P62996	Transformer-2 protein homolog beta OS=Mus musculus OX=10090 GN=Tra2b PE=1 SV=1	27.689	36	9	13	8	1	288	33.6	11.25	31.45	9
High	Q3TIQ2	60S ribosomal protein L12 OS=Mus musculus OX=10090 GN=Rpl12 PE=2 SV=1	27.595	55	6	15	6	1	165	17.8	9.42	49.15	6
High	Q9EP97	Sentrin-specific protease 3 OS=Mus musculus OX=10090 GN=Senp3 PE=1 SV=1	27.504	21	11	12	11	1	568	64.4	8.75	24.73	11
High	Q8BL97	Serine/arginine-rich splicing factor 7 OS=Mus musculus OX=10090 GN=Srsf7 PE=1 SV=1	27.454	30	10	14	9	1	267	30.8	11.9	27.82	10
High	Q6IFX2	Keratin, type I cytoskeletal 42 OS=Mus musculus OX=10090 GN=Krt42 PE=1 SV=1	27.248	24	11	17	3	1	452	50.1	5.16	31.51	11
High	P51881	ADP/ATP translocase 2 OS=Mus musculus OX=10090 GN=Slc25a5 PE=1 SV=3	27.216	37	10	12	5	1	298	32.9	9.73	22.77	10
High	Q5RJV5	Polypyrimidine tract-binding protein 1 OS=Mus musculus OX=10090 GN=Ptbp1 PE=2 SV=1	26.71	21	9	10	6	1	555	59.2	9.25	20.32	9
High	Q9D2D7	Zinc finger protein 687 OS=Mus musculus OX=10090 GN=Znf687 PE=1 SV=1	26.561	11	11	13	11	1	1237	130.3	8.12	18.37	11
High	Q8QZY9	Splicing factor 3B subunit 4 OS=Mus musculus OX=10090 GN=Sf3b4 PE=1 SV=1	26.545	26	7	8	7	1	424	44.3	8.56	28.61	7
High	Q922U1	U4/U6 small nuclear ribonucleoprotein Prp3 OS=Mus musculus OX=10090 GN=Prpf3 PE=1 SV=1	26.462	22	12	13	12	1	683	77.4	9.5	22.77	12
High	P84104	Serine/arginine-rich splicing factor 3 OS=Mus musculus OX=10090 GN=Srsf3 PE=1 SV=1	26.445	32	7	13	6	1	164	19.3	11.65	27.65	7
High	Q60749	KH domain-containing, RNA-binding, signal transduction-associated protein 1 OS=Mus musculus OX=10090 GN=Khdrbs1 PE=1 SV=2	26.431	25	8	9	7	1	443	48.3	8.72	24.03	8
High	P70333	Heterogeneous nuclear ribonucleoprotein H2 OS=Mus musculus OX=10090 GN=Hnrnph2 PE=1 SV=1	26.341	21	7	12	3	1	449	49.2	6.3	27.94	7
High	Q3UW40	TRASH domain-containing protein OS=Mus musculus OX=10090 GN=Rpl24 PE=2 SV=1	26.305	36	9	16	9	1	160	18.2	11.05	32.64	9
High	Q9CZU3	Exosome RNA helicase MTR4 OS=Mus musculus OX=10090 GN=Mtrex PE=1 SV=1	26.273	12	9	9	9	1	1040	117.6	6.4	17.49	9
High	Q9CR57	60S ribosomal protein L14 OS=Mus musculus OX=10090 GN=Rpl14 PE=1 SV=3	26.271	34	8	11	8	1	217	23.5	11.02	27.82	8
High	Q3THW7	Eukaryotic translation initiation factor 3 subunit H OS=Mus musculus OX=10090 GN=Eif3h PE=2 SV=1	26.196	40	10	11	10	1	352	39.8	6.54	18.96	10
High	Q8CH18	Cell division cycle and apoptosis regulator protein 1 OS=Mus musculus OX=10090 GN=Ccar1 PE=1 SV=1	26.187	12	11	13	11	1	1146	132	5.76	14.43	11
High	Q9ERU9	E3 SUMO-protein ligase RanBP2 OS=Mus musculus OX=10090 GN=Ranbp2 PE=1 SV=2	26.178	4	11	11	11	1	3053	340.9	6.18	19.72	11
High	P08113	Endoplasmin OS=Mus musculus OX=10090 GN=Hsp90b1 PE=1 SV=2	26.166	15	11	11	10	1	802	92.4	4.82	13.89	11
High	P62983	Ubiquitin-40S ribosomal protein S27a OS=Mus musculus OX=10090 GN=Rps27a PE=1 SV=2	26.076	49	7	11	4	1	156	17.9	9.64	28.66	7
High	P62843	40S ribosomal protein S15 OS=Mus musculus OX=10090 GN=Rps15 PE=1 SV=2	25.913	41	4	14	4	1	145	17	10.39	42.82	4
High	Q9EQD6	Keratin intermediate filament 16a OS=Mus musculus OX=10090 GN=K16 PE=3 SV=1	25.823	15	6	20	3	1	474	52	5.2	27.5	6
High	Q3UTJ2-2	Isoform 2 of Sorbin and SH3 domain-containing protein 2 OS=Mus musculus OX=10090 GN=Sorbs2	25.786	13	12	13	12	1	1295	144.9	8.27	13.85	12
High	Q9DCA5	Ribosome biogenesis protein BRX1 homolog OS=Mus musculus OX=10090 GN=Brix1 PE=1 SV=3	25.742	29	7	8	7	1	353	41.2	10.02	12.23	7
High	Q9D8S5	Serine/arginine-rich-splicing factor 5 OS=Mus musculus OX=10090 GN=Srsf5 PE=1 SV=1	25.737	30	9	14	8	1	270	31	11.56	37.44	9
High	Q3UFZ4	Nucleolar protein 10 OS=Mus musculus OX=10090 GN=Nol10 PE=2 SV=1	25.626	15	10	12	10	1	687	80	8.29	22.73	10
High	A2AQ19	RNA polymerase-associated protein RTF1 homolog OS=Mus musculus OX=10090 GN=Rtf1 PE=1 SV=1	25.485	16	11	12	11	1	715	80.7	8.16	12.69	11
High	Q9CY57	Chromatin target of PRMT1 protein OS=Mus musculus OX=10090 GN=Chtop PE=1 SV=2	25.43	24	5	10	5	1	249	26.6	12.23	25.72	5
High	G3UVU2	Splicing factor 3A subunit 2 OS=Mus musculus OX=10090 GN=Sf3a2 PE=1 SV=1	25.424	20	8	10	8	1	485	51.2	9.64	20.42	8
High	Q8C2T9	Uncharacterized protein OS=Mus musculus OX=10090 GN=Ik PE=2 SV=1	25.225	20	11	11	11	1	557	65.5	6.64	9.69	11
High	A0A286YDV7	Nucleolar and coiled-body phosphoprotein 1 (Fragment) OS=Mus musculus OX=10090 GN=Nolc1 PE=1 SV=1	25.172	17	11	12	11	1	702	73.6	9.36	17.72	11
High	F8WHL2	Coatomer subunit alpha OS=Mus musculus OX=10090 GN=Copa PE=1 SV=1	25.149	11	10	11	10	1	1233	139.3	7.58	17.08	10
High	Q52KI8	Serine/arginine repetitive matrix protein 1 OS=Mus musculus OX=10090 GN=Srrm1 PE=1 SV=2	25.014	12	8	11	8	1	946	106.8	11.87	24.65	8
High	Q8BLH7	HIRA-interacting protein 3 OS=Mus musculus OX=10090 GN=Hirip3 PE=1 SV=1	24.949	16	8	10	8	1	601	65.2	7.84	18.87	8
High	P61358	60S ribosomal protein L27 OS=Mus musculus OX=10090 GN=Rpl27 PE=1 SV=2	24.745	43	5	13	5	1	136	15.8	10.56	30.76	5
High	Q8JZX4	Splicing factor 45 OS=Mus musculus OX=10090 GN=Rbm17 PE=1 SV=1	24.713	24	9	10	9	1	405	45.3	5.82	19.31	9
High	E9QAP7	TATA-box-binding protein-associated factor 4 OS=Mus musculus OX=10090 GN=Taf4 PE=1 SV=1	24.698	12	8	13	8	1	1042	105.2	9.86	15.31	8
High	P14115	60S ribosomal protein L27a OS=Mus musculus OX=10090 GN=Rpl27a PE=1 SV=5	24.621	32	6	8	6	1	148	16.6	11.12	24.18	6
High	P70410	Nucleolar GTP-binding protein 2 (Fragment) OS=Mus musculus OX=10090 GN=Gnl2 PE=2 SV=1	24.577	14	10	11	10	1	728	83	9.23	15.02	10
High	A0A068BFS0	WD repeat domain 46 OS=Mus musculus OX=10090 GN=Wdr46 PE=2 SV=1	24.487	20	8	8	8	1	622	69	9.82	15.21	8
High	P63325	40S ribosomal protein S10 OS=Mus musculus OX=10090 GN=Rps10 PE=1 SV=1	24.208	49	8	23	8	1	165	18.9	10.15	49.39	8
High	Q62311	Transcription initiation factor TFIID subunit 6 OS=Mus musculus OX=10090 GN=Taf6 PE=1 SV=1	24.18	14	8	9	8	1	678	72.6	8.6	14.87	8
High	H7BX94	Lysine-rich nucleolar protein 1 OS=Mus musculus OX=10090 GN=Knop1 PE=1 SV=2	24.158	23	11	11	11	1	532	59.6	9.98	17	11
High	Q8C671	Serine/arginine-rich splicing factor 2 OS=Mus musculus OX=10090 GN=Srsf2 PE=2 SV=1	24.136	20	6	10	6	1	254	29	11.22	23.96	6
High	Q3UIG0	Eukaryotic translation initiation factor 3 subunit E OS=Mus musculus OX=10090 GN=Eif3e PE=1 SV=1	24.113	21	8	8	8	1	445	52.2	6.04	15.19	8
High	P97329	Kinesin-like protein KIF20A OS=Mus musculus OX=10090 GN=Kif20a PE=1 SV=1	24.071	10	8	8	8	1	887	99.8	6.99	13.66	8
High	Q4VAG4	Ribosomal protein L22 OS=Mus musculus OX=10090 GN=Rpl22 PE=1 SV=1	24.03	52	5	7	5	1	128	14.8	9.19	28.8	5
High	Q4FZH2	Ribosomal protein L26 OS=Mus musculus OX=10090 GN=Rpl26 PE=1 SV=1	23.942	48	9	15	9	1	145	17.2	10.55	32.33	9
High	O70194	Eukaryotic translation initiation factor 3 subunit D OS=Mus musculus OX=10090 GN=Eif3d PE=1 SV=2	23.896	19	8	8	8	1	548	63.9	6.05	15.79	8
High	O88532	Zinc finger RNA-binding protein OS=Mus musculus OX=10090 GN=Zfr PE=1 SV=2	23.79	12	9	10	9	1	1074	116.8	9.04	11.11	9
High	Q91Z49	UAP56-interacting factor OS=Mus musculus OX=10090 GN=Fyttd1 PE=1 SV=1	23.787	29	9	11	9	1	317	35.9	11.84	10.45	9
High	G5E870	E3 ubiquitin-protein ligase TRIP12 OS=Mus musculus OX=10090 GN=Trip12 PE=1 SV=1	23.722	6	10	11	10	1	2025	224	8.35	9.52	10
High	Q3URN5	Uncharacterized protein OS=Mus musculus OX=10090 GN=Aatf PE=2 SV=1	23.641	18	7	7	7	1	526	59.4	4.94	14.34	7
High	A0A2R8VK76	Cleavage and polyadenylation-specificity factor subunit 1 OS=Mus musculus OX=10090 GN=Cpsf1 PE=1 SV=1	23.577	8	9	10	9	1	1450	161.7	6.58	21.6	9
High	I3PQW3	La ribonucleoprotein domain family member 7 OS=Mus musculus OX=10090 GN=Larp7 PE=3 SV=1	23.451	18	8	9	8	1	570	64.8	9.47	15.51	8
High	P62911	60S ribosomal protein L32 OS=Mus musculus OX=10090 GN=Rpl32 PE=1 SV=2	23.404	41	7	16	7	1	135	15.9	11.33	28.48	7
High	B2RWT5	Peptidyl-prolyl isomerase G (Cyclophilin G) OS=Mus musculus OX=10090 GN=Ppig PE=2 SV=1	23.359	13	8	8	8	1	752	88.2	10.26	16.32	8
High	Q3UI84	Replication factor C subunit 4 OS=Mus musculus OX=10090 GN=Rfc4 PE=1 SV=1	23.233	24	7	7	7	1	370	40.9	8.53	16.63	7
High	P63163	Small nuclear ribonucleoprotein-associated protein N OS=Mus musculus OX=10090 GN=Snrpn PE=1 SV=1	23.158	22	7	16	7	1	240	24.6	11.19	41.65	7
High	Q3TZP3	Uncharacterized protein OS=Mus musculus OX=10090 GN=Mta2 PE=2 SV=1	23.064	15	9	10	7	1	668	75	9.72	16.19	9
High	Q61990	Poly(rC)-binding protein 2 OS=Mus musculus OX=10090 GN=Pcbp2 PE=1 SV=1	23.034	28	8	9	4	1	362	38.2	6.79	17.99	8
High	E0CYH0	Female-lethal(2)D homolog OS=Mus musculus OX=10090 GN=Wtap PE=1 SV=1	22.925	22	7	7	7	1	396	44.2	5.25	19.41	7
High	B2RTE3	Pre-mRNA-splicing factor 38A OS=Mus musculus OX=10090 GN=Prpf38a PE=2 SV=1	22.922	24	8	9	8	1	312	37.4	10.01	20.7	8
High	G3X9B1	HEAT repeat-containing protein 1 OS=Mus musculus OX=10090 GN=Heatr1 PE=1 SV=1	22.878	6	11	11	11	1	2143	241.9	6.98	9.91	11
High	Q149H7	Centromere protein U OS=Mus musculus OX=10090 GN=Cenpu PE=2 SV=1	22.557	20	8	8	8	1	410	46.3	9.69	11.47	8
High	Q9JJ80	Ribosome production factor 2 homolog OS=Mus musculus OX=10090 GN=Rpf2 PE=2 SV=2	22.515	30	7	7	7	1	306	35.3	10.04	19.1	7
High	Q6R891	Neurabin-2 OS=Mus musculus OX=10090 GN=Ppp1r9b PE=1 SV=1	22.491	10	6	7	6	1	817	89.5	4.92	10.87	6
High	Q3UV17	Keratin, type II cytoskeletal 2 oral OS=Mus musculus OX=10090 GN=Krt76 PE=1 SV=1	22.464	9	9	14	2	1	594	62.8	8.43	26.86	9
High	Q3T9Y8	Eukaryotic translation initiation factor 3 subunit I OS=Mus musculus OX=10090 GN=Eif3i PE=2 SV=1	22.457	30	8	9	8	1	325	36.4	5.77	16.33	8
High	Q9Z2X1	Heterogeneous nuclear ribonucleoprotein F OS=Mus musculus OX=10090 GN=Hnrnpf PE=1 SV=3	22.302	24	7	8	6	1	415	45.7	5.49	23.87	7
High	Q9CQK2	40S ribosomal protein S24 OS=Mus musculus OX=10090 GN=Rps24 PE=2 SV=1	22.295	35	5	8	5	1	134	15.5	10.8	21.46	5
High	Q8BHS3	Pre-mRNA-splicing factor RBM22 OS=Mus musculus OX=10090 GN=Rbm22 PE=1 SV=1	22.289	25	8	9	8	1	420	46.9	8.54	14.19	8
High	O08583	THO complex subunit 4 OS=Mus musculus OX=10090 GN=Alyref PE=1 SV=3	22.235	42	7	9	7	1	255	26.9	11.15	18.5	7
High	Q9D1R9	60S ribosomal protein L34 OS=Mus musculus OX=10090 GN=Rpl34 PE=1 SV=2	22.207	39	9	13	9	1	117	13.3	11.47	14.24	9
High	Q3TK27	Guanine nucleotide-binding protein-like 3 OS=Mus musculus OX=10090 GN=Gnl3 PE=2 SV=1	22.184	20	8	8	8	1	538	60.7	9.14	15.74	8
High	Q5BLJ7	40S ribosomal protein S13 OS=Mus musculus OX=10090 GN=Rps13 PE=1 SV=1	22.137	44	9	15	9	1	151	17.2	10.54	31.17	9
High	P62315	Small nuclear ribonucleoprotein Sm D1 OS=Mus musculus OX=10090 GN=Snrpd1 PE=1 SV=1	22.111	55	5	9	5	1	119	13.3	11.56	19.51	5
High	Q5SUF2-2	Isoform 2 of Luc7-like protein 3 OS=Mus musculus OX=10090 GN=Luc7l3	22.038	17	7	8	7	1	491	58.4	9.95	13.41	7
High	Q8C5N3	Pre-mRNA-splicing factor CWC22 homolog OS=Mus musculus OX=10090 GN=Cwc22 PE=1 SV=1	22.023	10	10	10	10	1	908	104.7	8.09	15.01	10
High	P61327	Protein mago nashi homolog OS=Mus musculus OX=10090 GN=Magoh PE=2 SV=1	21.899	48	8	9	8	1	146	17.2	6.11	19.99	8
High	Q6ZWN5	40S ribosomal protein S9 OS=Mus musculus OX=10090 GN=Rps9 PE=1 SV=3	21.716	47	11	19	11	1	194	22.6	10.65	42.8	11
High	O55135	Eukaryotic translation initiation factor 6 OS=Mus musculus OX=10090 GN=Eif6 PE=1 SV=2	21.675	47	6	7	6	1	245	26.5	4.74	24.54	6
High	Q5SQ20	Pescadillo homolog OS=Mus musculus OX=10090 GN=Pes1 PE=1 SV=1	21.655	16	9	9	9	1	588	68.2	6.84	12.59	9
High	Q5U4C3	Splicing factor, arginine/serine-rich 19 OS=Mus musculus OX=10090 GN=Scaf1 PE=1 SV=1	21.646	8	9	9	9	1	1256	133.8	9.45	13.92	9
High	Q3V455	Nicotinamide-nucleotide adenylyltransferase OS=Mus musculus OX=10090 PE=2 SV=1	21.596	35	7	9	7	1	285	32.3	9	10.91	7
High	Q8R0K4	Coiled-coil domain-containing protein 137 OS=Mus musculus OX=10090 GN=Ccdc137 PE=2 SV=1	21.547	33	9	12	9	1	290	32.9	10.68	19.44	9
High	Q9DBR1	5'-3' exoribonuclease 2 OS=Mus musculus OX=10090 GN=Xrn2 PE=1 SV=1	21.497	11	9	9	9	1	951	108.6	7.59	11.01	9
High	Q3TXM9	Uncharacterized protein OS=Mus musculus OX=10090 GN=Srsf9 PE=2 SV=1	21.343	40	9	10	9	1	222	25.7	8.65	18.83	9
High	A0A1W2P7A1	40S ribosomal protein S12 OS=Mus musculus OX=10090 GN=Rps12 PE=1 SV=1	21.175	48	7	9	7	1	148	16	8.16	17.41	7
High	B9EKU4	URB2 ribosome biogenesis 2 homolog (S. cerevisiae) OS=Mus musculus OX=10090 GN=Urb2 PE=2 SV=1	21.09	5	7	7	7	1	1524	171.6	7.34	10.67	7
High	Q9R226	KH domain-containing, RNA-binding, signal transduction-associated protein 3 OS=Mus musculus OX=10090 GN=Khdrbs3 PE=1 SV=1	21.073	21	6	8	5	1	346	38.8	8.1	13.61	6
High	Q059T9	PRP4 pre-mRNA processing factor 4 homolog (Yeast) OS=Mus musculus OX=10090 GN=Prpf4 PE=1 SV=1	21.032	22	9	9	9	1	521	58.3	7.28	12.4	9
High	Q7TNV0	Protein DEK OS=Mus musculus OX=10090 GN=Dek PE=1 SV=1	20.859	20	7	10	7	1	380	43.1	6.86	21.03	7
High	Q8C854	Myelin expression factor 2 OS=Mus musculus OX=10090 GN=Myef2 PE=1 SV=1	20.825	14	7	8	7	1	591	63.3	8.87	15.4	7
High	Q8C5L7	RNA-binding protein 34 OS=Mus musculus OX=10090 GN=Rbm34 PE=1 SV=2	20.757	20	8	9	8	1	442	49.1	10.01	13.56	8
High	Q8BH44	Coronin-2B OS=Mus musculus OX=10090 GN=Coro2b PE=1 SV=2	20.485	19	9	9	9	1	480	54.9	8.27	11.61	9
High	A2AG58	BCLAF1 and THRAP3 family member 3 OS=Mus musculus OX=10090 GN=Bclaf3 PE=1 SV=1	20.425	16	10	11	10	1	752	90.1	9.58	11.12	10
High	Q3TKD1	AAA domain-containing protein OS=Mus musculus OX=10090 GN=Rfc3 PE=1 SV=1	20.385	30	8	9	8	1	356	40.5	8.38	15.39	8
High	A2A6A1	G patch domain-containing protein 8 OS=Mus musculus OX=10090 GN=Gpatch8 PE=1 SV=1	20.341	7	8	9	8	1	1505	164.9	7.64	17.36	8
High	P62320	Small nuclear ribonucleoprotein Sm D3 OS=Mus musculus OX=10090 GN=Snrpd3 PE=1 SV=1	20.326	48	4	7	4	1	126	13.9	10.32	27.27	4
High	Q6ZPV2	Chromatin-remodeling ATPase INO80 OS=Mus musculus OX=10090 GN=Ino80 PE=1 SV=2	20.323	6	8	8	8	1	1559	176.4	9.36	14.12	8
High	A0A1S6GWH2	RNA helicase OS=Mus musculus OX=10090 GN=Ddx39b PE=2 SV=1	20.318	21	8	8	2	1	483	54.6	5.67	11.75	8
High	Q3U343	C2H2-type domain-containing protein OS=Mus musculus OX=10090 GN=Zfp622 PE=2 SV=1	20.247	18	6	6	6	1	476	53.4	6.21	17.37	6
High	Q5M9L1	60S ribosomal protein L36 OS=Mus musculus OX=10090 GN=Rpl36 PE=2 SV=1	20.209	31	6	10	6	1	105	12.3	11.59	19.06	6
High	F6YUI5	H/ACA ribonucleoprotein complex subunit DKC1 (Fragment) OS=Mus musculus OX=10090 GN=Dkc1 PE=1 SV=1	20.044	44	6	7	1	1	184	20.8	8.62	15.96	6
High	P60335	Poly(rC)-binding protein 1 OS=Mus musculus OX=10090 GN=Pcbp1 PE=1 SV=1	20.034	28	7	8	3	1	356	37.5	7.09	18.23	7
High	Q8R3N1	Nucleolar protein 14 OS=Mus musculus OX=10090 GN=Nop14 PE=1 SV=2	20.006	12	9	10	9	1	860	98.7	7.59	8.04	9
High	P68433	Histone H3.1 OS=Mus musculus OX=10090 GN=H3c1 PE=1 SV=2	19.965	46	6	9	1	1	136	15.4	11.12	21.83	6
High	Q8BP60	Uncharacterized protein OS=Mus musculus OX=10090 GN=Nxf1 PE=2 SV=1	19.938	18	9	9	9	1	618	70.3	8.72	10.58	9
High	P60843	Eukaryotic initiation factor 4A-I OS=Mus musculus OX=10090 GN=Eif4a1 PE=1 SV=1	19.888	18	8	8	5	1	406	46.1	5.48	12.19	8
High	Q9CPT5	Nucleolar protein 16 OS=Mus musculus OX=10090 GN=Nop16 PE=1 SV=1	19.876	48	9	9	9	1	178	21.1	9.91	9.63	9
High	Q6PGH1	Protein BUD31 homolog OS=Mus musculus OX=10090 GN=Bud31 PE=1 SV=2	19.746	47	6	6	6	1	144	17	8.82	16.3	6
High	Q9D0K3	AAA domain-containing protein OS=Mus musculus OX=10090 GN=Rfc2 PE=2 SV=1	19.682	26	7	7	7	1	349	38.8	6.86	12.43	7
High	Q80U76	Ribosome biogenesis regulatory protein (Fragment) OS=Mus musculus OX=10090 GN=Rrs1 PE=2 SV=2	19.613	21	7	7	7	1	373	42.3	10.87	17.03	7
High	O09167	60S ribosomal protein L21 OS=Mus musculus OX=10090 GN=Rpl21 PE=1 SV=3	19.545	33	4	8	4	1	160	18.6	10.49	22.56	4
High	Q7TSY8	Shugoshin 2 OS=Mus musculus OX=10090 GN=Sgo2 PE=1 SV=1	19.527	9	8	8	8	1	1164	130.2	8.76	8.73	8
High	Q6ZWV7	60S ribosomal protein L35 OS=Mus musculus OX=10090 GN=Rpl35 PE=1 SV=1	19.455	31	6	8	6	1	123	14.5	11.05	14.54	6
High	Q9D824	Pre-mRNA 3'-end-processing factor FIP1 OS=Mus musculus OX=10090 GN=Fip1l1 PE=1 SV=1	19.385	17	7	7	7	1	581	64.9	5.77	13.48	7
High	Q5XJE5	RNA polymerase-associated protein LEO1 OS=Mus musculus OX=10090 GN=Leo1 PE=1 SV=2	19.334	15	7	9	7	1	667	75.6	4.46	20.6	7
High	P62317	Small nuclear ribonucleoprotein Sm D2 OS=Mus musculus OX=10090 GN=Snrpd2 PE=1 SV=1	19.274	49	5	10	5	1	118	13.5	9.91	29.63	5
High	Q6ZWU9	40S ribosomal protein S27 OS=Mus musculus OX=10090 GN=Rps27 PE=1 SV=3	19.253	42	6	9	3	1	84	9.5	9.45	14.88	6
High	P26369	Splicing factor U2AF 65 kDa subunit OS=Mus musculus OX=10090 GN=U2af2 PE=1 SV=3	19.164	24	7	9	7	1	475	53.5	9.09	16.13	7
High	Q6ZQL4	WD repeat-containing protein 43 OS=Mus musculus OX=10090 GN=Wdr43 PE=1 SV=2	19.141	17	8	8	8	1	677	75.3	5.38	10.06	8
High	Q9CY58	Plasminogen activator inhibitor 1 RNA-binding protein OS=Mus musculus OX=10090 GN=Serbp1 PE=1 SV=2	19.113	18	6	6	6	1	407	44.7	8.54	16.26	6
High	A0A5F8MPW9	Paternally-expressed gene 3 protein OS=Mus musculus OX=10090 GN=Peg3 PE=1 SV=1	18.962	6	7	8	7	1	1632	185.6	5.5	7.58	7
High	Q9CQI7	U2 small nuclear ribonucleoprotein B'' OS=Mus musculus OX=10090 GN=Snrpb2 PE=1 SV=1	18.865	36	7	9	5	1	225	25.3	9.72	24.4	7
High	Q0VBL3	RNA-binding protein 15 OS=Mus musculus OX=10090 GN=Rbm15 PE=1 SV=1	18.835	11	7	7	7	1	962	105.7	10.08	14.11	7
High	A2RS68	U1 small nuclear ribonucleoprotein 70 kDa OS=Mus musculus OX=10090 GN=Snrnp70 PE=2 SV=1	18.741	22	9	10	9	1	448	52	9.94	13.29	9
High	Q3UDK3	AAA domain-containing protein OS=Mus musculus OX=10090 GN=Rfc5 PE=2 SV=1	18.679	32	8	8	8	1	339	38	7.81	14.13	8
High	Q9CXK8	60S ribosome subunit biogenesis protein NIP7 homolog OS=Mus musculus OX=10090 GN=Nip7 PE=1 SV=1	18.657	48	5	6	5	1	180	20.4	8.24	11.51	5
High	A0A0R4J0R3	Interferon-stimulated 20 kDa exonuclease-like 2 OS=Mus musculus OX=10090 GN=Isg20l2 PE=1 SV=1	18.649	22	7	7	7	1	368	41	9.98	10.54	7
High	Q9ESX4	Nucleolar protein of 40 kDa OS=Mus musculus OX=10090 GN=Zcchc17 PE=1 SV=1	18.599	27	6	7	6	1	241	27.5	9.63	12.78	6
High	Q3UH59	Myosin-10 OS=Mus musculus OX=10090 GN=Myh10 PE=1 SV=1	18.59	5	7	7	5	1	2013	233.3	5.57	5.9	7
High	P30415	NK-tumor recognition protein OS=Mus musculus OX=10090 GN=Nktr PE=1 SV=4	18.566	7	7	7	7	1	1453	163.4	10.05	10.38	7
High	Q5SXC4	Vascular endothelial zinc finger 1 OS=Mus musculus OX=10090 GN=Vezf1 PE=1 SV=1	18.477	16	8	9	7	1	518	56.5	9.57	6.37	8
High	Q8BMA6	Signal recognition particle subunit SRP68 OS=Mus musculus OX=10090 GN=Srp68 PE=1 SV=2	18.436	14	6	6	6	1	625	70.5	8.57	12.57	6
High	D3YWX2	YLP motif-containing protein 1 OS=Mus musculus OX=10090 GN=Ylpm1 PE=1 SV=2	18.396	4	6	6	6	1	2139	240.9	6.68	11.61	6
High	Q9JM93	ADP-ribosylation factor-like protein 6-interacting protein 4 OS=Mus musculus OX=10090 GN=Arl6ip4 PE=1 SV=1	18.277	25	4	7	4	1	229	25.5	11.19	13.88	4
High	Q9CWZ3	RNA-binding protein 8A OS=Mus musculus OX=10090 GN=Rbm8a PE=1 SV=4	18.263	41	5	7	5	1	174	19.9	5.72	18.6	5
High	Q3TIX9	U4/U6.U5 tri-snRNP-associated protein 2 OS=Mus musculus OX=10090 GN=Usp39 PE=1 SV=2	18.251	15	8	8	8	1	564	65.1	8.9	10.77	8
High	Q3TZX8	Polynucleotide 5'-hydroxyl-kinase NOL9 OS=Mus musculus OX=10090 GN=Nol9 PE=1 SV=1	18.128	13	7	8	7	1	714	80.8	9.45	11.88	7
High	G3X9Q6	La-related protein 4 OS=Mus musculus OX=10090 GN=Larp4 PE=1 SV=1	18.089	13	7	7	7	1	719	79.7	6.51	15.45	7
High	Q3UXI9	DZF domain-containing protein OS=Mus musculus OX=10090 GN=Ilf2 PE=2 SV=1	18.012	18	7	8	7	1	390	43	5.14	13.36	7
High	O35218	Cleavage and polyadenylation specificity factor subunit 2 OS=Mus musculus OX=10090 GN=Cpsf2 PE=1 SV=1	17.987	13	8	8	8	1	782	88.3	5.11	10.34	8
High	O08579	Emerin OS=Mus musculus OX=10090 GN=Emd PE=1 SV=1	17.699	26	6	6	6	1	259	29.4	5.01	12.27	6
High	Q99JX4	Eukaryotic translation initiation factor 3 subunit M OS=Mus musculus OX=10090 GN=Eif3m PE=1 SV=1	17.624	24	6	6	6	1	374	42.5	5.74	11.68	6
High	P40201	Chromodomain-helicase-DNA-binding protein 1 OS=Mus musculus OX=10090 GN=Chd1 PE=1 SV=3	17.605	5	9	9	4	1	1711	196.3	7.37	5.7	9
High	A0A0A6YX26	60S ribosomal protein L31 OS=Mus musculus OX=10090 GN=Rpl31 PE=1 SV=1	17.583	44	8	9	8	1	129	15	10.61	19.08	8
High	Q3TAB2	Uncharacterized protein (Fragment) OS=Mus musculus OX=10090 GN=Tcof1 PE=2 SV=1	17.376	14	7	8	2	1	696	72.1	9.14	11.51	7
High	Q71LX8	Heat shock protein 84b OS=Mus musculus OX=10090 GN=Hsp90ab1 PE=1 SV=1	17.364	11	6	6	2	1	724	83.2	5.03	13.61	6
High	Q91VE6	MKI67 FHA domain-interacting nucleolar phosphoprotein OS=Mus musculus OX=10090 GN=Nifk PE=1 SV=1	17.313	25	6	6	6	1	317	36.2	10.24	9.73	6
High	P62858	40S ribosomal protein S28 OS=Mus musculus OX=10090 GN=Rps28 PE=1 SV=1	17.308	57	5	7	5	1	69	7.8	10.7	18.7	5
High	Q6ZQ58	La-related protein 1 OS=Mus musculus OX=10090 GN=Larp1 PE=1 SV=3	17.273	8	8	8	8	1	1072	121.1	8.79	13.43	8
High	Q14C24	U2 small nuclear ribonucleoprotein auxiliary factor (U2AF) 1 OS=Mus musculus OX=10090 GN=U2af1 PE=1 SV=1	17.257	28	5	5	5	1	239	27.8	8.81	13.74	5
High	C0HKE5	Histone H2A type 1-G OS=Mus musculus OX=10090 GN=H2ac11 PE=1 SV=1	17.242	43	6	9	3	1	130	14.1	11.05	21.86	6
High	P48962	ADP/ATP translocase 1 OS=Mus musculus OX=10090 GN=Slc25a4 PE=1 SV=4	17.078	22	6	7	1	1	298	32.9	9.72	15.41	6
High	Q58E35	Ribosomal protein, large, P1 OS=Mus musculus OX=10090 GN=Rplp1 PE=1 SV=1	17.043	53	3	4	3	1	114	11.5	4.32	17.42	3
High	Q9Z1X4-3	Isoform 3 of Interleukin enhancer-binding factor 3 OS=Mus musculus OX=10090 GN=Ilf3	17.017	12	7	7	7	1	911	97.7	8.95	11.56	7
High	Q9Z2D6-2	Isoform B of Methyl-CpG-binding protein 2 OS=Mus musculus OX=10090 GN=Mecp2	16.957	15	6	6	6	1	501	53.5	9.88	11.7	6
High	Q91WM3	U3 small nucleolar RNA-interacting protein 2 OS=Mus musculus OX=10090 GN=Rrp9 PE=1 SV=1	16.821	18	7	7	7	1	475	52.1	7.88	9.69	7
High	Q5BLK2	40S ribosomal protein S20 OS=Mus musculus OX=10090 GN=Rps20 PE=1 SV=1	16.807	29	5	10	5	1	119	13.4	9.94	30.48	5
High	Q5SSI6	U3 small nucleolar RNA-associated protein 18 homolog OS=Mus musculus OX=10090 GN=Utp18 PE=1 SV=1	16.747	13	6	6	6	1	552	61.2	8.78	11.25	6
High	A0A097PUG4	Anti-lox-1 15C4 light chain OS=Mus musculus OX=10090 PE=2 SV=1	16.67	36	5	5	5	1	238	25.9	4.94	11.56	5
High	A0A1W2P768	Histone H3.2 OS=Mus musculus OX=10090 GN=H3c14 PE=1 SV=1	16.637	34	6	8	1	1	181	20.2	11.39	18.7	6
High	Q3UM18	Large subunit GTPase 1 homolog OS=Mus musculus OX=10090 GN=Lsg1 PE=1 SV=2	16.61	12	7	7	7	1	644	73.1	6.51	8.29	7
High	Q09XV5	Chromodomain-helicase-DNA-binding protein 8 OS=Mus musculus OX=10090 GN=Chd8 PE=1 SV=1	16.544	3	7	7	2	1	2582	290.7	6.42	12.74	7
High	A2AMU9	Ribosome assembly factor mrt4 OS=Mus musculus OX=10090 GN=Mrto4 PE=1 SV=1	16.392	35	9	10	9	1	239	27.5	8.54	9.01	9
High	P83870	PHD finger-like domain-containing protein 5A OS=Mus musculus OX=10090 GN=Phf5a PE=1 SV=1	16.231	61	6	6	6	1	110	12.4	8.41	13.1	6
High	Q3T9L0	RNA helicase OS=Mus musculus OX=10090 GN=Ddx39a PE=2 SV=1	16.163	21	7	7	1	1	427	49.1	5.68	8.61	7
High	Q6P9R1	ATP-dependent RNA helicase DDX51 OS=Mus musculus OX=10090 GN=Ddx51 PE=1 SV=1	15.936	11	6	6	6	1	639	70.3	9.47	12.19	6
High	Q9Z103	Activity-dependent neuroprotector homeobox protein OS=Mus musculus OX=10090 GN=Adnp PE=1 SV=2	15.9	7	6	6	6	1	1108	124.2	6.86	10.6	6
High	Q921N6	Probable ATP-dependent RNA helicase DDX27 OS=Mus musculus OX=10090 GN=Ddx27 PE=1 SV=3	15.793	11	8	8	8	1	760	85.9	9.25	10.25	8
High	A0A668KL68	NF-kappa-B-repressing factor OS=Mus musculus OX=10090 GN=Nkrf PE=1 SV=1	15.765	9	6	7	6	1	784	88.2	8.9	10.39	6
High	Q640M1	U3 small nucleolar RNA-associated protein 14 homolog A OS=Mus musculus OX=10090 GN=Utp14a PE=1 SV=1	15.747	8	5	5	5	1	767	87.2	9.2	11.43	5
High	Q9CPS7	RNA-binding protein PNO1 OS=Mus musculus OX=10090 GN=Pno1 PE=1 SV=1	15.546	31	5	5	5	1	248	27.4	9.79	10.82	5
High	Q9D0F4	NF-kappa-B-activating protein OS=Mus musculus OX=10090 GN=Nkap PE=2 SV=1	15.532	12	4	5	4	1	415	47.2	10.13	12.09	4
High	Q4VAF2	Ribosomal protein L37a OS=Mus musculus OX=10090 GN=Rpl37a PE=1 SV=1	15.497	51	5	10	5	1	92	10.3	10.43	17.76	5
High	Q8BZR9	Nuclear cap-binding protein subunit 3 OS=Mus musculus OX=10090 GN=Ncbp3 PE=1 SV=1	15.475	11	7	7	7	1	615	70	5.8	8.73	7
High	Q8C4J7	Transducin beta-like protein 3 OS=Mus musculus OX=10090 GN=Tbl3 PE=2 SV=1	15.371	10	6	6	6	1	801	88.2	6.81	8.82	6
High	Q8VDD5	Myosin-9 OS=Mus musculus OX=10090 GN=Myh9 PE=1 SV=4	15.229	4	6	6	4	1	1960	226.2	5.66	5.97	6
High	A0A2I3BPG9	Ribosomal protein L36A, pseudogene 1 OS=Mus musculus OX=10090 GN=Rpl36a-ps1 PE=3 SV=1	15.177	27	6	6	6	1	106	12.4	10.51	11.62	6
High	Q91XU0	ATPase WRNIP1 OS=Mus musculus OX=10090 GN=Wrnip1 PE=1 SV=2	15.11	8	5	5	5	1	660	71.7	6.18	9.37	5
High	Q9JJI8	60S ribosomal protein L38 OS=Mus musculus OX=10090 GN=Rpl38 PE=1 SV=3	15.076	49	5	13	5	1	70	8.2	10.1	25.37	5
High	O55201	Transcription elongation factor SPT5 OS=Mus musculus OX=10090 GN=Supt5h PE=1 SV=1	15.043	7	6	6	6	1	1082	120.6	5.05	7.87	6
High	P62852	40S ribosomal protein S25 OS=Mus musculus OX=10090 GN=Rps25 PE=1 SV=1	15.038	41	6	12	6	1	125	13.7	10.11	25.9	6
High	Q3U8X1	Eukaryotic translation initiation factor 3 subunit F OS=Mus musculus OX=10090 GN=Eif3f PE=2 SV=1	15.021	20	5	5	5	1	361	38	5.58	9.52	5
High	E9QNP0	60S ribosomal protein L40 OS=Mus musculus OX=10090 GN=Kxd1 PE=1 SV=1	15.003	19	4	7	1	1	232	26.8	9.83	20.87	4
High	Q02526	Zinc finger protein 41 OS=Mus musculus OX=10090 GN=Zfp41 PE=2 SV=2	14.877	36	5	5	5	1	198	22.7	9.8	11.01	5
High	A0A1B0GSQ6	60S ribosomal protein L13a (Fragment) OS=Mus musculus OX=10090 GN=Rpl13a PE=3 SV=1	14.859	44	7	10	7	1	167	19	11.49	17.2	7
High	Q9CXK9	RNA-binding protein 33 OS=Mus musculus OX=10090 GN=Rbm33 PE=1 SV=2	14.837	7	6	6	6	1	1231	137.2	6.46	7.39	6
High	Q9CYI4	Putative RNA-binding protein Luc7-like 1 OS=Mus musculus OX=10090 GN=Luc7l PE=1 SV=2	14.829	15	5	6	1	1	371	43.9	9.88	11.56	5
High	Q6ZWY3	40S ribosomal protein S27-like OS=Mus musculus OX=10090 GN=Rps27l PE=1 SV=3	14.796	40	5	6	2	1	84	9.5	9.45	6.38	5
High	O35295	Transcriptional activator protein Pur-beta OS=Mus musculus OX=10090 GN=Purb PE=1 SV=3	14.748	20	5	6	5	1	324	33.9	5.43	14.92	5
High	D3U0D6	Kidney highly expressed protein 1 OS=Mus musculus OX=10090 GN=Rrp7a PE=2 SV=1	14.737	20	5	5	5	1	280	32.4	9.54	8.17	5
High	Q9DB96	Neuroguidin OS=Mus musculus OX=10090 GN=Ngdn PE=1 SV=1	14.69	21	5	6	5	1	315	35.6	9.58	12.5	5
High	Q99LX5	Multiple myeloma tumor-associated protein 2 homolog OS=Mus musculus OX=10090 GN=Mmtag2 PE=2 SV=1	14.676	21	5	5	5	1	260	29.3	9.86	7.32	5
High	P62267	40S ribosomal protein S23 OS=Mus musculus OX=10090 GN=Rps23 PE=1 SV=3	14.635	42	5	7	5	1	143	15.8	10.49	16.9	5
High	O55142	60S ribosomal protein L35a OS=Mus musculus OX=10090 GN=Rpl35a PE=1 SV=2	14.539	41	7	11	7	1	110	12.5	10.89	14.85	7
High	Q3U6Q1	Uncharacterized protein OS=Mus musculus OX=10090 GN=Wbp11 PE=2 SV=1	14.522	9	5	5	5	1	641	69.8	8.62	9.82	5
High	Q3U7F6	Uncharacterized protein OS=Mus musculus OX=10090 GN=Zfp422 PE=2 SV=1	14.4	28	6	7	6	1	237	27.3	10.37	7.12	6
High	Q3TTV6	Tuftelin-interacting protein 11 OS=Mus musculus OX=10090 GN=Tfip11 PE=1 SV=1	14.318	7	5	5	5	1	838	96.2	5.9	11.28	5
High	Q91YU8	Suppressor of SWI4 1 homolog OS=Mus musculus OX=10090 GN=Ppan PE=1 SV=2	14.31	12	5	7	5	1	470	52.7	10.32	9.1	5
High	E9PU96	Nucleolar pre-ribosomal-associated protein 1 OS=Mus musculus OX=10090 GN=Urb1 PE=1 SV=1	14.301	4	5	5	5	1	2277	254.7	6.96	12.36	5
High	P97477-2	Isoform 2 of Aurora kinase A OS=Mus musculus OX=10090 GN=Aurka	14.129	15	5	5	4	1	417	47.1	9.36	10.13	5
High	Q02614	SAP30-binding protein OS=Mus musculus OX=10090 GN=Sap30bp PE=1 SV=2	14.03	19	5	5	5	1	308	33.8	4.87	12.65	5
High	Q02257	Junction plakoglobin OS=Mus musculus OX=10090 GN=Jup PE=1 SV=3	13.828	9	6	6	6	1	745	81.7	6.14	1.75	6
High	E9PZM4	Chromodomain-helicase-DNA-binding protein 2 OS=Mus musculus OX=10090 GN=Chd2 PE=1 SV=1	13.759	4	7	7	2	1	1827	210.7	8.06	5.81	7
High	Q3THH1	Protein disulfide-isomerase A6 OS=Mus musculus OX=10090 GN=Pdia6 PE=2 SV=1	13.653	16	5	5	5	1	445	48.6	5.19	9.45	5
High	A0A0R4J008	Histone deacetylase 2 OS=Mus musculus OX=10090 GN=Hdac2 PE=1 SV=1	13.643	11	5	5	3	1	488	55.3	5.91	11.35	5
High	Q9D0T1	NHP2-like protein 1 OS=Mus musculus OX=10090 GN=Snu13 PE=1 SV=4	13.605	46	5	6	5	1	128	14.2	8.46	11.43	5
High	F8VPV0	Pericentrin OS=Mus musculus OX=10090 GN=Pcnt PE=1 SV=1	13.563	3	6	6	6	1	2916	331.1	5.38	1.99	6
High	B2RWX2	C4a anaphylatoxin OS=Mus musculus OX=10090 GN=C4b PE=2 SV=1	13.501	3	4	5	4	1	1738	192.8	7.47	15.8	4
High	P11031	Activated RNA polymerase II transcriptional coactivator p15 OS=Mus musculus OX=10090 GN=Sub1 PE=1 SV=3	13.456	37	4	4	4	1	127	14.4	9.6	11.38	4
High	O09106	Histone deacetylase 1 OS=Mus musculus OX=10090 GN=Hdac1 PE=1 SV=1	13.293	15	6	6	4	1	482	55	5.48	11.66	6
High	P59708	Splicing factor 3B subunit 6 OS=Mus musculus OX=10090 GN=Sf3b6 PE=1 SV=1	13.257	41	4	4	4	1	125	14.6	9.38	11.25	4
High	P0C0S6	Histone H2A.Z OS=Mus musculus OX=10090 GN=H2az1 PE=1 SV=2	13.193	31	5	8	3	1	128	13.5	10.58	20.59	5
High	Q8BYH8	Chromodomain-helicase-DNA-binding protein 9 OS=Mus musculus OX=10090 GN=Chd9 PE=1 SV=2	13.066	2	6	6	2	1	2885	323.7	7.5	6.06	6
High	Q542P8	Uncharacterized protein OS=Mus musculus OX=10090 GN=Emg1 PE=1 SV=1	12.991	32	6	6	6	1	244	27	8.91	5.24	6
High	Q3TAQ9	WD repeat domain 36 OS=Mus musculus OX=10090 GN=Wdr36 PE=1 SV=1	12.916	6	5	5	5	1	899	99.7	7.11	6.01	5
High	Q8R0F5	RNA-binding motif protein, X-linked 2 OS=Mus musculus OX=10090 GN=Rbmx2 PE=1 SV=1	12.896	14	4	4	4	1	326	37.5	9.72	10.09	4
High	Q69ZP6	MKIAA1178 protein (Fragment) OS=Mus musculus OX=10090 GN=Cd2bp2 PE=2 SV=1	12.868	16	4	4	4	1	346	38.1	4.6	9.84	4
High	Q8BJ71	Nuclear pore complex protein Nup93 OS=Mus musculus OX=10090 GN=Nup93 PE=1 SV=1	12.865	7	5	5	5	1	819	93.2	5.72	9.3	5
High	P46660	Alpha-internexin OS=Mus musculus OX=10090 GN=Ina PE=1 SV=3	12.864	12	5	5	4	1	501	55.3	5.4	6.13	5
High	Q9CX86	Heterogeneous nuclear ribonucleoprotein A0 OS=Mus musculus OX=10090 GN=Hnrnpa0 PE=1 SV=1	12.788	19	4	5	3	1	305	30.5	9.31	8.97	4
High	Q3V1H1	Cytoskeleton-associated protein 2 OS=Mus musculus OX=10090 GN=Ckap2 PE=1 SV=1	12.772	9	5	5	5	1	664	74	9.23	7.32	5
High	H3BLH0	Probable global transcription activator SNF2L2 OS=Mus musculus OX=10090 GN=Smarca2 PE=1 SV=1	12.682	5	7	7	7	1	1601	182.6	7.14	7.8	7
High	Q6ZPE9	MKIAA3013 protein (Fragment) OS=Mus musculus OX=10090 GN=Scaf11 PE=2 SV=1	12.644	4	5	6	5	1	1461	162.4	6.62	7.86	5
High	B2CSK2	Heat shock protein 1-like protein OS=Mus musculus OX=10090 PE=3 SV=1	12.595	8	4	4	1	1	641	70.6	6.24	7.87	4
High	A0A1S6GWK5	GCFC domain-containing protein OS=Mus musculus OX=10090 GN=Paxbp1 PE=2 SV=1	12.557	7	5	5	5	1	971	109.8	5.82	8.41	5
High	Q922M5	Cell division cycle-associated 7-like protein OS=Mus musculus OX=10090 GN=Cdca7l PE=1 SV=1	12.487	14	7	7	7	1	438	50.2	7.65	7.2	7
High	M1VMF6	Metastasis-associated protein MTA1 isoform 9 OS=Mus musculus OX=10090 GN=Mta1 PE=2 SV=1	12.481	9	6	6	4	1	730	82.3	9.22	2.56	6
High	A0A1D5RML8	DNA-directed RNA polymerase II subunit RPB3 OS=Mus musculus OX=10090 GN=Polr2c PE=1 SV=1	12.466	15	4	4	4	1	439	48.3	6.05	7.69	4
High	O55029	Coatomer subunit beta' OS=Mus musculus OX=10090 GN=Copb2 PE=1 SV=2	12.323	6	5	6	5	1	905	102.4	5.3	9.62	5
High	G3UXA6	Polypyrimidine tract-binding protein 3 OS=Mus musculus OX=10090 GN=Ptbp3 PE=1 SV=1	12.319	12	6	7	3	1	554	59.7	8.94	11.42	6
High	Q497N1	40S ribosomal protein S26 OS=Mus musculus OX=10090 GN=Rps26 PE=1 SV=1	12.115	37	3	4	3	1	115	13	11	13.05	3
High	A0A2I3BPQ5	Zinc finger CCCH domain-containing protein 13 OS=Mus musculus OX=10090 GN=Zc3h13 PE=1 SV=1	12.114	3	4	4	4	1	1730	203.7	9.38	5.43	4
High	Q8CCF0	U4/U6 small nuclear ribonucleoprotein Prp31 OS=Mus musculus OX=10090 GN=Prpf31 PE=1 SV=3	12.045	11	5	5	5	1	499	55.4	5.67	4.8	5
High	Q9JIF7	Coatomer subunit beta OS=Mus musculus OX=10090 GN=Copb1 PE=1 SV=1	12.039	6	5	5	5	1	953	107	6	8.11	5
High	Q9CXW4	60S ribosomal protein L11 OS=Mus musculus OX=10090 GN=Rpl11 PE=1 SV=4	12.009	24	4	6	4	1	178	20.2	9.6	15.21	4
High	P48678	Prelamin-A/C OS=Mus musculus OX=10090 GN=Lmna PE=1 SV=2	11.994	10	6	6	5	1	665	74.2	6.98	6.11	6
High	Q3U5M2	Pre-mRNA-splicing factor SPF27 OS=Mus musculus OX=10090 GN=Bcas2 PE=2 SV=1	11.872	26	5	5	5	1	225	26.1	5.35	10.76	5
High	Q9CRB2	H/ACA ribonucleoprotein complex subunit 2 OS=Mus musculus OX=10090 GN=Nhp2 PE=1 SV=1	11.783	35	3	3	3	1	153	17.2	8.41	6.26	3
High	Q6PAQ4	RNA exonuclease 4 OS=Mus musculus OX=10090 GN=Rexo4 PE=2 SV=2	11.768	9	4	4	4	1	432	47.6	9.91	8.4	4
High	A0A0A0MQF6	Glyceraldehyde-3-phosphate dehydrogenase OS=Mus musculus OX=10090 GN=Gapdh PE=1 SV=1	11.745	21	5	5	5	1	359	38.6	8.97	6.92	5
High	E9QKD1	Nucleolar protein 8 OS=Mus musculus OX=10090 GN=Nol8 PE=1 SV=1	11.738	6	5	5	5	1	1165	130.6	6.51	5.66	5
High	Q6ZPZ3	Zinc finger CCCH domain-containing protein 4 OS=Mus musculus OX=10090 GN=Zc3h4 PE=1 SV=2	11.694	6	5	5	5	1	1304	140.9	6.27	4.33	5
High	Q64522	Histone H2A type 2-B OS=Mus musculus OX=10090 GN=H2ac21 PE=1 SV=3	11.665	35	4	6	2	1	130	14	10.89	13.78	4
High	O54962	Barrier-to-autointegration factor OS=Mus musculus OX=10090 GN=Banf1 PE=1 SV=1	11.646	43	3	6	3	1	89	10.1	6.09	17.4	3
High	Q6NZQ3	Sm protein F (Fragment) OS=Mus musculus OX=10090 GN=Snrpf PE=2 SV=1	11.595	19	3	4	3	1	112	12.2	5.03	9.76	3
High	Q3TE95	Uncharacterized protein OS=Mus musculus OX=10090 GN=Rcn2 PE=2 SV=1	11.563	20	4	4	4	1	355	41	4.59	8.45	4
High	D3Z5F7	Predicted gene 20521 OS=Mus musculus OX=10090 GN=Gm20521 PE=3 SV=1	11.474	17	4	4	4	1	333	37.2	8.4	9.47	4
High	Q792Z1	Trypsin 10 OS=Mus musculus OX=10090 GN=Try10 PE=1 SV=1	11.42	27	3	6	2	1	246	26.2	5.83	13.33	3
High	Q9D7Z3	Nucleolar protein 7 OS=Mus musculus OX=10090 GN=Nol7 PE=1 SV=1	11.393	21	4	4	4	1	254	29	9.61	8.19	4
High	P70168	Importin subunit beta-1 OS=Mus musculus OX=10090 GN=Kpnb1 PE=1 SV=2	11.286	6	4	4	4	1	876	97.1	4.78	8.54	4
High	Q3V1X4	Uncharacterized protein OS=Mus musculus OX=10090 GN=Surf6 PE=2 SV=1	11.235	14	5	5	5	1	355	41.2	10.52	8.69	5
High	B2RRT9	Zinc finger Ran-binding domain-containing protein 2 OS=Mus musculus OX=10090 GN=Zranb2 PE=1 SV=1	11.217	11	4	4	4	1	330	37.3	9.89	9.3	4
High	Q9D8M4	60S ribosomal protein L7-like 1 OS=Mus musculus OX=10090 GN=Rpl7l1 PE=1 SV=1	11.126	20	4	4	4	1	246	28.5	10.64	5.19	4
High	Q8CJF7	Protein ELYS OS=Mus musculus OX=10090 GN=Ahctf1 PE=1 SV=1	11.118	5	6	6	6	1	2243	247.5	6.55	9.64	6
High	D3YZK4	Transcription initiation factor TFIID subunit OS=Mus musculus OX=10090 GN=Taf1 PE=1 SV=1	10.957	3	5	5	5	1	1902	215.7	5.17	3.02	5
High	G3UW85	Enhancer of rudimentary homolog OS=Mus musculus OX=10090 GN=Erh PE=1 SV=1	10.919	28	3	6	3	1	123	14.3	5.54	14.5	3
High	Q8BGS0	Protein MAK16 homolog OS=Mus musculus OX=10090 GN=Mak16 PE=1 SV=1	10.909	13	4	4	4	1	296	35.2	5.31	6.88	4
High	Q78P92	FSHD Region Gene 1 protein OS=Mus musculus OX=10090 GN=Frg1 PE=1 SV=1	10.86	17	4	4	4	1	258	29.1	8.92	5.39	4
High	Q5DTN5	RNA helicase (Fragment) OS=Mus musculus OX=10090 GN=Dhx8 PE=2 SV=1	10.854	4	5	6	4	1	1264	144.8	8.12	7.83	5
High	G3X963	ATPase family AAA domain-containing protein 2 OS=Mus musculus OX=10090 GN=Atad2 PE=1 SV=1	10.822	4	5	5	5	1	1364	155.2	7.2	5.66	5
High	Q8CEW9	Splicing factor 3B subunit 5 OS=Mus musculus OX=10090 GN=Sf3b5 PE=2 SV=1	10.764	28	2	3	2	1	86	10.2	6.67	9.96	2
High	P70372	ELAV-like protein 1 OS=Mus musculus OX=10090 GN=Elavl1 PE=1 SV=2	10.762	14	4	5	4	1	326	36.1	9.04	9.66	4
High	A0A1S6GWH8	Nuclear cap-binding protein subunit 2 OS=Mus musculus OX=10090 GN=Ncbp2 PE=2 SV=1	10.731	21	4	6	4	1	195	22.7	8.41	10.97	4
High	F8VPY2	Transcription initiation factor TFIID subunit 5 OS=Mus musculus OX=10090 GN=Taf5 PE=1 SV=1	10.672	7	5	5	5	1	801	86.9	5.64	2.05	5
High	Q8K4P0	pre-mRNA 3' end processing protein WDR33 OS=Mus musculus OX=10090 GN=Wdr33 PE=1 SV=1	10.668	4	4	4	4	1	1330	145.2	9.13	5.08	4
High	P47757-4	Isoform 3 of F-actin-capping protein subunit beta OS=Mus musculus OX=10090 GN=Capzb	10.641	14	5	5	5	1	301	33.7	6.43	9.54	5
High	Q9CS00	Cactin OS=Mus musculus OX=10090 GN=Cactin PE=1 SV=2	10.537	7	4	4	4	1	772	90.6	9.79	6.27	4
High	Q61782	Type I epidermal keratin mRNA, 3'end (Fragment) OS=Mus musculus OX=10090 PE=2 SV=1	10.526	47	3	4	1	1	93	10.7	6.3	6.31	3
High	Q8R2S9	Actin-related protein 8 OS=Mus musculus OX=10090 GN=Actr8 PE=2 SV=1	10.421	9	5	5	5	1	624	70.5	7.77	5.32	5
High	Q69ZQ2	Pre-mRNA-splicing factor ISY1 homolog OS=Mus musculus OX=10090 GN=Isy1 PE=1 SV=2	10.387	16	3	3	3	1	285	33	5.17	8.04	3
High	Q9D8Z1	Activating signal cointegrator 1 complex subunit 1 OS=Mus musculus OX=10090 GN=Ascc1 PE=1 SV=1	10.362	13	5	5	5	1	356	41.3	6.54	5.67	5
High	Q8BHB4	WD repeat-containing protein 3 OS=Mus musculus OX=10090 GN=Wdr3 PE=1 SV=1	10.361	6	5	5	5	1	942	105.7	6.64	3.86	5
High	A0A1B0GSX7	Nuclear pore complex protein Nup96 OS=Mus musculus OX=10090 GN=Nup98 PE=1 SV=1	10.311	4	5	7	5	1	1816	197.2	6.15	3.81	5
High	D3YTQ3	Heterogeneous nuclear ribonucleoprotein D-like OS=Mus musculus OX=10090 GN=Hnrnpdl PE=1 SV=1	10.302	8	4	6	4	1	420	46.2	9.57	6.62	4
High	Q3TC91	Uncharacterized protein OS=Mus musculus OX=10090 GN=Cpsf3 PE=2 SV=1	10.296	7	4	4	4	1	684	77.5	5.71	6.11	4
High	P07901	Heat shock protein HSP 90-alpha OS=Mus musculus OX=10090 GN=Hsp90aa1 PE=1 SV=4	10.238	6	4	4	1	1	733	84.7	5.01	8.75	4
High	P47915	60S ribosomal protein L29 OS=Mus musculus OX=10090 GN=Rpl29 PE=1 SV=2	10.225	23	4	8	4	1	160	17.6	11.84	16.19	4
High	Q9ERG0	LIM domain and actin-binding protein 1 OS=Mus musculus OX=10090 GN=Lima1 PE=1 SV=3	10.113	5	3	3	3	1	753	84	6.6	6.23	3
High	Q6PIJ4	Nuclear factor related to kappa-B-binding protein OS=Mus musculus OX=10090 GN=Nfrkb PE=1 SV=1	10.089	4	5	5	5	1	1296	138.7	9.22	4.2	5
High	O70126	Aurora kinase B OS=Mus musculus OX=10090 GN=Aurkb PE=1 SV=2	10.077	12	4	4	3	1	345	39.4	9.44	5.99	4
High	A0A0G2JH17	Integrator complex subunit 1 OS=Mus musculus OX=10090 GN=Ints1 PE=1 SV=1	10.074	2	4	4	4	1	2222	247.8	6.34	3.77	4
High	Q8VI84	Nucleolar complex protein 3 homolog OS=Mus musculus OX=10090 GN=Noc3l PE=2 SV=2	10.06	8	4	5	4	1	807	93.2	9.09	9.67	4
High	F8WJA0	RNA helicase OS=Mus musculus OX=10090 GN=Ddx24 PE=1 SV=1	10.007	5	4	4	4	1	903	101.3	9.36	4.84	4
High	D3YXX1	Zinc finger MYND domain-containing protein 11 OS=Mus musculus OX=10090 GN=Zmynd11 PE=1 SV=1	9.988	9	5	5	5	1	604	70.2	9.11	6.14	5
High	Q921Y2	U3 small nucleolar ribonucleoprotein protein IMP3 OS=Mus musculus OX=10090 GN=Imp3 PE=2 SV=1	9.921	23	3	3	3	1	184	21.8	9.5	8.06	3
High	Q545V8	Protein kinase domain-containing protein OS=Mus musculus OX=10090 GN=Csnk2a2 PE=1 SV=1	9.868	9	3	4	2	1	350	41.2	8.56	4.85	3
High	Q6ZPH4	MKIAA1835 protein (Fragment) OS=Mus musculus OX=10090 GN=Rangap1 PE=2 SV=1	9.827	7	4	4	4	1	646	69.4	4.72	6.35	4
High	Q8BJW5	Nucleolar protein 11 OS=Mus musculus OX=10090 GN=Nol11 PE=2 SV=1	9.729	7	5	5	5	1	723	80.8	5.92	7.4	5
High	B9EJX8	Peptidyl-prolyl cis-trans isomerase OS=Mus musculus OX=10090 GN=Ppil1 PE=1 SV=1	9.69	25	3	4	3	1	166	18.2	7.99	9.35	3
High	A0A0J9YU32	60S ribosomal protein L6 (Fragment) OS=Mus musculus OX=10090 GN=Rpl6 PE=1 SV=1	9.635	35	4	4	1	1	74	8.3	11.63	7.38	4
High	A0A1I7Q4A6	Centromere protein Q OS=Mus musculus OX=10090 GN=Cenpq PE=1 SV=1	9.632	14	3	3	3	1	269	30.7	9.36	7.43	3
High	Q99JF8	PC4 and SFRS1-interacting protein OS=Mus musculus OX=10090 GN=Psip1 PE=1 SV=1	9.52	7	3	3	3	1	528	59.7	9.13	8.39	3
High	Q9CQF3	Cleavage and polyadenylation specificity factor subunit 5 OS=Mus musculus OX=10090 GN=Nudt21 PE=1 SV=1	9.442	15	4	4	4	1	227	26.2	8.82	7.07	4
High	Q8C6B9	Active regulator of SIRT1 OS=Mus musculus OX=10090 GN=Rps19bp1 PE=1 SV=1	9.41	38	4	5	4	1	143	16	10.83	3.92	4
High	Q3THA0	Eukaryotic translation initiation factor 3 subunit G OS=Mus musculus OX=10090 GN=Eif3g PE=2 SV=1	9.348	15	4	4	4	1	320	35.6	5.9	5.71	4
High	Q60960	Importin subunit alpha-5 OS=Mus musculus OX=10090 GN=Kpna1 PE=1 SV=2	9.318	9	4	4	4	1	538	60.1	5.01	6.73	4
High	O35344	Importin subunit alpha-4 OS=Mus musculus OX=10090 GN=Kpna3 PE=1 SV=1	9.306	9	4	4	4	1	521	57.7	4.94	6.3	4
High	Q3U821	WD repeat-containing protein 75 OS=Mus musculus OX=10090 GN=Wdr75 PE=1 SV=1	9.264	6	4	4	4	1	830	94	6.18	6.83	4
High	Q3UJX2	DUF1716 domain-containing protein OS=Mus musculus OX=10090 GN=Ctnnbl1 PE=2 SV=1	9.262	9	4	4	4	1	563	65	5.05	3.97	4
High	Q9CVI2	Protein FAM133B OS=Mus musculus OX=10090 GN=Fam133b PE=1 SV=3	9.241	14	4	4	4	1	245	27.9	10.07	6.18	4
High	Q3TXW9	HDAC_interact domain-containing protein OS=Mus musculus OX=10090 GN=Sin3b PE=2 SV=1	9.107	7	4	4	4	1	1098	126.3	7.14	0	4
High	Q60520-1	Isoform 2 of Paired amphipathic helix protein Sin3a OS=Mus musculus OX=10090 GN=Sin3a	9.066	3	3	3	3	1	1277	145.4	7.25	6.23	3
High	Q99PU8-3	Isoform 3 of ATP-dependent RNA helicase DHX30 OS=Mus musculus OX=10090 GN=Dhx30	9.026	3	4	4	4	1	1223	136.4	8.44	3.83	4
High	Q80UW8	DNA-directed RNA polymerases I, II, and III subunit RPABC1 OS=Mus musculus OX=10090 GN=Polr2e PE=1 SV=1	8.982	16	3	3	3	1	210	24.6	5.95	7.69	3
High	Q8R344	Coiled-coil domain-containing protein 12 OS=Mus musculus OX=10090 GN=Ccdc12 PE=1 SV=2	8.964	20	2	3	2	1	166	18.9	7.21	0	2
High	O35852	Alpha-neoendorphin (Fragment) OS=Mus musculus OX=10090 GN=Pdyn PE=1 SV=1	8.942	14	3	3	3	1	248	28	5.63	5.19	3
High	Q80XH9	ELAV-like protein OS=Mus musculus OX=10090 GN=Elavl4 PE=2 SV=1	8.928	13	4	4	3	1	412	45.3	9.28	3.85	4
High	E9Q6E5	Serine and arginine-rich-splicing factor 11 OS=Mus musculus OX=10090 GN=Srsf11 PE=1 SV=1	8.851	10	3	3	3	1	511	56.7	10.7	6.11	3
High	A2A7B5	PR domain-containing 2, with ZNF domain OS=Mus musculus OX=10090 GN=Prdm2 PE=1 SV=1	8.82	3	4	4	4	1	1709	187.1	8	4.3	4
High	P62305	Small nuclear ribonucleoprotein E OS=Mus musculus OX=10090 GN=Snrpe PE=1 SV=1	8.778	38	3	3	3	1	92	10.8	9.44	7.66	3
High	Q3US17	Zinc finger protein 48 OS=Mus musculus OX=10090 GN=Znf48 PE=1 SV=2	8.769	10	3	4	3	1	591	64.6	9.41	5.6	3
High	E9QNV2	Mediator complex subunit 23 OS=Mus musculus OX=10090 GN=Med23 PE=1 SV=1	8.728	3	3	3	3	1	1376	157	7.31	7.02	3
High	P62259	14-3-3 protein epsilon OS=Mus musculus OX=10090 GN=Ywhae PE=1 SV=1	8.72	12	3	3	1	1	255	29.2	4.74	6.43	3
High	Q80XR9	Rsrc1 protein (Fragment) OS=Mus musculus OX=10090 GN=Rsrc1 PE=2 SV=1	8.691	11	3	3	3	1	375	42.8	11.05	4.64	3
High	Q9D937	Uncharacterized protein C11orf98 homolog OS=Mus musculus OX=10090 PE=1 SV=1	8.677	27	4	5	4	1	123	14.1	11.47	6.11	4
High	Q62189	U1 small nuclear ribonucleoprotein A OS=Mus musculus OX=10090 GN=Snrpa PE=1 SV=3	8.639	18	4	4	2	1	287	31.8	9.8	9.84	4
High	G5E8E3	RIKEN cDNA 2310022A10 gene OS=Mus musculus OX=10090 GN=2310022A10Rik PE=1 SV=1	8.61	9	3	3	3	1	413	44.4	10.26	6.5	3
High	G4V4Z1	Capsid protein p30 OS=Mus musculus OX=10090 GN=gag-pro-pol PE=3 SV=1	8.533	2	3	3	3	1	1737	194.3	8.97	7.06	3
High	E9Q557	Desmoplakin OS=Mus musculus OX=10090 GN=Dsp PE=1 SV=1	8.52	1	4	4	4	1	2883	332.7	6.8	4.31	4
High	Q3TYK4	Uncharacterized protein OS=Mus musculus OX=10090 GN=Prkar1a PE=2 SV=1	8.495	6	3	3	3	1	510	57.2	6.89	4.96	3
High	Q3TN42	U3 small nucleolar RNA-associated protein 15 homolog OS=Mus musculus OX=10090 GN=Utp15 PE=2 SV=1	8.433	7	3	3	3	1	528	59.4	8.81	6.14	3
High	B2RUA1	Splicing factor, arginine/serine-rich 18 OS=Mus musculus OX=10090 GN=Pnisr PE=2 SV=1	8.416	5	4	4	4	1	814	93	10.07	2.77	4
High	Q3UNV7	Uncharacterized protein OS=Mus musculus OX=10090 GN=Mlf2 PE=1 SV=1	8.379	17	3	3	3	1	247	28	6.98	5.36	3
High	P63239	Neuroendocrine convertase 1 OS=Mus musculus OX=10090 GN=Pcsk1 PE=1 SV=1	8.378	6	4	4	4	1	753	84.1	6.43	3.72	4
High	Q64364	Tumor suppressor ARF OS=Mus musculus OX=10090 GN=Cdkn2a PE=1 SV=1	8.304	19	3	3	3	1	169	19.2	12.16	7.7	3
High	E9PWZ3	Ribosomal protein L3-like OS=Mus musculus OX=10090 GN=Rpl3l PE=1 SV=1	8.249	8	3	4	1	1	407	46.5	10.45	2.33	3
High	Q9DBZ5	Eukaryotic translation initiation factor 3 subunit K OS=Mus musculus OX=10090 GN=Eif3k PE=1 SV=1	8.187	18	3	3	3	1	218	25.1	4.93	7.17	3
High	Q3U4B0	Ribosomal RNA-processing protein 8 OS=Mus musculus OX=10090 GN=Rrp8 PE=2 SV=1	8.161	6	2	2	2	1	503	56.4	9.88	5.29	2
High	Q3TIV2	Uncharacterized protein OS=Mus musculus OX=10090 GN=Zc3h11a PE=2 SV=1	8.075	6	4	4	4	1	792	86.4	8.22	2.12	4
High	Q8JZU2	Tricarboxylate transport protein, mitochondrial OS=Mus musculus OX=10090 GN=Slc25a1 PE=1 SV=1	8.072	11	3	3	3	1	311	33.9	9.89	4.39	3
High	Q3TN28	Uncharacterized protein OS=Mus musculus OX=10090 GN=Xrcc1 PE=2 SV=1	8.05	7	3	3	3	1	631	69	6.13	6.42	3
High	P98063	Bone morphogenetic protein 1 OS=Mus musculus OX=10090 GN=Bmp1 PE=1 SV=2	8.014	6	5	6	5	1	991	111.6	6.95	6.01	5
High	Q3TAH3	Nucleoplasmin domain-containing protein OS=Mus musculus OX=10090 GN=Npm3 PE=2 SV=1	8.005	25	3	3	3	1	175	19	4.82	7.85	3
High	Q99L48	60S ribosomal export protein NMD3 OS=Mus musculus OX=10090 GN=Nmd3 PE=1 SV=1	8.003	7	3	3	3	1	503	57.6	7.17	3.89	3
High	Q9D945	Protein LLP homolog OS=Mus musculus OX=10090 GN=Llph PE=1 SV=1	7.953	22	3	4	3	1	130	15.4	10.36	7.26	3
High	P42669	Transcriptional activator protein Pur-alpha OS=Mus musculus OX=10090 GN=Pura PE=1 SV=1	7.796	12	3	4	3	1	321	34.9	6.44	6.38	3
High	P35922	Synaptic functional regulator FMR1 OS=Mus musculus OX=10090 GN=Fmr1 PE=1 SV=1	7.787	5	3	4	2	1	614	68.9	7.62	6.66	3
High	Q91V99	40S ribosomal protein S30 (Fragment) OS=Mus musculus OX=10090 GN=fau PE=3 SV=1	7.78	9	3	10	3	1	137	14.8	10.05	25.1	3
High	Q8K205	Processing of 1, ribonuclease P/MRP family, (S. cerevisiae) OS=Mus musculus OX=10090 GN=Pop1 PE=1 SV=1	7.767	3	3	3	3	1	1045	117.3	9.11	3.95	3
High	Q3T9T2	Uncharacterized protein OS=Mus musculus OX=10090 GN=Noc4l PE=2 SV=1	7.73	8	4	4	4	1	516	58.6	6.73	4.55	4
High	Q9JJA7	Cyclin-L2 OS=Mus musculus OX=10090 GN=Ccnl2 PE=1 SV=1	7.723	7	3	3	3	1	518	58	10.18	5.5	3
High	Q80U89	MKIAA0034 protein (Fragment) OS=Mus musculus OX=10090 GN=mKIAA0034 PE=3 SV=2	7.719	3	3	3	3	1	1684	192.4	5.6	7.09	3
High	I6L9I7	Cbx3 protein OS=Mus musculus OX=10090 GN=Cbx3 PE=2 SV=1	7.685	14	3	3	3	1	183	20.7	5.33	5.36	3
High	Q8VDP2	STING ER exit protein OS=Mus musculus OX=10090 GN=Steep1 PE=1 SV=1	7.665	15	3	3	3	1	222	25.6	8.73	2.14	3
High	Q6A0A9	Constitutive coactivator of PPAR-gamma-like protein 1 OS=Mus musculus OX=10090 GN=FAM120A PE=1 SV=2	7.641	4	3	3	3	1	1112	121.6	8.92	7.17	3
High	Q00547	Hyaluronan mediated motility receptor OS=Mus musculus OX=10090 GN=Hmmr PE=1 SV=4	7.622	10	3	3	3	1	794	91.7	5.52	4.75	3
High	Q3V2E0	Peptidase S1 domain-containing protein OS=Mus musculus OX=10090 GN=Try5 PE=2 SV=1	7.614	12	2	4	2	1	255	27.1	6.73	9.4	2
High	P63168	Dynein light chain 1, cytoplasmic OS=Mus musculus OX=10090 GN=Dynll1 PE=1 SV=1	7.591	13	2	3	2	1	89	10.4	7.4	8.11	2
High	D3Z357	Histone-lysine N-methyltransferase NSD3 OS=Mus musculus OX=10090 GN=Nsd3 PE=1 SV=1	7.582	4	4	4	4	1	1446	161.5	8.27	1.64	4
High	Q497V5	S1 RNA-binding domain-containing protein 1 OS=Mus musculus OX=10090 GN=Srbd1 PE=2 SV=3	7.524	5	4	4	4	1	982	110.2	8.78	5.2	4
High	A0A1L1SV25	Alpha-actinin-4 OS=Mus musculus OX=10090 GN=Actn4 PE=1 SV=1	7.453	3	3	3	3	1	932	107	5.36	0	3
High	Q9CQV8	14-3-3 protein beta/alpha OS=Mus musculus OX=10090 GN=Ywhab PE=1 SV=3	7.405	13	3	3	1	1	246	28.1	4.83	4.21	3
High	Q9QZE5	Coatomer subunit gamma-1 OS=Mus musculus OX=10090 GN=Copg1 PE=1 SV=1	7.402	5	3	3	3	1	874	97.5	5.35	4.11	3
High	A3KFM7	Chromodomain-helicase-DNA-binding protein 6 OS=Mus musculus OX=10090 GN=Chd6 PE=1 SV=1	7.353	1	4	4	1	1	2711	305.2	6.38	6.45	4
High	Q8BP71	RNA binding protein fox-1 homolog 2 OS=Mus musculus OX=10090 GN=Rbfox2 PE=1 SV=2	7.335	7	3	3	3	1	449	47.3	6.55	4.75	3
High	A0A4E9FSP6	IgL2 (Fragment) OS=Mus musculus OX=10090 GN=IGLC2 PE=4 SV=1	7.316	38	2	2	2	1	92	9.9	6.51	6.64	2
High	Q3UL36	Arginine and glutamate-rich protein 1 OS=Mus musculus OX=10090 GN=Arglu1 PE=1 SV=2	7.274	11	4	5	4	1	271	32.9	10.36	6.05	4
High	Q3THS8	Uncharacterized protein OS=Mus musculus OX=10090 GN=Rcl1 PE=2 SV=1	7.264	9	3	3	3	1	373	40.8	9.26	4.1	3
High	Q810V0	U3 small nucleolar ribonucleoprotein protein MPP10 OS=Mus musculus OX=10090 GN=Mphosph10 PE=1 SV=2	7.253	6	3	3	3	1	681	78.7	4.87	2.19	3
High	A2ABV5	Mediator of RNA polymerase II transcription subunit 14 OS=Mus musculus OX=10090 GN=Med14 PE=1 SV=1	7.215	3	3	3	3	1	1459	160.9	8.53	1.98	3
High	K4DI59	DNA ligase OS=Mus musculus OX=10090 GN=Lig3 PE=1 SV=1	7.214	3	3	3	3	1	1016	113.1	8.98	4.15	3
High	A0A0A0MQ89	Actin-related protein 5 OS=Mus musculus OX=10090 GN=Actr5 PE=1 SV=1	7.195	7	3	3	3	1	608	68.1	5.16	2.57	3
High	G3UY53	Predicted gene 2381 OS=Mus musculus OX=10090 GN=Gm2381 PE=4 SV=1	7.175	10	2	2	2	1	305	36.4	9.35	2.52	2
High	Q8BU03	Periodic tryptophan protein 2 homolog OS=Mus musculus OX=10090 GN=Pwp2 PE=1 SV=1	7.106	4	3	3	3	1	919	102.8	6.23	1.67	3
High	Q52KE7	Cyclin-L1 OS=Mus musculus OX=10090 GN=Ccnl1 PE=1 SV=1	7.025	5	2	2	2	1	532	60.1	10.7	5.8	2
High	Q3TKG5	H/ACA ribonucleoprotein complex subunit OS=Mus musculus OX=10090 GN=Gar1 PE=2 SV=1	6.996	16	3	4	3	1	231	23.5	11.02	5.52	3
High	A0A0U1RPL0	Ataxin-2-like protein OS=Mus musculus OX=10090 GN=Atxn2l PE=1 SV=1	6.949	5	4	4	4	1	1096	115.2	8.66	1.65	4
High	Q5EBP9	Tripartite motif-containing 28 OS=Mus musculus OX=10090 GN=Trim28 PE=2 SV=1	6.939	4	3	3	3	1	834	88.8	5.77	4.01	3
High	Q80SY5	Pre-mRNA-splicing factor 38B OS=Mus musculus OX=10090 GN=Prpf38b PE=1 SV=1	6.919	7	3	3	3	1	542	63.7	10.54	0	3
High	P56959	RNA-binding protein FUS OS=Mus musculus OX=10090 GN=Fus PE=1 SV=1	6.901	7	3	4	3	1	518	52.6	9.36	1.63	3
High	Q6NZL1	DEAH (Asp-Glu-Ala-His) box polypeptide 37 OS=Mus musculus OX=10090 GN=Dhx37 PE=1 SV=1	6.894	3	3	3	3	1	1150	128.2	8.79	1.81	3
High	Q9D7M8	DNA-directed RNA polymerase II subunit RPB4 OS=Mus musculus OX=10090 GN=Polr2d PE=1 SV=2	6.893	27	3	3	3	1	142	16.3	4.79	5.89	3
High	Q8BGA5	KRR1 small subunit processome component homolog OS=Mus musculus OX=10090 GN=Krr1 PE=2 SV=1	6.852	6	2	2	2	1	380	43.5	9.79	4.56	2
High	Q925Q8	Dachshund homolog 2 OS=Mus musculus OX=10090 GN=Dach2 PE=1 SV=1	6.839	5	3	3	2	1	634	68.5	8.94	4.37	3
High	Q3UBZ3	F-actin-capping protein subunit alpha OS=Mus musculus OX=10090 GN=Capza2 PE=2 SV=1	6.799	16	3	3	3	1	286	33	5.85	4.72	3
High	S4R2L4	Arginine/serine-rich coiled-coil protein 2 OS=Mus musculus OX=10090 GN=Rsrc2 PE=1 SV=1	6.77	8	3	3	3	1	434	50.6	11.36	5.59	3
High	Q8VI94	2'-5'-oligoadenylate synthase-like protein 1 OS=Mus musculus OX=10090 GN=Oasl1 PE=2 SV=1	6.765	8	3	3	3	1	511	59.1	7.14	2.69	3
High	Q6P5B0	RRP12-like protein OS=Mus musculus OX=10090 GN=Rrp12 PE=1 SV=1	6.746	2	3	4	3	1	1295	143	8.91	3.71	3
High	A8DUV1	Alpha-globin OS=Mus musculus OX=10090 GN=Hbat1 PE=3 SV=1	6.743	32	2	2	1	1	142	15.1	8.22	4.83	2
High	D3Z0K6	Round spermatid basic protein 1-like OS=Mus musculus OX=10090 GN=Rsbn1l PE=1 SV=1	6.741	4	3	4	3	1	821	91.7	8.95	5.97	3
High	Q91YN9	BAG family molecular chaperone regulator 2 OS=Mus musculus OX=10090 GN=Bag2 PE=1 SV=1	6.733	14	3	3	3	1	210	23.5	6.42	1.67	3
High	Q9JI13	Something about silencing protein 10 OS=Mus musculus OX=10090 GN=Utp3 PE=1 SV=1	6.724	5	2	2	2	1	469	53.4	5.54	4.15	2
High	P62309	Small nuclear ribonucleoprotein G OS=Mus musculus OX=10090 GN=Snrpg PE=1 SV=1	6.702	17	2	2	2	1	76	8.5	8.88	6.35	2
High	O54825	Bystin OS=Mus musculus OX=10090 GN=Bysl PE=1 SV=3	6.688	7	3	3	3	1	436	49.8	7.78	4.12	3
High	Q7TSZ8	Nucleus accumbens-associated protein 1 OS=Mus musculus OX=10090 GN=Nacc1 PE=1 SV=1	6.687	7	3	3	3	1	514	56.5	5.73	1.87	3
High	Q7TMN8	Zfp420 protein OS=Mus musculus OX=10090 GN=Zfp420 PE=1 SV=1	6.682	8	2	2	2	1	578	67	9.07	2.89	2
High	P56183	Ribosomal RNA processing protein 1 homolog A OS=Mus musculus OX=10090 GN=Rrp1 PE=1 SV=2	6.677	5	2	2	2	1	494	54.7	5.17	5.48	2
High	Q9D104	Signal recognition particle 19 kDa protein OS=Mus musculus OX=10090 GN=Srp19 PE=1 SV=1	6.66	19	2	2	2	1	144	16.1	9.88	2.46	2
High	Q9Z2D8	Methyl-CpG-binding domain protein 3 OS=Mus musculus OX=10090 GN=Mbd3 PE=1 SV=1	6.658	13	3	3	3	1	285	32.1	5.82	2.79	3
High	A8DUV3	Alpha-globin OS=Mus musculus OX=10090 GN=Hbat1 PE=3 SV=1	6.585	32	2	2	1	1	142	15.1	8.22	5.4	2
High	H7BX49	WD repeat-containing protein 90 OS=Mus musculus OX=10090 GN=Wdr90 PE=1 SV=1	6.56	2	3	3	3	1	1892	204.8	6.65	0	3
High	Q6ZQ45	MKIAA0791 protein (Fragment) OS=Mus musculus OX=10090 GN=Nup155 PE=2 SV=1	6.518	3	3	3	3	1	1423	158.5	6.24	3.43	3
High	Q9D7S7	60S ribosomal protein L22-like 1 OS=Mus musculus OX=10090 GN=Rpl22l1 PE=1 SV=1	6.507	25	3	3	3	1	122	14.5	9.45	4.67	3
High	Q9CZ92	Centromere protein P OS=Mus musculus OX=10090 GN=Cenpp PE=2 SV=1	6.472	8	2	2	2	1	286	33.3	5.25	4.74	2
High	Q69Z61	PWWP domain-containing protein 2A OS=Mus musculus OX=10090 GN=Pwwp2a PE=2 SV=2	6.381	6	3	3	3	1	730	79.3	9.28	5.75	3
High	Q9JHS9	Spliceosome-associated protein CWC15 homolog OS=Mus musculus OX=10090 GN=Cwc15 PE=1 SV=1	6.379	9	2	2	2	1	229	26.6	5.71	5.09	2
High	Q9QZQ8	Core histone macro-H2A.1 OS=Mus musculus OX=10090 GN=Macroh2a1 PE=1 SV=3	6.368	14	3	3	3	1	372	39.7	9.8	2.3	3
High	Q9CQ82	Centromere protein R OS=Mus musculus OX=10090 GN=Itgb3bp PE=1 SV=1	6.366	13	2	2	2	1	176	20	9.82	2.26	2
High	Q91WD7	Kinesin-like protein KIF18A OS=Mus musculus OX=10090 GN=Kif18a PE=2 SV=1	6.319	5	3	4	3	1	886	100.9	9.04	5.88	3
High	Q3UFM6	Splicing factor ESS-2 homolog OS=Mus musculus OX=10090 GN=Ess2 PE=1 SV=1	6.282	5	2	3	2	1	480	52.6	6.7	2.36	2
High	Q4V9X1	Ribosome biogenesis protein WDR12 OS=Mus musculus OX=10090 GN=Wdr12 PE=1 SV=1	6.277	10	3	3	3	1	423	47.3	5.6	1.79	3
High	Q61409	cGMP-inhibited 3',5'-cyclic phosphodiesterase B OS=Mus musculus OX=10090 GN=Pde3b PE=1 SV=2	6.269	3	2	2	2	1	1100	122.1	5.71	3.86	2
High	Q9D8Y8	Inhibitor of growth protein 5 OS=Mus musculus OX=10090 GN=Ing5 PE=1 SV=1	6.216	12	2	2	1	1	240	27.8	7.64	2.79	2
High	Q8R149	BUD13 homolog OS=Mus musculus OX=10090 GN=Bud13 PE=1 SV=1	6.176	5	3	4	3	1	637	72.1	9.95	0	3
High	Q9CU62	Structural maintenance of chromosomes protein 1A OS=Mus musculus OX=10090 GN=Smc1a PE=1 SV=4	6.176	3	3	3	3	1	1233	143.1	7.64	4.18	3
High	Q9QYB2	Dachshund homolog 1 OS=Mus musculus OX=10090 GN=Dach1 PE=1 SV=1	6.148	4	3	3	2	1	751	77.9	8.53	4.06	3
High	Q9QXE7	F-box-like/WD repeat-containing protein TBL1X OS=Mus musculus OX=10090 GN=Tbl1x PE=1 SV=2	6.118	5	2	2	2	1	527	56.8	5.72	0	2
High	Q8BHX3-2	Isoform 2 of Borealin OS=Mus musculus OX=10090 GN=Cdca8	6.098	10	2	2	2	1	326	36.6	10.24	4.46	2
High	P97496	SWI/SNF complex subunit SMARCC1 OS=Mus musculus OX=10090 GN=Smarcc1 PE=1 SV=2	6.085	3	3	3	3	1	1104	122.8	5.73	0	3
High	P17012	Zinc finger X-chromosomal protein OS=Mus musculus OX=10090 GN=Zfx PE=1 SV=2	6.01	4	3	3	3	1	799	90	6.19	4.51	3
High	Q8BTV2	Cleavage and polyadenylation specificity factor subunit 7 OS=Mus musculus OX=10090 GN=Cpsf7 PE=1 SV=2	5.904	4	2	2	2	1	471	52	8	1.62	2
High	Q8R480	Nuclear pore complex protein Nup85 OS=Mus musculus OX=10090 GN=Nup85 PE=1 SV=1	5.881	4	2	2	2	1	656	74.7	5.57	2.32	2
High	A0A0R4J1S2	Pre-mRNA-processing factor 40 homolog B OS=Mus musculus OX=10090 GN=Prpf40b PE=1 SV=1	5.879	3	3	3	1	1	873	99.6	7.18	4.74	3
High	Q9Z0W3	Nuclear pore complex protein Nup160 OS=Mus musculus OX=10090 GN=Nup160 PE=1 SV=2	5.847	2	3	3	3	1	1402	158.1	5.52	2.27	3
High	Q8BIZ6	Smad nuclear-interacting protein 1 OS=Mus musculus OX=10090 GN=Snip1 PE=1 SV=1	5.829	10	3	3	3	1	383	44.4	9.89	2.19	3
High	Q80Y19	Rho GTPase-activating protein 11A OS=Mus musculus OX=10090 GN=Arhgap11a PE=1 SV=2	5.808	3	2	2	2	1	987	108.4	8.81	2.42	2
High	Q66JY2	INO80 complex subunit D OS=Mus musculus OX=10090 GN=Ino80d PE=2 SV=4	5.771	3	2	2	2	1	1021	112.3	7.78	1.98	2
High	Q91WR3-3	Isoform 3 of Activating signal cointegrator 1 complex subunit 2 OS=Mus musculus OX=10090 GN=Ascc2	5.742	4	2	2	2	1	769	87.7	4.93	4.77	2
High	Q9D4H9-2	Isoform 2 of PHD finger protein 14 OS=Mus musculus OX=10090 GN=Phf14	5.728	2	2	3	2	1	941	105.9	5.35	1.85	2
High	Q3U1T3	Breast cancer metastasis-suppressor 1-like protein OS=Mus musculus OX=10090 GN=Brms1l PE=2 SV=1	5.7	7	2	2	2	1	323	37.6	5.15	4.33	2
High	Q9ESC8	AF4/FMR2 family member 4 OS=Mus musculus OX=10090 GN=Aff4 PE=1 SV=1	5.694	2	3	3	2	1	1160	126.6	9.36	3.93	3
High	Q8BTU1	Cilia- and flagella-associated protein 20 OS=Mus musculus OX=10090 GN=Cfap20 PE=1 SV=1	5.681	12	2	2	2	1	193	22.7	9.76	2.64	2
High	Q9D1H9	Microfibril-associated glycoprotein 4 OS=Mus musculus OX=10090 GN=Mfap4 PE=1 SV=1	5.677	9	2	2	2	1	257	28.9	5.44	5.87	2
High	A2AP82	Transcription initiation factor TFIID subunit 9B OS=Mus musculus OX=10090 GN=Taf9b PE=1 SV=1	5.67	10	3	3	3	1	293	32	5.43	3.46	3
High	Q80YR9	RNA-binding protein 12B-A OS=Mus musculus OX=10090 GN=Rbm12b1 PE=1 SV=2	5.655	4	4	4	4	1	836	96.5	8.07	2.06	4
High	Q8BG13	RNA-binding protein 3 OS=Mus musculus OX=10090 GN=Rbm3 PE=1 SV=1	5.655	18	2	2	2	1	154	16.8	8.38	0	2
High	Q9CR47	Ribosome biogenesis protein NSA2 homolog OS=Mus musculus OX=10090 GN=Nsa2 PE=2 SV=1	5.586	11	3	3	3	1	260	30	10.24	2.77	3
High	Q925J9	Mediator of RNA polymerase II transcription subunit 1 OS=Mus musculus OX=10090 GN=Med1 PE=1 SV=2	5.585	3	3	3	3	1	1575	167	8.73	4.14	3
High	Q3U4S9	Coatomer subunit delta OS=Mus musculus OX=10090 GN=Arcn1 PE=2 SV=1	5.577	6	3	3	3	1	511	57.1	6.34	3.38	3
High	Q3U5N8	TRASH domain-containing protein OS=Mus musculus OX=10090 GN=Rsl24d1 PE=2 SV=1	5.571	18	2	2	2	1	171	20.7	11.15	4.3	2
High	Q3UPC8	Uncharacterized protein OS=Mus musculus OX=10090 GN=Zfp592 PE=2 SV=1	5.566	2	3	3	3	1	1262	137.4	7.96	1.92	3
High	Q8BHJ9	Pre-mRNA-splicing factor SLU7 OS=Mus musculus OX=10090 GN=Slu7 PE=1 SV=1	5.546	4	3	3	3	1	585	68	7.08	0	3
High	Q8R326	Paraspeckle component 1 OS=Mus musculus OX=10090 GN=Pspc1 PE=1 SV=1	5.521	4	2	2	2	1	523	58.7	6.67	1.77	2
High	A0A0R4J0P2	Non-specific serine/threonine protein kinase OS=Mus musculus OX=10090 GN=Haspin PE=1 SV=1	5.517	5	2	2	2	1	754	84.1	9.01	5.32	2
High	Q8K015	Centromere protein O OS=Mus musculus OX=10090 GN=Cenpo PE=2 SV=1	5.509	13	2	3	2	1	298	34.1	8.79	10.24	2
High	Q91WN1	DnaJ homolog subfamily C member 9 OS=Mus musculus OX=10090 GN=Dnajc9 PE=1 SV=2	5.478	8	2	2	2	1	259	30	5.94	2.88	2
High	Q8CD14	ATP-dependent RNA helicase DDX54 OS=Mus musculus OX=10090 GN=Ddx54 PE=2 SV=1	5.459	3	1	1	1	1	909	100.7	9.52	4.4	1
High	E0CXT7	Cleavage and polyadenylation specificity factor subunit 4 OS=Mus musculus OX=10090 GN=Cpsf4 PE=1 SV=1	5.398	9	2	2	2	1	269	30.2	8.31	3.54	2
High	Q8K1M3	Protein kinase, cAMP dependent regulatory, type II alpha OS=Mus musculus OX=10090 GN=Prkar2a PE=1 SV=1	5.398	6	2	2	2	1	402	45.6	4.93	2.64	2
High	P33174	Chromosome-associated kinesin KIF4 OS=Mus musculus OX=10090 GN=Kif4 PE=1 SV=3	5.392	2	2	2	2	1	1231	139.4	6.68	1.65	2
High	Q8K203	Endonuclease 8-like 3 OS=Mus musculus OX=10090 GN=Neil3 PE=1 SV=1	5.374	4	2	2	2	1	606	67.4	9.01	3.6	2
High	Q8K0H5	Transcription initiation factor TFIID subunit 10 OS=Mus musculus OX=10090 GN=Taf10 PE=1 SV=1	5.346	15	2	2	2	1	218	21.8	6.55	3.54	2
High	P63015-2	Isoform 5a of Paired box protein Pax-6 OS=Mus musculus OX=10090 GN=Pax6	5.276	6	2	2	2	1	436	48.2	9.14	1.76	2
High	Q8CHT3	Integrator complex subunit 5 OS=Mus musculus OX=10090 GN=Ints5 PE=2 SV=1	5.276	3	2	2	2	1	1018	108.3	7.06	2.7	2
High	Q9CYA6	Zinc finger CCHC domain-containing protein 8 OS=Mus musculus OX=10090 GN=Zcchc8 PE=1 SV=3	5.244	5	2	2	2	1	709	78	4.73	2.05	2
High	P09535-2	Isoform 2 of Insulin-like growth factor II OS=Mus musculus OX=10090 GN=Igf2	5.234	13	2	3	2	1	191	21	9.16	5.07	2
High	Q8BZX4-2	Isoform 2 of Splicing regulatory glutamine/lysine-rich protein 1 OS=Mus musculus OX=10090 GN=Srek1	5.23	4	2	2	2	1	610	69.1	10.27	2.38	2
High	Q3TF62	Uncharacterized protein OS=Mus musculus OX=10090 GN=Actl6a PE=2 SV=1	5.229	5	2	2	2	1	429	47.5	5.5	2.71	2
High	Q6NZJ6	Eukaryotic translation initiation factor 4 gamma 1 OS=Mus musculus OX=10090 GN=Eif4g1 PE=1 SV=1	5.228	2	2	2	2	1	1600	176	5.4	2.33	2
High	A0A0R4J0J8	Cytospin-A OS=Mus musculus OX=10090 GN=Specc1l PE=1 SV=1	5.226	2	2	2	2	1	1135	126.5	5.94	2.06	2
High	Q3UB74	Transforming growth factor beta regulator 1 OS=Mus musculus OX=10090 GN=Tbrg1 PE=1 SV=2	5.184	5	2	2	2	1	406	44.9	7.59	4.25	2
High	Q8BPZ8	BRCA1-A complex subunit Abraxas 1 OS=Mus musculus OX=10090 GN=Abraxas1 PE=1 SV=1	5.143	6	2	2	2	1	407	46	6.98	1.74	2
High	Q7TPD0	Integrator complex subunit 3 OS=Mus musculus OX=10090 GN=Ints3 PE=1 SV=2	5.104	4	3	3	3	1	1041	117.9	5.8	0	3
High	Q9ERR1	Nuclear distribution protein nudE-like 1 OS=Mus musculus OX=10090 GN=Ndel1 PE=1 SV=2	5.032	6	2	2	2	1	345	38.3	5.24	2.99	2
High	Q80TJ7	Histone lysine demethylase PHF8 OS=Mus musculus OX=10090 GN=Phf8 PE=1 SV=2	4.992	3	3	3	3	1	1023	113.5	8.44	0	3
High	Q9JIX0	Transcription and mRNA export factor ENY2 OS=Mus musculus OX=10090 GN=Eny2 PE=1 SV=1	4.973	24	2	2	2	1	101	11.5	9.33	3.54	2
High	Q9CQJ4	E3 ubiquitin-protein ligase RING2 OS=Mus musculus OX=10090 GN=Rnf2 PE=1 SV=1	4.945	7	2	2	2	1	336	37.6	6.84	0	2
High	Q6P5B5	Fragile X mental retardation syndrome-related protein 2 OS=Mus musculus OX=10090 GN=Fxr2 PE=1 SV=1	4.944	3	2	2	1	1	674	74.2	6.23	2.58	2
High	Q54AH9	Beta-2-globin (Fragment) OS=Mus musculus OX=10090 GN=Hbb-b2 PE=2 SV=1	4.941	12	2	3	1	1	146	15.7	8.05	4.06	2
High	D3YW42	Coiled-coil domain-containing protein 9 OS=Mus musculus OX=10090 GN=Ccdc9 PE=1 SV=2	4.928	3	2	2	2	1	589	65.9	4.94	3.05	2
High	A0A0R4J1I3	Menin OS=Mus musculus OX=10090 GN=Men1 PE=1 SV=1	4.887	4	2	2	2	1	617	68	6.39	3.81	2
High	Q8C0D7	Inhibitor of growth protein 4 OS=Mus musculus OX=10090 GN=Ing4 PE=1 SV=2	4.861	8	2	2	1	1	249	28.5	7.62	5.1	2
High	Q3UJY3	WD_REPEATS_REGION domain-containing protein OS=Mus musculus OX=10090 GN=Utp4 PE=2 SV=1	4.859	3	2	2	2	1	686	76.8	8.87	0	2
High	A2AJI0	MAP7 domain-containing protein 1 OS=Mus musculus OX=10090 GN=Map7d1 PE=1 SV=1	4.833	4	3	3	3	1	846	93.2	10.15	1.91	3
High	A0A1W2P7Q9	Myosin light polypeptide 6 OS=Mus musculus OX=10090 GN=Myl6 PE=1 SV=1	4.816	14	2	2	2	1	158	17.7	4.65	3.66	2
High	A8DUK2	Beta-globin OS=Mus musculus OX=10090 GN=Hbbt1 PE=3 SV=1	4.794	17	2	3	1	1	151	16.2	8.21	4.06	2
High	Q3UI43	BRISC and BRCA1-A complex member 1 OS=Mus musculus OX=10090 GN=Babam1 PE=1 SV=1	4.793	14	2	3	2	1	333	36.8	4.55	2.24	2
High	A2ASY1	TAF3 RNA polymerase II, TATA box binding protein (TBP)-associated factor OS=Mus musculus OX=10090 GN=Taf3 PE=2 SV=1	4.754	2	2	2	2	1	932	105	9.19	2.7	2
High	Q9D3V6	Core histone macro-H2A OS=Mus musculus OX=10090 GN=Macroh2a3 PE=2 SV=1	4.746	8	2	3	2	1	382	40.9	9.92	2.15	2
High	Q9QZH3	Peptidyl-prolyl cis-trans isomerase E OS=Mus musculus OX=10090 GN=Ppie PE=1 SV=2	4.744	7	2	2	2	1	301	33.4	5.6	4.82	2
High	P22518	Dual specificity protein kinase CLK1 OS=Mus musculus OX=10090 GN=Clk1 PE=1 SV=2	4.73	6	2	2	2	1	483	57.1	8.94	4.49	2
High	B9EJX5	Transcription initiation factor TFIID 150 kDa subunit OS=Mus musculus OX=10090 GN=Taf2 PE=1 SV=1	4.693	2	2	2	2	1	1198	136.8	8.07	0	2
High	Q8BK66	RNA helicase OS=Mus musculus OX=10090 GN=Ddx56 PE=2 SV=1	4.667	5	2	2	2	1	546	61.1	9.25	2.68	2
High	Q3UK38	rRNA adenine N(6)-methyltransferase OS=Mus musculus OX=10090 GN=Dimt1 PE=2 SV=1	4.624	8	2	2	2	1	313	35.2	10.05	1.72	2
High	Q9CQT2	RNA-binding protein 7 OS=Mus musculus OX=10090 GN=Rbm7 PE=1 SV=1	4.585	9	2	2	2	1	265	30.1	9.38	2.71	2
High	Q60900	ELAV-like protein 3 OS=Mus musculus OX=10090 GN=Elavl3 PE=1 SV=1	4.584	6	2	2	1	1	367	39.5	9.28	1.89	2
High	O35901	G7b alternative form OS=Mus musculus OX=10090 GN=Lsm2 PE=1 SV=1	4.569	15	1	1	1	1	131	14.8	7.34	3.75	1
High	E9Q9M8	PWWP domain-containing 2B OS=Mus musculus OX=10090 GN=Pwwp2b PE=4 SV=1	4.559	4	2	2	2	1	600	65.4	8.32	0	2
High	A0A0R4J0B7	Protein SDA1 OS=Mus musculus OX=10090 GN=Sdad1 PE=1 SV=1	4.546	3	2	2	2	1	687	79.5	9.2	2.19	2
High	Q99LL5	Periodic tryptophan protein 1 homolog OS=Mus musculus OX=10090 GN=Pwp1 PE=1 SV=1	4.538	6	2	2	2	1	501	55.6	4.82	2.85	2
High	G3X959	Periphilin-1 OS=Mus musculus OX=10090 GN=Pphln1 PE=1 SV=1	4.508	6	2	2	2	1	381	43.8	8.35	0	2
High	Q3UQF7	Uncharacterized protein (Fragment) OS=Mus musculus OX=10090 GN=Fam111a PE=2 SV=1	4.502	3	2	2	2	1	632	71.9	7.78	1.83	2
High	Q80WV7	Serine/arginine repetitive matrix protein 3 OS=Mus musculus OX=10090 GN=Srrm3 PE=2 SV=1	4.5	3	2	2	2	1	648	71.1	11.55	2.34	2
High	Q571G2	Ribosomal RNA-processing protein 43 (Fragment) OS=Mus musculus OX=10090 GN=Exosc8 PE=2 SV=1	4.497	6	2	2	2	1	308	33.2	5.58	2.49	2
High	Q2VPQ9-2	Isoform 2 of Chromatin modification-related protein MEAF6 OS=Mus musculus OX=10090 GN=Meaf6	4.49	15	2	2	2	1	192	21.7	9.09	1.86	2
High	A0A0R4J073	BRCA1-A complex subunit RAP80 OS=Mus musculus OX=10090 GN=Uimc1 PE=1 SV=1	4.489	3	2	2	2	1	727	81.4	6.51	2.22	2
High	Q549X6	Synaptotagmin-like protein 4-a OS=Mus musculus OX=10090 GN=Sytl4 PE=2 SV=1	4.478	3	2	2	2	1	673	76	8.84	2.86	2
High	Q62504	Msx2-interacting protein OS=Mus musculus OX=10090 GN=Spen PE=1 SV=2	4.262	1	2	2	2	1	3644	398.5	8.54	0	2
High	Q3V117	ATP-citrate synthase OS=Mus musculus OX=10090 GN=Acly PE=1 SV=1	4.252	2	2	2	2	1	1101	120.7	7.44	0	2
High	P62827	GTP-binding nuclear protein Ran OS=Mus musculus OX=10090 GN=Ran PE=1 SV=3	4.235	11	2	2	2	1	216	24.4	7.49	2.27	2
High	Q3UJV0	ASCH domain-containing protein OS=Mus musculus OX=10090 GN=Trip4 PE=2 SV=1	4.225	3	2	2	2	1	581	66.2	7.56	1.6	2
High	Q9QXS1	Plectin OS=Mus musculus OX=10090 GN=Plec PE=1 SV=3	4.21	1	2	2	2	1	4691	533.9	5.96	1.63	2
High	Q3TFE2	Nsp1_C domain-containing protein OS=Mus musculus OX=10090 GN=Nup62 PE=2 SV=1	4.192	7	2	2	2	1	526	53.2	5.31	0	2
High	Q8K3W3	Protein CASC3 OS=Mus musculus OX=10090 GN=Casc3 PE=1 SV=3	4.182	2	1	1	1	1	698	75.7	6.44	0	1
High	Q3UYQ4	Uncharacterized protein OS=Mus musculus OX=10090 GN=Api5 PE=2 SV=1	4.172	5	2	2	2	1	524	59	7.34	1.72	2
High	D3Z3N4	Heterogeneous nuclear ribonucleoprotein H3 OS=Mus musculus OX=10090 GN=Hnrnph3 PE=1 SV=1	4.072	6	2	4	1	1	346	36.8	6.87	0	2
High	Q8VCG3	WD repeat-containing protein 74 OS=Mus musculus OX=10090 GN=Wdr74 PE=2 SV=1	4.058	5	2	2	2	1	384	42.6	7.78	0	2
High	N0E634	Casein kinase II subunit beta (Fragment) OS=Mus musculus OX=10090 GN=Csnk2b PE=2 SV=1	4.007	41	1	1	1	1	39	4.6	4.01	2.63	1
High	P46737	Lys-63-specific deubiquitinase BRCC36 OS=Mus musculus OX=10090 GN=Brcc3 PE=1 SV=1	4.007	8	2	2	2	1	291	33.3	5.83	2.01	2
High	Q80X50-5	Isoform 5 of Ubiquitin-associated protein 2-like OS=Mus musculus OX=10090 GN=Ubap2l	3.963	2	2	2	2	1	1112	117.3	7.12	0	2
High	Q80VY9	ATP-dependent RNA helicase DHX33 OS=Mus musculus OX=10090 GN=Dhx33 PE=1 SV=1	3.94	3	2	2	2	1	698	78.3	8.94	0	2
High	Q9WUP7	Ubiquitin carboxyl-terminal hydrolase isozyme L5 OS=Mus musculus OX=10090 GN=Uchl5 PE=1 SV=2	3.896	5	2	2	2	1	329	37.6	5.33	0	2
High	Q8C852	Uncharacterized protein OS=Mus musculus OX=10090 GN=Dcx PE=2 SV=1	3.888	9	2	2	2	1	379	42.5	9.72	1.8	2
High	Q9D198	Pre-mRNA-splicing factor SYF2 OS=Mus musculus OX=10090 GN=Syf2 PE=2 SV=1	3.886	11	2	2	2	1	242	28.7	8.66	1.61	2
High	Q923G2	DNA-directed RNA polymerases I, II, and III subunit RPABC3 OS=Mus musculus OX=10090 GN=Polr2h PE=1 SV=3	3.875	9	1	1	1	1	150	17.1	4.68	2.63	1
High	J3QN94	Tripartite motif-containing protein 26 OS=Mus musculus OX=10090 GN=Trim26 PE=1 SV=1	3.868	4	2	2	2	1	545	62.7	5.07	1.97	2
High	Q8CDZ5	Nucleoporin_C domain-containing protein OS=Mus musculus OX=10090 GN=Nup133 PE=2 SV=1	3.866	3	2	2	2	1	1155	128.5	5.17	1.77	2
High	E9Q947	Nucleolar protein 4 OS=Mus musculus OX=10090 GN=Nol4 PE=1 SV=1	3.857	3	2	2	2	1	637	70.9	5.47	0	2
High	E9QMN5	Transcriptional repressor p66 alpha OS=Mus musculus OX=10090 GN=Gatad2a PE=1 SV=1	3.843	4	2	2	2	1	630	67.4	9.89	1.7	2
High	A0A075B5L7	Immunoglobulin kappa variable 4-80 (Fragment) OS=Mus musculus OX=10090 GN=Igkv4-80 PE=4 SV=2	3.827	14	1	2	1	1	116	12.6	5.15	2.48	1
High	Q8K194-2	Isoform 2 of U4/U6.U5 small nuclear ribonucleoprotein 27 kDa protein OS=Mus musculus OX=10090 GN=Snrnp27	3.773	6	1	1	1	1	191	22.7	11.09	2.75	1
High	Q9CQS2	H/ACA ribonucleoprotein complex subunit 3 OS=Mus musculus OX=10090 GN=Nop10 PE=3 SV=1	3.762	23	1	1	1	1	64	7.7	9.99	2.9	1
High	P11370	Retrovirus-related Env polyprotein from Fv-4 locus OS=Mus musculus OX=10090 GN=Fv4 PE=1 SV=2	3.756	2	1	1	1	1	679	74.4	7.81	3.26	1
High	Q9R0L7	A-kinase anchor protein 8-like OS=Mus musculus OX=10090 GN=Akap8l PE=1 SV=1	3.754	3	2	2	2	1	642	71.4	5.05	1.88	2
High	Q99J95	Cyclin-dependent kinase 9 OS=Mus musculus OX=10090 GN=Cdk9 PE=1 SV=1	3.727	6	2	2	1	1	372	42.7	8.79	2.14	2
High	E9QK83	Small subunit processome component 20 homolog OS=Mus musculus OX=10090 GN=Utp20 PE=1 SV=1	3.71	1	2	2	2	1	2789	317.7	8.09	0	2
High	Q8VHZ7	U3 small nucleolar ribonucleoprotein protein IMP4 OS=Mus musculus OX=10090 GN=Imp4 PE=2 SV=1	3.708	5	1	2	1	1	291	33.6	9.32	2.45	1
High	Q91V81	RNA-binding protein 42 OS=Mus musculus OX=10090 GN=Rbm42 PE=1 SV=2	3.686	4	1	1	1	1	478	50.2	9.63	2.05	1
High	Q5EEX1	Insulin OS=Mus musculus OX=10090 GN=Ins2 PE=1 SV=1	3.664	17	1	1	1	1	110	12.4	5.33	4.14	1
High	E9QNT5	Transcription initiation factor TFIID subunit 12 OS=Mus musculus OX=10090 GN=Taf12 PE=1 SV=1	3.646	9	2	2	2	1	213	23.5	8.66	1.99	2
High	Q3TL58	S-phase kinase-associated protein 1 OS=Mus musculus OX=10090 GN=Skp1 PE=2 SV=1	3.635	7	1	1	1	1	163	18.7	4.58	2.23	1
High	Q3U1J4	DNA damage-binding protein 1 OS=Mus musculus OX=10090 GN=Ddb1 PE=1 SV=2	3.631	2	1	1	1	1	1140	126.8	5.26	0	1
High	A0A0R4J175	Bromodomain-containing protein 9 OS=Mus musculus OX=10090 GN=Brd9 PE=1 SV=1	3.622	7	2	2	2	1	597	66.9	6.27	0	2
High	Q9CY46	U6 snRNA-associated Sm-like protein LSm4 OS=Mus musculus OX=10090 GN=Lsm4 PE=1 SV=1	3.594	7	1	2	1	1	138	15.2	10.05	4.85	1
High	Q505A8	Ribosomal protein L39 OS=Mus musculus OX=10090 GN=Rpl39 PE=1 SV=1	3.584	20	1	1	1	1	51	6.4	12.56	3.52	1
High	Q9CPW7	Zinc finger matrin-type protein 2 OS=Mus musculus OX=10090 GN=Zmat2 PE=2 SV=1	3.562	6	1	1	1	1	199	23.6	9.01	2.39	1
High	Q04187	Large T antigen OS=Mus musculus OX=10090 GN=L factor type I (LF1) PE=4 SV=1	3.562	3	1	1	1	1	782	87.5	6.84	2.55	1
High	P60060	Protein transport protein Sec61 subunit gamma OS=Mus musculus OX=10090 GN=Sec61g PE=3 SV=1	3.54	18	1	1	1	1	68	7.7	9.99	2.92	1
High	Q8BTW3	Exosome complex component MTR3 OS=Mus musculus OX=10090 GN=Exosc6 PE=1 SV=1	3.494	5	1	1	1	1	273	28.4	6.11	2.78	1
High	Q8K298	Anillin OS=Mus musculus OX=10090 GN=Anln PE=1 SV=2	3.484	1	1	2	1	1	1121	122.7	6.98	3.68	1
High	Q3ULS2	Structural maintenance of chromosomes protein OS=Mus musculus OX=10090 GN=Smc2 PE=2 SV=1	3.461	2	2	2	2	1	1233	139.2	8.4	0	2
High	N0E463	Casein kinase II subunit beta OS=Mus musculus OX=10090 GN=Csnk2b-Ly6g5b PE=2 SV=1	3.46	7	2	2	2	1	227	26.4	5.97	3.74	2
High	P97452	Ribosome biogenesis protein BOP1 OS=Mus musculus OX=10090 GN=Bop1 PE=1 SV=1	3.448	3	1	1	1	1	732	82.5	6.28	2.59	1
High	Q9R1C0	Transcription initiation factor TFIID subunit 7 OS=Mus musculus OX=10090 GN=Taf7 PE=1 SV=1	3.442	6	2	2	2	1	341	39.1	5.33	0	2
High	Q8BJ90	Zinc finger protein 771 OS=Mus musculus OX=10090 GN=Znf771 PE=2 SV=1	3.427	4	1	1	1	1	317	35.7	8.82	2.58	1
High	H3BJW3	Cleavage and polyadenylation specificity factor subunit 6 OS=Mus musculus OX=10090 GN=Cpsf6 PE=1 SV=1	3.42	2	1	1	1	1	588	63.4	7.71	2.44	1
High	Q8R2M2	Deoxynucleotidyltransferase terminal-interacting protein 2 OS=Mus musculus OX=10090 GN=Dnttip2 PE=1 SV=1	3.419	4	2	2	2	1	758	84.2	6.44	2.47	2
High	E9PW43	Predicted pseudogene 10320 OS=Mus musculus OX=10090 GN=Gm10320 PE=3 SV=1	3.415	19	2	2	2	1	113	11.8	11.58	3.52	2
High	Q61686	Chromobox protein homolog 5 OS=Mus musculus OX=10090 GN=Cbx5 PE=1 SV=1	3.347	9	2	2	2	1	191	22.2	5.86	4.73	2
High	P60824	Cold-inducible RNA-binding protein OS=Mus musculus OX=10090 GN=Cirbp PE=1 SV=1	3.321	8	1	1	1	1	172	18.6	9.61	1.98	1
High	Q569X8	Nuclear pore complex protein OS=Mus musculus OX=10090 GN=Nup107 PE=2 SV=1	3.321	1	1	1	1	1	926	106.6	5.43	2.16	1
High	Q8BU00	Zinc finger protein Pegasus OS=Mus musculus OX=10090 GN=Ikzf5 PE=2 SV=1	3.314	2	1	1	1	1	419	46.4	7.21	0	1
High	Q80X82	Symplekin OS=Mus musculus OX=10090 GN=Sympk PE=1 SV=2	3.29	1	1	1	1	1	1288	142.5	6.05	2.54	1
High	Q8BK35	Ribosome biogenesis protein NOP53 OS=Mus musculus OX=10090 GN=Nop53 PE=1 SV=1	3.271	5	2	2	2	1	484	55.8	10.35	0	2
High	A0A0E4B366	MAb 44B1 heavy chain OS=Mus musculus OX=10090 GN=HC PE=2 SV=1	3.267	1	1	3	1	1	472	51.8	8.35	5.41	1
High	A0A5F8MQ39	Histone acetyltransferase OS=Mus musculus OX=10090 GN=Kat6b PE=1 SV=1	3.252	1	2	2	2	1	2054	228.2	6.7	0	2
High	P83877	Thioredoxin-like protein 4A OS=Mus musculus OX=10090 GN=Txnl4a PE=1 SV=1	3.243	8	1	1	1	1	142	16.8	5.85	2.9	1
High	A0A0U1RNL9	Myc-associated zinc finger protein OS=Mus musculus OX=10090 GN=Maz PE=1 SV=1	3.221	3	2	2	1	1	493	51.2	9.1	1.91	2
High	E9PZ97	DNA helicase OS=Mus musculus OX=10090 GN=Blm PE=1 SV=1	3.204	1	1	1	1	1	1419	158.7	7.33	1.97	1
High	Q6RUT5	T-complex expressed 7 OS=Mus musculus OX=10090 GN=Tce7 PE=4 SV=1	3.195	3	1	1	1	1	341	37.6	7.03	2.06	1
High	P61620	Protein transport protein Sec61 subunit alpha isoform 1 OS=Mus musculus OX=10090 GN=Sec61a1 PE=1 SV=2	3.171	4	2	2	2	1	476	52.2	8.06	1.65	2
High	B1AQJ2	Ubiquitin carboxyl-terminal hydrolase 36 OS=Mus musculus OX=10090 GN=Usp36 PE=1 SV=1	3.164	2	2	3	2	1	1098	119.8	9.82	0	2
High	Q91ZJ0	Crossover junction endonuclease MUS81 OS=Mus musculus OX=10090 GN=Mus81 PE=1 SV=2	3.149	3	1	1	1	1	551	61.5	9.41	2.4	1
High	Q3TZF3	Uncharacterized protein OS=Mus musculus OX=10090 GN=Otoa PE=2 SV=1	3.103	3	1	6	1	1	1137	126.3	5.72	0	1
High	Q6R0H7	Guanine nucleotide-binding protein G(s) subunit alpha isoforms XLas OS=Mus musculus OX=10090 GN=Gnas PE=1 SV=1	3.06	1	1	1	1	1	1133	121.4	4.81	1.92	1
High	Q8BGT7	Survival of motor neuron-related-splicing factor 30 OS=Mus musculus OX=10090 GN=Smndc1 PE=1 SV=1	3.05	4	1	1	1	1	238	26.7	7.24	1.69	1
High	A0A0R4J0B4	CMP-N-acetylneuraminic acid synthase OS=Mus musculus OX=10090 GN=Cmas PE=1 SV=1	3.042	6	2	2	2	1	432	48	8.1	1.94	2
High	F6ZDS4	Nucleoprotein TPR OS=Mus musculus OX=10090 GN=Tpr PE=1 SV=1	3.028	0	1	1	1	1	2431	273.8	5.03	2.48	1
High	A0A097PUH2	Anti-dectin-1 15E2 heavy chain OS=Mus musculus OX=10090 PE=2 SV=1	3.028	1	1	3	1	1	469	51.6	7.94	5.61	1
High	Q3TUU0	Uncharacterized protein OS=Mus musculus OX=10090 GN=Caap1 PE=2 SV=1	3.027	4	1	1	1	1	356	37.8	4.68	2.36	1
High	Q3U6B1	Uncharacterized protein (Fragment) OS=Mus musculus OX=10090 GN=G3bp2 PE=2 SV=1	2.983	2	1	1	1	1	550	61	5.87	0	1
High	Q3TXT3	SOSS complex subunit C OS=Mus musculus OX=10090 GN=Inip PE=3 SV=1	2.967	13	1	1	1	1	104	11.4	9.25	3.22	1
High	Q6SJ95	TATA box-binding protein-like 2 OS=Mus musculus OX=10090 GN=Tbpl2 PE=1 SV=1	2.962	3	1	1	1	1	350	38.9	6.11	2.07	1
High	Q8BG17	Nucleolar protein 12 OS=Mus musculus OX=10090 GN=Nol12 PE=1 SV=1	2.944	4	1	1	1	1	217	25.3	10.13	1.78	1
High	P16254	Signal recognition particle 14 kDa protein OS=Mus musculus OX=10090 GN=Srp14 PE=1 SV=1	2.934	9	1	1	1	1	110	12.5	10.17	2.12	1
High	D3YWN7	Ensconsin OS=Mus musculus OX=10090 GN=Map7 PE=1 SV=2	2.885	1	1	1	1	1	738	82.8	9.38	2.51	1
High	Q9D7W5	Mediator of RNA polymerase II transcription subunit 8 OS=Mus musculus OX=10090 GN=Med8 PE=1 SV=1	2.879	5	1	1	1	1	268	29.2	6.95	2.64	1
High	P62313	U6 snRNA-associated Sm-like protein LSm6 OS=Mus musculus OX=10090 GN=Lsm6 PE=1 SV=1	2.877	14	1	1	1	1	80	9.1	9.58	2.22	1
High	P11440	Cyclin-dependent kinase 1 OS=Mus musculus OX=10090 GN=Cdk1 PE=1 SV=3	2.871	6	2	2	1	1	297	34.1	8.43	4.32	2
High	Q5SWD9	Pre-rRNA-processing protein TSR1 homolog OS=Mus musculus OX=10090 GN=Tsr1 PE=1 SV=1	2.869	1	1	1	1	1	803	92	6.99	0	1
High	Q9DB40	Mediator of RNA polymerase II transcription subunit 27 OS=Mus musculus OX=10090 GN=Med27 PE=2 SV=2	2.858	5	1	2	1	1	311	35.3	9.31	0	1
High	Q3UKX3	Uncharacterized protein (Fragment) OS=Mus musculus OX=10090 GN=Stau1 PE=2 SV=1	2.835	2	1	1	1	1	592	65.1	9.83	0	1
High	B1AWL2	Zinc finger protein 462 OS=Mus musculus OX=10090 GN=Znf462 PE=1 SV=1	2.812	0	1	1	1	1	2495	282.5	7.33	2.18	1
High	Q3UC65	Arginine/serine-rich protein 1 OS=Mus musculus OX=10090 GN=Rsrp1 PE=1 SV=1	2.793	5	1	1	1	1	298	34.5	11.77	1.67	1
High	P62876	DNA-directed RNA polymerases I, II, and III subunit RPABC5 OS=Mus musculus OX=10090 GN=Polr2l PE=3 SV=1	2.788	13	1	1	1	1	67	7.6	7.77	0	1
High	Q03517	Secretogranin-2 OS=Mus musculus OX=10090 GN=Scg2 PE=1 SV=1	2.784	2	1	1	1	1	617	70.6	4.75	0	1
High	A0A3B2WCR6	U1 small nuclear ribonucleoprotein C OS=Mus musculus OX=10090 GN=Snrpc PE=1 SV=1	2.779	5	1	1	1	1	182	19.7	9.67	1.92	1
High	Q9CRA8	Exosome complex component RRP46 OS=Mus musculus OX=10090 GN=Exosc5 PE=1 SV=1	2.767	6	1	1	1	1	235	25.2	7.56	1.9	1
High	Q9DC33-2	Isoform 2 of High mobility group protein 20A OS=Mus musculus OX=10090 GN=Hmg20a	2.743	2	1	1	1	1	379	43.3	8.91	0	1
High	Q8C0D9	Centrosomal protein of 68 kDa OS=Mus musculus OX=10090 GN=Cep68 PE=1 SV=2	2.729	3	2	2	2	1	733	78.7	5.48	0	2
High	Q6P1D7	Structure-specific endonuclease subunit SLX4 OS=Mus musculus OX=10090 GN=Slx4 PE=1 SV=1	2.716	1	1	2	1	1	1565	172.3	5.5	0	1
High	Q8CJ76	Leukemia-associated protein MLLT1 OS=Mus musculus OX=10090 GN=Mllt1 PE=4 SV=1	2.709	2	1	1	1	1	547	60.9	8.78	0	1
High	Q9CX11	rRNA-processing protein UTP23 homolog OS=Mus musculus OX=10090 GN=Utp23 PE=2 SV=1	2.708	5	1	1	1	1	249	28.4	10.32	0	1
High	A0A5F8MPF0	Kinesin-like protein KIF1B OS=Mus musculus OX=10090 GN=Kif1b PE=1 SV=1	2.686	1	1	1	1	1	1883	211.5	5.64	0	1
High	Q8R2U0	Nucleoporin SEH1 OS=Mus musculus OX=10090 GN=Seh1l PE=2 SV=1	2.681	4	1	1	1	1	360	39.7	8.05	0	1
High	B9EKC5	Calcineurin binding protein 1 OS=Mus musculus OX=10090 GN=Cabin1 PE=2 SV=1	2.655	1	2	2	2	1	2187	243.1	6.01	0	2
High	Q8BTT6	U3 small nucleolar RNA-associated protein 25 homolog OS=Mus musculus OX=10090 GN=Utp25 PE=1 SV=2	2.655	1	1	1	1	1	772	88.8	5.74	2.51	1
High	A0A0R4IZZ6	Formin-binding protein 4 OS=Mus musculus OX=10090 GN=Fnbp4 PE=1 SV=1	2.644	1	1	1	1	1	1077	116.2	4.83	1.77	1
High	A0A286YCG8	Signal sequence receptor subunit alpha OS=Mus musculus OX=10090 GN=Ssr1 PE=1 SV=1	2.62	3	1	1	1	1	318	35.5	4.44	1.63	1
High	Q921I9	Exosome complex component RRP41 OS=Mus musculus OX=10090 GN=Exosc4 PE=1 SV=3	2.615	7	1	1	1	1	245	26.2	6.15	2.15	1
High	P62274	40S ribosomal protein S29 OS=Mus musculus OX=10090 GN=Rps29 PE=1 SV=2	2.614	13	1	2	1	1	56	6.7	10.13	1.94	1
High	Q9D0R8	Protein LSM12 homolog OS=Mus musculus OX=10090 GN=Lsm12 PE=1 SV=1	2.612	5	1	1	1	1	195	21.7	7.74	1.86	1
High	Q8K3A9	7SK snRNA methylphosphate capping enzyme OS=Mus musculus OX=10090 GN=Mepce PE=1 SV=2	2.607	2	1	1	1	1	666	72	9.25	0	1
High	Q80WC1-4	Isoform 4 of Ubinuclein-2 OS=Mus musculus OX=10090 GN=Ubn2	2.597	2	2	2	2	1	1316	141.8	9.17	1.83	2
High	A0A140T8R5	Protein Jade-3 OS=Mus musculus OX=10090 GN=Jade3 PE=1 SV=1	2.588	2	2	2	2	1	824	93.5	7.02	0	2
High	A0A087WR34	Predicted gene, 20379 (Fragment) OS=Mus musculus OX=10090 GN=Gm20379 PE=3 SV=1	2.58	10	1	1	1	1	119	12.8	10.37	0	1
High	Q8QZV7	Integrator complex subunit 13 OS=Mus musculus OX=10090 GN=IntS13 PE=1 SV=2	2.566	1	1	1	1	1	732	82.7	6.92	0	1
High	Q6PAC3	DDB1- and CUL4-associated factor 13 OS=Mus musculus OX=10090 GN=Dcaf13 PE=2 SV=2	2.492	2	1	1	1	1	445	51.4	9.32	0	1
High	Q9CQA5	Mediator of RNA polymerase II transcription subunit 4 OS=Mus musculus OX=10090 GN=Med4 PE=2 SV=1	2.49	4	1	1	1	1	270	29.8	5.05	1.68	1
High	Q8CF90	Transcription factor MafA OS=Mus musculus OX=10090 GN=Mafa PE=1 SV=1	2.489	4	1	1	1	1	359	37.6	7.84	0	1
High	Q6PCM2	Integrator complex subunit 6 OS=Mus musculus OX=10090 GN=Ints6 PE=1 SV=1	2.437	2	2	2	2	1	883	99.6	8.78	0	2
High	A2ANY6	Midasin OS=Mus musculus OX=10090 GN=Mdn1 PE=1 SV=1	2.408	0	2	2	2	1	5589	629.9	5.72	1.6	2
High	Q9D8N0	Elongation factor 1-gamma OS=Mus musculus OX=10090 GN=Eef1g PE=1 SV=3	2.364	4	2	2	2	1	437	50	6.74	0	2
High	Q793C9	U2 small nuclear ribonucleoprotein auxiliary factor (U2AF) related protein OS=Mus musculus OX=10090 GN=Zrsr1 PE=1 SV=1	2.363	4	2	2	2	1	428	51.3	8.97	0	2
High	Q62261	Spectrin beta chain, non-erythrocytic 1 OS=Mus musculus OX=10090 GN=Sptbn1 PE=1 SV=2	2.357	0	1	1	1	1	2363	274.1	5.58	1.71	1
High	G3UWX1	Replication factor C subunit 1 OS=Mus musculus OX=10090 GN=Rfc1 PE=1 SV=2	2.354	1	1	1	1	1	1145	127.5	9.31	0	1
High	Q6NSS3	Tripartite motif-containing 27 (Fragment) OS=Mus musculus OX=10090 GN=Trim27 PE=2 SV=1	2.352	2	1	1	1	1	604	67.7	6.93	0	1
High	Q9WV85	Nucleoside diphosphate kinase 3 OS=Mus musculus OX=10090 GN=Nme3 PE=1 SV=3	2.336	7	1	1	1	1	169	19.1	6.68	0	1
High	Q8CFC7	CLK4-associating serine/arginine rich protein OS=Mus musculus OX=10090 GN=Clasrp PE=1 SV=3	2.292	2	1	1	1	1	668	76.8	10.36	2.74	1
High	Q9CTH6	rRNA-processing protein FCF1 homolog OS=Mus musculus OX=10090 GN=Fcf1 PE=2 SV=2	2.289	6	1	1	1	1	198	23.3	9.67	0	1
High	P54823	Probable ATP-dependent RNA helicase DDX6 OS=Mus musculus OX=10090 GN=Ddx6 PE=1 SV=1	2.271	4	1	1	1	1	483	54.2	8.66	2.14	1
High	F8VPQ2	AT-rich interactive domain-containing protein 4A OS=Mus musculus OX=10090 GN=Arid4a PE=1 SV=1	2.266	1	1	1	1	1	1261	142	5.07	0	1
High	Q6ZQG1	MKIAA0225 protein (Fragment) OS=Mus musculus OX=10090 GN=Nup205 PE=2 SV=1	2.253	0	1	1	1	1	2067	233.7	6.6	0	1
High	Q810A7	ATP-dependent RNA helicase DDX42 OS=Mus musculus OX=10090 GN=Ddx42 PE=1 SV=3	2.216	1	1	1	1	1	929	101.9	6.98	0	1
High	Q3UIK3	Signal recognition particle 9 kDa protein OS=Mus musculus OX=10090 GN=Srp9 PE=2 SV=1	2.194	10	1	1	1	1	86	10.2	8	0	1
High	Q3UKW2	Uncharacterized protein OS=Mus musculus OX=10090 PE=1 SV=1	2.181	5	1	1	1	1	197	21.5	4.35	0	1
High	Q3TYU7	FHA domain-containing protein OS=Mus musculus OX=10090 GN=Mcrs1 PE=2 SV=1	2.175	3	1	1	1	1	462	51.6	9.32	1.78	1
High	P01027	Complement C3 OS=Mus musculus OX=10090 GN=C3 PE=1 SV=3	2.174	1	1	1	1	1	1663	186.4	6.73	0	1
High	Q9D1M0	Protein SEC13 homolog OS=Mus musculus OX=10090 GN=Sec13 PE=1 SV=3	2.17	3	1	1	1	1	322	35.5	5.38	2.06	1
High	Q9CQQ8	U6 snRNA-associated Sm-like protein LSm7 OS=Mus musculus OX=10090 GN=Lsm7 PE=1 SV=1	2.151	8	1	1	1	1	103	11.6	5.27	1.75	1
High	Q3U3M5	Cyclin-K OS=Mus musculus OX=10090 GN=Ccnk PE=1 SV=1	2.15	2	1	1	1	1	582	64.3	8.41	0	1
High	Q9CW03	Structural maintenance of chromosomes protein 3 OS=Mus musculus OX=10090 GN=Smc3 PE=1 SV=2	2.143	1	1	1	1	1	1217	141.5	7.18	0	1
High	Q80Y44	Probable ATP-dependent RNA helicase DDX10 OS=Mus musculus OX=10090 GN=Ddx10 PE=1 SV=2	2.138	1	1	1	1	1	875	100.7	7.75	0	1
High	A0A3B0INZ4	Adiponectin b OS=Mus musculus OX=10090 GN=Adib PE=4 SV=1	2.134	4	1	1	1	1	276	29.3	8.69	0	1
High	Q3TT48	P/Homo B domain-containing protein (Fragment) OS=Mus musculus OX=10090 GN=Pcsk2 PE=2 SV=1	2.108	2	1	1	1	1	736	81.8	7.81	0	1
High	Q925S1	MRP5 (Fragment) OS=Mus musculus OX=10090 GN=Ighv9-4 PE=2 SV=1	2.095	4	1	1	1	1	218	23	8.78	0	1
High	E9QK89	Mediator of DNA damage checkpoint protein 1 OS=Mus musculus OX=10090 GN=Mdc1 PE=1 SV=1	2.087	1	1	1	1	1	1708	184.7	5.17	4.07	1
High	Q9QXS6	Drebrin OS=Mus musculus OX=10090 GN=Dbn1 PE=1 SV=4	2.079	3	1	1	1	1	706	77.2	4.49	2.12	1
High	D3Z7P0	BRISC and BRCA1-A complex member 2 OS=Mus musculus OX=10090 GN=Babam2 PE=1 SV=3	2.068	3	1	1	1	1	385	43.7	6.19	0	1
High	Q60865	Caprin-1 OS=Mus musculus OX=10090 GN=Caprin1 PE=1 SV=2	2.065	2	1	2	1	1	707	78.1	5.25	3.88	1
High	A0A0U1RP99	INO80 complex subunit E (Fragment) OS=Mus musculus OX=10090 GN=Ino80e PE=1 SV=1	2.043	3	1	1	1	1	260	28.4	9.55	1.73	1
High	Q5SQF8	Histone deacetylase complex subunit SAP30L OS=Mus musculus OX=10090 GN=Sap30l PE=1 SV=1	2.034	5	1	1	1	1	182	20.7	9.48	0	1
High	P59999	Actin-related protein 2/3 complex subunit 4 OS=Mus musculus OX=10090 GN=Arpc4 PE=1 SV=3	1.982	5	1	1	1	1	168	19.7	8.43	1.84	1
High	J3QNK5	Histone deacetylase complex subunit SAP130 OS=Mus musculus OX=10090 GN=Sap130 PE=1 SV=1	1.968	1	1	1	1	1	1057	111.2	9.95	0	1
High	Q7TMY4	THO complex subunit 7 homolog OS=Mus musculus OX=10090 GN=Thoc7 PE=1 SV=2	1.955	5	1	1	1	1	204	23.7	5.67	1.7	1
High	Q8VCD5	Mediator of RNA polymerase II transcription subunit 17 OS=Mus musculus OX=10090 GN=Med17 PE=1 SV=1	1.947	1	1	1	1	1	649	72.4	7.3	0	1
High	B2RY30	Exosome complex component RRP45 OS=Mus musculus OX=10090 GN=Exosc9 PE=2 SV=1	1.941	2	1	1	1	1	438	48.9	5.15	0	1
High	Q9JKR6	Hypoxia up-regulated protein 1 OS=Mus musculus OX=10090 GN=Hyou1 PE=1 SV=1	1.941	1	1	1	1	1	999	111.1	5.19	0	1
High	Q4G0F8-3	Isoform 3 of Ubinuclein-1 OS=Mus musculus OX=10090 GN=Ubn1	1.934	1	1	1	1	1	1142	123.3	9.19	0	1
High	Q8K2R5	Zinc finger protein 668 OS=Mus musculus OX=10090 GN=Znf668 PE=2 SV=1	1.931	2	1	1	1	1	619	68.3	8.87	0	1
High	O88796	Ribonuclease P protein subunit p30 OS=Mus musculus OX=10090 GN=Rpp30 PE=1 SV=1	1.93	5	1	1	1	1	268	29.5	9.06	1.86	1
High	A0A338P6K9	Glutamine and serine-rich 1 OS=Mus musculus OX=10090 GN=Qser1 PE=1 SV=1	1.928	2	1	1	1	1	1788	194.4	6.81	0	1
High	Q6PG04	Coiled-coil domain-containing protein 82 OS=Mus musculus OX=10090 GN=Ccdc82 PE=2 SV=1	1.927	2	1	1	1	1	518	61	5.43	0	1
High	A2CG63	AT-rich interactive domain-containing protein 4B OS=Mus musculus OX=10090 GN=Arid4b PE=1 SV=1	1.919	1	1	1	1	1	1314	147.6	5.06	0	1
High	Q9WTX2	Interferon-inducible double-stranded RNA-dependent protein kinase activator A OS=Mus musculus OX=10090 GN=Prkra PE=1 SV=1	1.914	3	1	1	1	1	313	34.3	8.43	0	1
High	Q3TK95	Uncharacterized protein OS=Mus musculus OX=10090 GN=Eif4e PE=1 SV=1	1.875	4	1	1	1	1	217	25	6.15	1.69	1
High	Q8VBW5	HMG box transcription factor BBX OS=Mus musculus OX=10090 GN=Bbx PE=1 SV=2	1.872	1	1	1	1	1	907	100.7	8.59	0	1
Medium	P48754	Breast cancer type 1 susceptibility protein homolog OS=Mus musculus OX=10090 GN=Brca1 PE=1 SV=3	1.845	1	1	1	1	1	1812	198.7	5.76	0	1
Medium	Q3TRW3	Staphylococcal nuclease domain-containing protein OS=Mus musculus OX=10090 GN=Snd1 PE=2 SV=1	1.845	1	1	1	1	1	910	102	7.56	0	1
Medium	P55200	Histone-lysine N-methyltransferase 2A OS=Mus musculus OX=10090 GN=Kmt2a PE=1 SV=3	1.837	0	1	1	1	1	3966	429.4	9.16	1.92	1
Medium	Q8VE80	THO complex subunit 3 OS=Mus musculus OX=10090 GN=Thoc3 PE=2 SV=1	1.831	3	1	1	1	1	351	38.7	6.09	0	1
Medium	Q9D318	GRAM domain-containing protein OS=Mus musculus OX=10090 GN=Gramd3 PE=2 SV=1	1.83	2	1	1	1	1	514	56.4	8.63	2.23	1
Medium	Q3TYA6	M-phase phosphoprotein 8 OS=Mus musculus OX=10090 GN=Mphosph8 PE=1 SV=1	1.819	2	1	1	1	1	858	97.4	5.85	2.21	1
Medium	Q8CIB9	N-acetyltransferase ESCO2 OS=Mus musculus OX=10090 GN=Esco2 PE=1 SV=3	1.799	1	1	1	1	1	592	67.2	9.48	0	1
Medium	Q9DAJ4	WD repeat domain-containing protein 83 OS=Mus musculus OX=10090 GN=Wdr83 PE=1 SV=1	1.795	4	1	1	1	1	315	34.4	5.87	2.05	1
Medium	Q3URT5	Notchless protein homolog 1 OS=Mus musculus OX=10090 GN=Nle1 PE=2 SV=1	1.794	3	1	1	1	1	485	53.3	7.17	0	1
Medium	P63037	DnaJ homolog subfamily A member 1 OS=Mus musculus OX=10090 GN=Dnaja1 PE=1 SV=1	1.792	3	1	1	1	1	397	44.8	7.08	0	1
Medium	A0A0N4SUT9	Peregrin OS=Mus musculus OX=10090 GN=Brpf1 PE=1 SV=1	1.79	1	1	1	1	1	1252	141.4	7.8	0	1
Medium	Q9D0B6	Protein PBDC1 OS=Mus musculus OX=10090 GN=Pbdc1 PE=1 SV=1	1.787	6	1	1	1	1	198	22.2	4.55	0	1
Medium	Q6ZWM4	U6 snRNA-associated Sm-like protein LSm8 OS=Mus musculus OX=10090 GN=Lsm8 PE=1 SV=3	1.752	7	1	1	1	1	96	10.4	4.48	0	1
Medium	B2RXQ8	WD repeat domain containing 82 OS=Mus musculus OX=10090 GN=Wdr82 PE=1 SV=1	1.747	7	1	1	1	1	313	35.1	7.69	2.04	1
Medium	A0A0R4J0J6	THO complex subunit 5 homolog OS=Mus musculus OX=10090 GN=Thoc5 PE=1 SV=1	1.746	1	1	1	1	1	683	78.7	7.12	0	1
Medium	Q9CX48	Zinc finger CCHC domain-containing protein 10 OS=Mus musculus OX=10090 GN=Zcchc10 PE=2 SV=1	1.726	7	1	1	1	1	178	19.1	9.42	1.95	1
Medium	Q9CX97	WD repeat-containing protein 55 OS=Mus musculus OX=10090 GN=Wdr55 PE=1 SV=2	1.724	4	1	1	1	1	388	42.6	4.89	0	1
Medium	Q8VC16	Leucine-rich repeat-containing protein 14 OS=Mus musculus OX=10090 GN=Lrrc14 PE=1 SV=1	1.722	1	1	1	1	1	493	54.9	6.67	1.69	1
Medium	A0A1Y7VNF4	ERO1-like protein beta OS=Mus musculus OX=10090 GN=Ero1b PE=1 SV=1	1.714	3	1	1	1	1	493	55.9	7.8	1.84	1
Medium	Q2T9H5	Vanin 3 OS=Mus musculus OX=10090 GN=Vnn3 PE=2 SV=1	1.713	3	1	1	1	1	500	56.2	6.54	0	1
Medium	Q80WM4	Hyaluronan and proteoglycan link protein 4 OS=Mus musculus OX=10090 GN=Hapln4 PE=2 SV=2	1.706	3	1	1	1	1	400	42.8	8.85	0	1
Medium	Q3UXZ9	Lysine-specific demethylase 5A OS=Mus musculus OX=10090 GN=Kdm5a PE=1 SV=2	1.704	1	1	1	1	1	1690	192.1	6.39	0	1
Medium	Q9EQH4-4	Isoform 4 of Transcription initiation factor TFIID subunit 8 OS=Mus musculus OX=10090 GN=Taf8	1.702	3	1	1	1	1	322	35.4	6.27	1.64	1
Medium	K7TGT6	IgA heavy chain variable region (Fragment) OS=Mus musculus OX=10090 PE=2 SV=1	1.655	6	1	3	1	1	109	11.7	8.46	4.26	1
Medium	Q3TFV6	Cyclin N-terminal domain-containing protein OS=Mus musculus OX=10090 GN=Ccnb1 PE=2 SV=1	1.649	3	1	1	1	1	430	48.1	7.43	0	1
Medium	Q3U0V1	Far upstream element-binding protein 2 OS=Mus musculus OX=10090 GN=Khsrp PE=1 SV=2	1.647	1	1	2	1	1	748	76.7	7.33	0	1
Medium	A0A0R4J124	SRSF protein kinase 2 OS=Mus musculus OX=10090 GN=Srpk2 PE=1 SV=1	1.643	1	1	1	1	1	682	76.8	4.91	0	1
Medium	Q641P0	Actin-related protein 3B OS=Mus musculus OX=10090 GN=Actr3b PE=1 SV=1	1.638	2	1	1	1	1	418	47.5	6.02	0	1
Medium	Q8R2U2	Nucleolus and neural progenitor protein OS=Mus musculus OX=10090 GN=Nepro PE=2 SV=1	1.636	2	1	1	1	1	564	63.4	9.94	0	1
Medium	P41209	Centrin-1 OS=Mus musculus OX=10090 GN=Cetn1 PE=1 SV=1	1.632	5	1	1	1	1	172	19.7	4.88	0	1
Medium	A0A0B4J1K5	Immunoglobulin lambda variable 3 (Fragment) OS=Mus musculus OX=10090 GN=Iglv3 PE=4 SV=1	1.619	8	1	1	1	1	122	13.4	5.76	1.66	1
Medium	E9Q284	Coilin OS=Mus musculus OX=10090 GN=Coil PE=1 SV=1	1.611	2	1	1	1	1	573	62.2	9.06	1.72	1
Medium	Q8R4R6	Nucleoporin NUP35 OS=Mus musculus OX=10090 GN=Nup35 PE=1 SV=2	1.611	6	1	1	1	1	325	34.8	9.25	0	1
Medium	Q9CZJ1	Probable U3 small nucleolar RNA-associated protein 11 OS=Mus musculus OX=10090 GN=Utp11 PE=2 SV=1	1.6	3	1	1	1	1	253	30.5	10.26	0	1
Medium	Q69ZR9	Protein TASOR OS=Mus musculus OX=10090 GN=Tasor PE=1 SV=2	1.593	1	1	1	1	1	1610	181.3	5.67	0	1
Medium	P12968	Islet amyloid polypeptide OS=Mus musculus OX=10090 GN=Iapp PE=3 SV=1	1.592	8	1	1	1	1	93	10	10.17	0	1
Medium	Q7TPD1	F-box only protein 11 OS=Mus musculus OX=10090 GN=Fbxo11 PE=1 SV=3	1.587	1	1	1	1	1	930	103.7	7.05	0	1
Medium	B2RWU3	Fanconi anemia, complementation group A OS=Mus musculus OX=10090 GN=Fanca PE=2 SV=1	1.578	1	1	1	1	1	1439	161.1	7.2	0	1
Medium	Q8K327	Chromosome alignment-maintaining phosphoprotein 1 OS=Mus musculus OX=10090 GN=Champ1 PE=1 SV=1	1.566	2	1	1	1	1	802	87.5	7.85	0	1
Medium	O88967	ATP-dependent zinc metalloprotease YME1L1 OS=Mus musculus OX=10090 GN=Yme1l1 PE=1 SV=1	1.561	4	1	1	1	1	715	80	8.97	0	1
Medium	Q811F1	Zinc finger and BTB domain-containing protein 41 OS=Mus musculus OX=10090 GN=Zbtb41 PE=2 SV=4	1.551	1	1	1	1	1	908	104.6	7.91	0	1
Medium	Q9QZD4	DNA repair endonuclease XPF OS=Mus musculus OX=10090 GN=Ercc4 PE=1 SV=3	1.551	1	1	1	1	1	917	103.6	7.71	0	1
Medium	Q8K1S5	Krueppel-like factor 11 OS=Mus musculus OX=10090 GN=Klf11 PE=2 SV=3	1.548	3	1	1	1	1	502	54	8.47	2.06	1
Medium	Q9CZD6	Proliferating cell nuclear antigen OS=Mus musculus OX=10090 GN=Pcna PE=2 SV=1	1.544	7	1	1	1	1	262	29	4.81	1.72	1
Medium	Q6PAK3	Protein arginine N-methyltransferase 8 OS=Mus musculus OX=10090 GN=Prmt8 PE=1 SV=2	1.53	2	1	1	1	1	394	45.2	6.93	0	1
Medium	B9EJV3	GREB1-like protein OS=Mus musculus OX=10090 GN=Greb1l PE=2 SV=1	1.529	1	1	1	1	1	1913	213.5	6.54	0	1
Medium	P28659-4	Isoform 4 of CUGBP Elav-like family member 1 OS=Mus musculus OX=10090 GN=Celf1	1.528	2	1	1	1	1	513	55.1	8.38	0	1
Medium	A0A087WPM0	Selenoprotein H OS=Mus musculus OX=10090 GN=Selenoh PE=1 SV=1	1.523	7	1	1	1	1	123	13.5	9.45	0	1
Medium	Q9D842	Aprataxin and PNK-like factor OS=Mus musculus OX=10090 GN=Aplf PE=1 SV=2	1.517	3	1	1	1	1	499	54.9	5.21	0	1
Medium	Q9CWX9	Probable ATP-dependent RNA helicase DDX47 OS=Mus musculus OX=10090 GN=Ddx47 PE=2 SV=2	1.514	3	1	1	1	1	455	50.6	9.1	0	1
Medium	Q61466	SWI/SNF-related matrix-associated actin-dependent regulator of chromatin subfamily D member 1 OS=Mus musculus OX=10090 GN=Smarcd1 PE=1 SV=3	1.513	2	1	1	1	1	515	58.2	9.25	0	1
Medium	B2RY84	Kif14 protein OS=Mus musculus OX=10090 GN=Kif14 PE=2 SV=1	1.505	1	1	1	1	1	1674	186.3	7.84	0	1
Medium	Q3TV93	HORMA domain-containing protein OS=Mus musculus OX=10090 GN=Mad2l1 PE=2 SV=1	1.491	5	1	1	1	1	205	23.5	5.08	0	1
Medium	Q9CQX4	PCNA-associated factor OS=Mus musculus OX=10090 GN=Pclaf PE=1 SV=1	1.488	15	1	1	1	1	110	12	9.89	0	1
Medium	Q0VGR5	CDK5 regulatory subunit associated protein 2 OS=Mus musculus OX=10090 GN=Cdk5rap2 PE=2 SV=1	1.483	0	1	1	1	1	1822	205.8	5.3	0	1
Medium	Q8BK67	Protein RCC2 OS=Mus musculus OX=10090 GN=Rcc2 PE=1 SV=1	1.481	3	1	1	1	1	520	55.9	8.72	0	1
Medium	Q3UBK2	High mobility group protein 1 OS=Mus musculus OX=10090 GN=Hmgb1 PE=2 SV=1	1.476	7	1	1	1	1	215	24.9	5.74	0	1
Medium	A0A068BFS4	E3 ubiquitin-protein ligase RING1 OS=Mus musculus OX=10090 GN=Ring1 PE=2 SV=1	1.456	3	1	1	1	1	406	42.6	5.74	0	1
Medium	Q3TKY6	Spliceosome-associated protein CWC27 homolog OS=Mus musculus OX=10090 GN=Cwc27 PE=1 SV=1	1.44	3	1	1	1	1	469	53.5	5.53	0	1
Medium	Q8BKP2	Zinc finger protein 189 OS=Mus musculus OX=10090 GN=Zfp189 PE=1 SV=1	1.438	1	1	1	1	1	608	70.5	8.75	1.67	1
Medium	O70325-3	Isoform Nuclear of Phospholipid hydroperoxide glutathione peroxidase OS=Mus musculus OX=10090 GN=Gpx4	1.437	2	1	1	1	1	253	29.2	10.23	0	1
Medium	Q8BFV2	PCI domain-containing protein 2 OS=Mus musculus OX=10090 GN=Pcid2 PE=1 SV=1	1.426	3	1	1	1	1	399	46.1	8.53	0	1
Medium	P58252	Elongation factor 2 OS=Mus musculus OX=10090 GN=Eef2 PE=1 SV=2	1.42	1	1	1	1	1	858	95.3	6.83	0	1
Medium	A0A0R5RP39	Sodium channel protein OS=Mus musculus OX=10090 GN=Scn11a PE=2 SV=1	1.419	1	1	1	1	1	1765	201.2	8.29	1.73	1
Medium	Q3THK3	General transcription factor IIF subunit 1 OS=Mus musculus OX=10090 GN=Gtf2f1 PE=1 SV=2	1.415	2	1	1	1	1	508	57.2	7.01	0	1
Medium	P61963	DDB1- and CUL4-associated factor 7 OS=Mus musculus OX=10090 GN=Dcaf7 PE=1 SV=1	1.409	2	1	1	1	1	342	38.9	5.52	0	1
Medium	Q1XID4	ATPase H(+)-transporting lysosomal accessory protein 2 OS=Mus musculus OX=10090 GN=Atp6ap2 PE=1 SV=2	1.405	2	1	1	1	1	350	39.1	5.54	1.66	1
Medium	Q8BX09	Retinoblastoma-binding protein 5 OS=Mus musculus OX=10090 GN=Rbbp5 PE=1 SV=2	1.39	2	1	1	1	1	538	59.1	5.1	1.68	1
Medium	O54774	AP-3 complex subunit delta-1 OS=Mus musculus OX=10090 GN=Ap3d1 PE=1 SV=1	1.39	1	1	1	1	1	1199	135	7.37	0	1
Medium	A0A0R4J0J5	Integrator complex subunit 9 OS=Mus musculus OX=10090 GN=Ints9 PE=1 SV=1	1.377	1	1	1	1	1	687	77.4	6.33	0	1
Medium	A0A571BDS0	Xin actin-binding repeat-containing protein 1 OS=Mus musculus OX=10090 GN=Xirp1 PE=1 SV=2	1.374	1	1	1	1	1	1813	196.5	5.92	0	1
Medium	E9PYH6	Histone-lysine N-methyltransferase SETD1A OS=Mus musculus OX=10090 GN=Setd1a PE=1 SV=1	1.366	1	1	1	1	1	1716	185.9	5.06	0	1
Medium	A0A494BB95	Eukaryotic translation initiation factor 4C OS=Mus musculus OX=10090 GN=Eif1a PE=1 SV=1	1.366	3	1	1	1	1	254	28.6	7.44	0	1
Medium	Q3TLH4	Protein PRRC2C OS=Mus musculus OX=10090 GN=Prrc2c PE=1 SV=3	1.354	0	1	1	1	1	2846	310.7	9.1	0	1
Medium	Q8VBV3	Exosome complex component RRP4 OS=Mus musculus OX=10090 GN=Exosc2 PE=1 SV=1	1.352	5	1	1	1	1	293	32.6	7.5	0	1
Medium	Q9JJ89	Coiled-coil domain-containing protein 86 OS=Mus musculus OX=10090 GN=Ccdc86 PE=1 SV=2	1.347	2	1	1	1	1	426	46.5	9.64	0	1
Medium	Q3U1J1	TCF3 fusion partner homolog OS=Mus musculus OX=10090 GN=Tfpt PE=1 SV=1	1.345	3	1	1	1	1	259	28.9	4.89	0	1
Medium	O89079	Coatomer subunit epsilon OS=Mus musculus OX=10090 GN=Cope PE=1 SV=3	1.335	6	1	1	1	1	308	34.5	5.06	2.69	1
Medium	E9Q555	E3 ubiquitin-protein ligase RNF213 OS=Mus musculus OX=10090 GN=Rnf213 PE=1 SV=2	1.335	0	1	1	1	1	5152	584.4	6.8	0	1
Medium	A0A087WNT1	Elongin-C OS=Mus musculus OX=10090 GN=Eloc PE=1 SV=1	1.324	9	1	1	1	1	134	14.9	4.73	0	1
Medium	Q9CYX7	RRP15-like protein OS=Mus musculus OX=10090 GN=Rrp15 PE=1 SV=2	1.311	3	1	1	1	1	281	31	8.76	1.8	1
Medium	Q8R1F0	Leydig cell tumor 10 kDa protein homolog OS=Mus musculus OX=10090 GN=D8Ertd738e PE=3 SV=1	1.299	7	1	1	1	1	94	10.2	11.63	1.68	1
Medium	Q6NZN1-2	Isoform 2 of Peroxisome proliferator-activated receptor gamma coactivator-related protein 1 OS=Mus musculus OX=10090 GN=Pprc1	1.282	1	1	1	1	1	1646	175.2	5.94	0	1
Medium	Q8BZH4	Pogo transposable element with ZNF domain OS=Mus musculus OX=10090 GN=Pogz PE=1 SV=2	1.277	0	1	1	1	1	1409	154.8	7.52	0	1
Medium	Q7TQ38	Protease OS=Mus musculus OX=10090 GN=gag PE=4 SV=1	1.277	5	1	1	1	1	259	28	8.25	1.71	1
Medium	Q80T69	Lysine-specific demethylase 9 OS=Mus musculus OX=10090 GN=Rsbn1 PE=1 SV=3	1.268	1	1	1	1	1	795	89.2	8.65	0	1
Medium	Q5RIM6	Nuclear receptor corepressor 1 OS=Mus musculus OX=10090 GN=Ncor1 PE=1 SV=1	1.263	0	1	1	1	1	2454	270.6	6.93	0	1

## Sheet: IgG IP 2
Protein FDR Confidence: Combined	Accession	Description	Sum PEP Score	Coverage [%]	# Peptides	# PSMs	# Unique Peptides	# Protein Groups	# AAs	MW [kDa]	calc. pI	Score Sequest HT: Sequest HT	# Peptides (by Search Engine): Sequest HT
High	E9PVX6	Proliferation marker protein Ki-67 OS=Mus musculus OX=10090 GN=Mki67 PE=1 SV=1	788.62	62	170	316	170	1	3177	350.7	9.72	785.67	170
High	E9Q7G0	Nuclear mitotic apparatus protein 1 OS=Mus musculus OX=10090 GN=Numa1 PE=1 SV=1	601.32	63	119	239	79	1	2094	235.5	5.87	655.07	119
High	F6ZQA3	Nuclear mitotic apparatus protein 1 (Fragment) OS=Mus musculus OX=10090 GN=Numa1 PE=1 SV=1	227.629	61	41	78	1	1	741	82.8	9.44	234.04	41
High	E9QNN1	DEAH box protein 9 OS=Mus musculus OX=10090 GN=Dhx9 PE=1 SV=1	194.783	45	48	76	48	1	1384	149.6	6.83	195.22	48
High	Q6P4T2	U5 small nuclear ribonucleoprotein 200 kDa helicase OS=Mus musculus OX=10090 GN=Snrnp200 PE=1 SV=1	166.755	28	48	56	48	1	2136	244.4	6.06	120.7	48
High	A0A068BFR6	Kinesin-like protein OS=Mus musculus OX=10090 GN=Kifc1 PE=2 SV=1	151.183	56	33	70	6	1	674	74.1	8.72	199.39	33
High	Q80WE4	Kinesin-like protein KIF20B OS=Mus musculus OX=10090 GN=Kif20b PE=1 SV=3	147.677	32	51	55	51	1	1774	203.4	5.78	124.5	51
High	E9PUA5	Kinesin-like protein OS=Mus musculus OX=10090 GN=Kifc5b PE=1 SV=1	135.773	56	31	59	2	1	672	73.6	8.81	159.18	31
High	Q99PV0	Pre-mRNA-processing-splicing factor 8 OS=Mus musculus OX=10090 GN=Prpf8 PE=1 SV=2	135.171	27	53	55	53	1	2335	273.4	8.84	82.83	53
High	Q571G8	MKIAA1649 protein (Fragment) OS=Mus musculus OX=10090 GN=Poldip3 PE=2 SV=1	112.122	62	26	56	26	1	453	49.7	10.42	118.65	26
High	Q6PHP4	Zinc finger protein 512B (Fragment) OS=Mus musculus OX=10090 GN=Zfp512b PE=1 SV=1	109.458	42	24	36	24	1	879	96.2	9.83	91.57	24
High	Q7TPV4	Myb-binding protein 1A OS=Mus musculus OX=10090 GN=Mybbp1a PE=1 SV=2	108.769	27	31	41	31	1	1344	151.9	8.95	87.45	31
High	G5E866	Splicing factor 3B subunit 1 OS=Mus musculus OX=10090 GN=Sf3b1 PE=1 SV=1	103.698	30	28	32	28	1	1304	145.7	7.09	77.11	28
High	Q3TF18	Poly [ADP-ribose] polymerase OS=Mus musculus OX=10090 GN=Parp1 PE=2 SV=1	103.497	32	29	42	29	1	1014	112.6	8.98	93.34	29
High	P09405	Nucleolin OS=Mus musculus OX=10090 GN=Ncl PE=1 SV=2	102.731	40	30	62	30	1	707	76.7	4.75	139.88	30
High	G3X956	FACT complex subunit OS=Mus musculus OX=10090 GN=Supt16 PE=1 SV=1	100.887	32	34	44	34	1	1047	119.8	5.66	83.44	34
High	P43275	Histone H1.1 OS=Mus musculus OX=10090 GN=H1-1 PE=1 SV=2	98.199	38	14	66	12	1	213	21.8	10.93	176.2	14
High	O88532	Zinc finger RNA-binding protein OS=Mus musculus OX=10090 GN=Zfr PE=1 SV=2	93.801	33	26	29	26	1	1074	116.8	9.04	71.38	26
High	D3YYT1	Glyoxylate reductase 1 homolog OS=Mus musculus OX=10090 GN=Glyr1 PE=1 SV=1	91.111	46	17	26	17	1	552	60.4	9.13	75.92	17
High	A2APB8	Targeting protein for Xklp2 OS=Mus musculus OX=10090 GN=Tpx2 PE=1 SV=1	90.588	42	30	42	30	1	745	85.8	9.38	85.87	30
High	S4R1M2	Scaffold attachment factor B1 OS=Mus musculus OX=10090 GN=Safb PE=1 SV=1	89.543	33	26	36	17	1	939	105.3	5.38	87.28	26
High	Q6A0E3	116 kDa U5 small nuclear ribonucleoprotein component (Fragment) OS=Mus musculus OX=10090 GN=Eftud2 PE=2 SV=1	86.961	35	25	30	25	1	976	109.7	5	61.82	25
High	Q9ERH4	Nucleolar and spindle-associated protein 1 OS=Mus musculus OX=10090 GN=Nusap1 PE=1 SV=1	85.578	47	21	46	21	1	427	48.5	9.89	109.72	21
High	Q80TU6	MKIAA0670 protein (Fragment) OS=Mus musculus OX=10090 GN=Acin1 PE=2 SV=1	85.014	29	25	38	3	1	1266	142.8	5.63	70.31	25
High	B2RRX1	Actin, beta OS=Mus musculus OX=10090 GN=Actb PE=2 SV=1	80.493	59	14	21	2	1	375	41.7	5.48	60.21	14
High	Q5SQB7	Nucleophosmin OS=Mus musculus OX=10090 GN=Npm1 PE=1 SV=1	79.776	53	16	34	16	1	292	32.5	4.77	70.52	16
High	Q9JIX8-4	Isoform 4 of Apoptotic chromatin condensation inducer in the nucleus OS=Mus musculus OX=10090 GN=Acin1	78.824	25	23	36	1	1	1298	146.2	6.13	67.08	23
High	Q8C2Q3	RNA-binding protein 14 OS=Mus musculus OX=10090 GN=Rbm14 PE=1 SV=1	78.336	44	22	31	22	1	669	69.4	9.67	70.79	22
High	Q9Z204-2	Isoform C1 of Heterogeneous nuclear ribonucleoproteins C1/C2 OS=Mus musculus OX=10090 GN=Hnrnpc	76.929	54	19	33	2	1	300	33	5.03	83.33	19
High	Q5BJ94	Kifc1 protein OS=Mus musculus OX=10090 GN=Kifc1 PE=2 SV=1	76.454	48	22	40	1	1	497	55	8.32	95	22
High	Q3UBP6	Uncharacterized protein OS=Mus musculus OX=10090 GN=Actb PE=2 SV=1	75.848	56	13	19	1	1	375	41.7	5.48	55.24	13
High	P27659	60S ribosomal protein L3 OS=Mus musculus OX=10090 GN=Rpl3 PE=1 SV=3	75.84	45	20	29	20	1	403	46.1	10.21	68.95	20
High	P99024	Tubulin beta-5 chain OS=Mus musculus OX=10090 GN=Tubb5 PE=1 SV=1	73.957	57	15	22	3	1	444	49.6	4.89	65.65	15
High	Q52L97	Importin subunit alpha OS=Mus musculus OX=10090 GN=Kpna2 PE=1 SV=1	73.956	46	16	20	16	1	529	57.9	5.68	58.15	16
High	B2RSV4	Splicing factor 3b, subunit 3 OS=Mus musculus OX=10090 GN=Sf3b3 PE=2 SV=1	72.557	26	24	26	24	1	1217	135.5	5.26	61.14	24
High	Q69Z99	Zinc finger protein 512 OS=Mus musculus OX=10090 GN=Znf512 PE=2 SV=2	70.78	42	20	25	20	1	562	63.9	9.51	52.76	20
High	Q7TS74	Cytoskeleton-associated protein 2-like OS=Mus musculus OX=10090 GN=Ckap2l PE=1 SV=1	69.402	35	19	24	19	1	745	82.9	9.69	59.67	19
High	Q9D8E6	60S ribosomal protein L4 OS=Mus musculus OX=10090 GN=Rpl4 PE=1 SV=3	69.169	46	18	28	18	1	419	47.1	11	68.25	18
High	Q3V0Z8	DEAD box protein 5 (Fragment) OS=Mus musculus OX=10090 GN=Ddx5 PE=2 SV=1	68.939	33	22	39	16	1	690	76.7	8.6	84.42	22
High	P15864	Histone H1.2 OS=Mus musculus OX=10090 GN=H1-2 PE=1 SV=2	67.718	43	15	44	5	1	212	21.3	11	114.7	15
High	Q3U6P5	RRM domain-containing protein OS=Mus musculus OX=10090 GN=Hnrnpc PE=2 SV=1	67.486	51	19	32	2	1	334	36.9	7.36	80.69	19
High	Q3TEA8	Heterochromatin protein 1-binding protein 3 OS=Mus musculus OX=10090 GN=Hp1bp3 PE=1 SV=1	66.691	43	21	36	1	1	554	60.8	9.7	64.44	21
High	Q8BTI8	Serine/arginine repetitive matrix protein 2 OS=Mus musculus OX=10090 GN=Srrm2 PE=1 SV=3	66.288	12	23	27	23	1	2703	294.7	12.03	55.78	23
High	G3UY19	Protein regulator of cytokinesis 1 OS=Mus musculus OX=10090 GN=Prc1 PE=1 SV=1	65.744	41	19	24	18	1	566	66.5	7.93	59.28	19
High	P68040	Receptor of activated protein C kinase 1 OS=Mus musculus OX=10090 GN=Rack1 PE=1 SV=3	64.965	75	17	25	17	1	317	35.1	7.69	66.98	17
High	Q3TVV6	Uncharacterized protein OS=Mus musculus OX=10090 GN=Hnrnpu PE=2 SV=1	64.936	31	18	26	18	1	800	87.9	6.24	56.25	18
High	Q9Z277	Tyrosine-protein kinase BAZ1B OS=Mus musculus OX=10090 GN=Baz1b PE=1 SV=2	64.691	18	22	25	22	1	1479	170.5	8.6	45.21	22
High	P70399	TP53-binding protein 1 OS=Mus musculus OX=10090 GN=Tp53bp1 PE=1 SV=3	64.444	15	19	20	19	1	1969	212.6	4.63	42.13	19
High	Q3TEA8-2	Isoform 2 of Heterochromatin protein 1-binding protein 3 OS=Mus musculus OX=10090 GN=Hp1bp3	64.156	42	21	36	1	1	541	59.5	9.79	61.09	21
High	P47911	60S ribosomal protein L6 OS=Mus musculus OX=10090 GN=Rpl6 PE=1 SV=3	62.806	43	16	33	16	1	296	33.5	10.7	54.44	16
High	Q3UAI4	SAP domain-containing protein OS=Mus musculus OX=10090 GN=Sf3b2 PE=2 SV=1	62.264	29	19	23	19	1	878	98.1	5.58	51.22	19
High	Q1WWK3	Hist1h1b protein (Fragment) OS=Mus musculus OX=10090 GN=H1f5 PE=2 SV=1	60.516	45	16	36	12	1	222	22.4	10.92	85.12	16
High	A0A1S6GWJ8	Uncharacterized protein OS=Mus musculus OX=10090 GN=Hnrnpm PE=2 SV=1	59.047	31	23	28	23	1	809	86.4	9.11	53.08	23
High	P68372	Tubulin beta-4B chain OS=Mus musculus OX=10090 GN=Tubb4b PE=1 SV=1	58.58	50	14	18	2	1	445	49.8	4.89	51.14	14
High	P43274	Histone H1.4 OS=Mus musculus OX=10090 GN=H1-4 PE=1 SV=2	58.44	28	12	37	2	1	219	22	11.11	86	12
High	Q3TW77	Uncharacterized protein OS=Mus musculus OX=10090 GN=Grn PE=2 SV=1	58.033	24	8	13	8	1	602	65	6.99	50.29	8
High	P20029	Endoplasmic reticulum chaperone BiP OS=Mus musculus OX=10090 GN=Hspa5 PE=1 SV=3	57.425	30	18	22	17	1	655	72.4	5.16	53.13	18
High	E9QMP6	Non-specific serine/threonine protein kinase OS=Mus musculus OX=10090 GN=Mark2 PE=1 SV=2	57.041	31	18	21	12	1	776	86.3	9.67	43.93	18
High	A2AWT5	Nucleolar transcription factor 1 OS=Mus musculus OX=10090 GN=Ubtf PE=1 SV=1	56.565	25	16	22	16	1	764	89.4	5.81	41.66	16
High	P29341	Polyadenylate-binding protein 1 OS=Mus musculus OX=10090 GN=Pabpc1 PE=1 SV=2	55.713	34	21	28	15	1	636	70.6	9.5	44.23	21
High	P62702	40S ribosomal protein S4, X isoform OS=Mus musculus OX=10090 GN=Rps4x PE=1 SV=2	54.632	48	14	23	14	1	263	29.6	10.15	53.91	14
High	P97351	40S ribosomal protein S3a OS=Mus musculus OX=10090 GN=Rps3a PE=1 SV=3	54.502	58	17	31	17	1	264	29.9	9.73	54.49	17
High	Q569Z6	Thyroid hormone receptor-associated protein 3 OS=Mus musculus OX=10090 GN=Thrap3 PE=1 SV=1	54.077	25	20	24	19	1	951	108.1	10.17	50.46	20
High	Q3UXI9	DZF domain-containing protein OS=Mus musculus OX=10090 GN=Ilf2 PE=2 SV=1	54.033	45	13	20	13	1	390	43	5.14	47.62	13
High	Q3U741	RNA helicase OS=Mus musculus OX=10090 GN=Ddx17 PE=1 SV=1	53.146	32	19	29	13	1	652	72.5	8.68	62.07	19
High	Q00PI9	Heterogeneous nuclear ribonucleoprotein U-like protein 2 OS=Mus musculus OX=10090 GN=Hnrnpul2 PE=1 SV=2	53.136	29	19	23	19	1	745	84.9	4.89	34.41	19
High	Q08943-2	Isoform 2 of FACT complex subunit SSRP1 OS=Mus musculus OX=10090 GN=Ssrp1	53.087	26	15	21	15	1	713	81.4	7.01	44.38	15
High	Q32P04	Keratin 5 OS=Mus musculus OX=10090 GN=Krt5 PE=1 SV=2	52.82	22	17	34	5	1	580	61.7	7.75	69.47	17
High	Q6ZQ61	MKIAA0723 protein (Fragment) OS=Mus musculus OX=10090 GN=Matr3 PE=2 SV=1	51.63	21	15	16	15	1	852	95.2	6.27	40.24	15
High	Q3TQX5	RNA helicase OS=Mus musculus OX=10090 GN=Ddx3x PE=1 SV=1	51.204	27	13	15	12	1	662	73.1	7.18	39.92	13
High	Q8K224	RNA cytidine acetyltransferase OS=Mus musculus OX=10090 GN=Nat10 PE=1 SV=1	50.836	21	19	20	19	1	1024	115.3	8.32	28.46	19
High	Q8K4Z5	Splicing factor 3A subunit 1 OS=Mus musculus OX=10090 GN=Sf3a1 PE=1 SV=1	50.463	28	19	24	19	1	791	88.5	5.22	37.86	19
High	P14148	60S ribosomal protein L7 OS=Mus musculus OX=10090 GN=Rpl7 PE=1 SV=2	50.206	51	15	25	15	1	270	31.4	10.89	43.26	15
High	Q8VIJ6	Splicing factor, proline- and glutamine-rich OS=Mus musculus OX=10090 GN=Sfpq PE=1 SV=1	50.19	28	16	18	15	1	699	75.4	9.44	43.18	16
High	Q5YLW3	40S ribosomal protein S3 OS=Mus musculus OX=10090 GN=Rps3 PE=1 SV=1	50.032	67	16	31	16	1	243	26.7	9.66	75.13	16
High	Q68FG3	Protein SPT2 homolog OS=Mus musculus OX=10090 GN=Spty2d1 PE=2 SV=1	49.302	33	20	25	20	1	682	74.8	9.76	46.35	20
High	P47962	60S ribosomal protein L5 OS=Mus musculus OX=10090 GN=Rpl5 PE=1 SV=3	48.708	45	14	16	14	1	297	34.4	9.77	41.95	14
High	A0A0R4J098	Zinc finger protein 326 OS=Mus musculus OX=10090 GN=Zfp326 PE=1 SV=1	47.172	34	14	16	14	1	580	65.1	5.21	34.99	14
High	A0A0R4J1A6	GAS2-like protein 3 OS=Mus musculus OX=10090 GN=Gas2l3 PE=1 SV=1	46.805	30	14	14	14	1	683	74.2	9.6	30.43	14
High	Q9CXS4	Centromere protein V OS=Mus musculus OX=10090 GN=Cenpv PE=1 SV=2	45.811	48	9	20	9	1	252	27.5	9.79	56.08	9
High	P99027	60S acidic ribosomal protein P2 OS=Mus musculus OX=10090 GN=Rplp2 PE=1 SV=3	44.873	79	9	16	9	1	115	11.6	4.54	37.99	9
High	Q8CGP2-2	Isoform 2 of Histone H2B type 1-P OS=Mus musculus OX=10090 GN=Hist1h2bp	44.257	51	8	24	8	1	138	15.6	10.24	64.45	8
High	Q91ZW3	SWI/SNF-related matrix-associated actin-dependent regulator of chromatin subfamily A member 5 OS=Mus musculus OX=10090 GN=Smarca5 PE=1 SV=1	43.859	18	20	23	20	1	1051	121.6	8.15	34.27	20
High	D3YWX2	YLP motif-containing protein 1 OS=Mus musculus OX=10090 GN=Ylpm1 PE=1 SV=2	43.736	9	15	15	15	1	2139	240.9	6.68	28.36	15
High	Q62018	RNA polymerase-associated protein CTR9 homolog OS=Mus musculus OX=10090 GN=Ctr9 PE=1 SV=2	43.426	16	16	17	16	1	1173	133.3	6.49	31.84	16
High	P63017	Heat shock cognate 71 kDa protein OS=Mus musculus OX=10090 GN=Hspa8 PE=1 SV=1	43.102	24	13	15	12	1	646	70.8	5.52	31.8	13
High	Q3UK83	Helix-destabilizing protein OS=Mus musculus OX=10090 GN=Hnrnpa1 PE=2 SV=1	42.965	36	11	14	10	1	373	38.8	9.13	27.25	11
High	Q91VC3	Eukaryotic initiation factor 4A-III OS=Mus musculus OX=10090 GN=Eif4a3 PE=1 SV=3	42.798	45	15	17	15	1	411	46.8	6.73	33.99	15
High	Q80YR5	Scaffold attachment factor B2 OS=Mus musculus OX=10090 GN=Safb2 PE=1 SV=2	42.733	12	11	14	2	1	991	111.8	6.38	40.29	11
High	Q3U561	Ribosomal protein OS=Mus musculus OX=10090 GN=Rpl10a PE=2 SV=1	42.697	45	11	18	11	1	217	24.8	9.94	43.28	11
High	Q5FWB6	60S acidic ribosomal protein P0 OS=Mus musculus OX=10090 GN=Rplp0 PE=2 SV=1	42.603	56	12	18	12	1	317	34.2	6.25	51.06	12
High	P50446	Keratin, type II cytoskeletal 6A OS=Mus musculus OX=10090 GN=Krt6a PE=1 SV=3	42.353	21	15	22	4	1	553	59.3	7.94	50.16	15
High	Q61213	Protease OS=Mus musculus OX=10090 GN=gag PE=2 SV=1	42.227	18	10	14	4	1	827	91.6	9.29	38.16	10
High	Q91W39	Nuclear receptor coactivator 5 OS=Mus musculus OX=10090 GN=Ncoa5 PE=1 SV=1	42.079	27	12	15	12	1	579	65.3	9.82	29.7	12
High	Q8BT90	40S ribosomal protein S17 (Fragment) OS=Mus musculus OX=10090 GN=Rps17 PE=2 SV=1	41.818	56	8	12	8	1	141	16.1	9.94	32.3	8
High	Q99KP6	Pre-mRNA-processing factor 19 OS=Mus musculus OX=10090 GN=Prpf19 PE=1 SV=1	41.385	36	11	21	11	1	504	55.2	6.61	27.14	11
High	Q8CGC6	RNA-binding protein 28 OS=Mus musculus OX=10090 GN=Rbm28 PE=1 SV=4	40.956	21	14	15	3	1	750	84.2	9.54	35.84	14
High	O88569	Heterogeneous nuclear ribonucleoproteins A2/B1 OS=Mus musculus OX=10090 GN=Hnrnpa2b1 PE=1 SV=2	40.778	32	11	17	10	1	353	37.4	8.95	38.89	11
High	P68369	Tubulin alpha-1A chain OS=Mus musculus OX=10090 GN=Tuba1a PE=1 SV=1	40.551	35	12	18	1	1	451	50.1	5.06	35.64	12
High	P35550	rRNA 2'-O-methyltransferase fibrillarin OS=Mus musculus OX=10090 GN=Fbl PE=1 SV=2	40.478	37	10	14	10	1	327	34.3	10.24	40.54	10
High	Q3TF40	Uncharacterized protein (Fragment) OS=Mus musculus OX=10090 GN=Nono PE=2 SV=1	40.068	32	15	18	14	1	528	60.4	9.61	35.4	15
High	Q99ME9	GTP-binding protein 4 OS=Mus musculus OX=10090 GN=Gtpbp4 PE=1 SV=3	39.776	25	15	16	15	1	634	74.1	9.52	31.46	15
High	Q91XH8	Cellular tumor antigen p53 OS=Mus musculus OX=10090 GN=Trp53 PE=2 SV=1	39.222	38	12	14	12	1	391	43.5	7.05	29.54	12
High	P62806	Histone H4 OS=Mus musculus OX=10090 GN=H4c1 PE=1 SV=2	39.115	59	10	21	10	1	103	11.4	11.36	48.66	10
High	Q61666	Protein HIRA OS=Mus musculus OX=10090 GN=Hira PE=1 SV=3	38.388	17	14	17	14	1	1015	111.7	8.06	28.15	14
High	Q3TWW8	Serine/arginine-rich splicing factor 6 OS=Mus musculus OX=10090 GN=Srsf6 PE=1 SV=1	38.314	31	12	16	10	1	339	39	11.46	38.49	12
High	Q3TUQ5	Pinin OS=Mus musculus OX=10090 GN=Pnn PE=1 SV=1	38.04	20	13	14	13	1	726	82.5	7.01	26.48	13
High	P05213	Tubulin alpha-1B chain OS=Mus musculus OX=10090 GN=Tuba1b PE=1 SV=2	37.98	35	12	18	1	1	451	50.1	5.06	35.3	12
High	Q80V08	60S ribosomal protein L17 (Fragment) OS=Mus musculus OX=10090 GN=Rpl17 PE=2 SV=1	37.898	45	7	12	7	1	194	22.4	10.33	32.92	7
High	Q3TL71	Heterogeneous nuclear ribonucleoprotein K OS=Mus musculus OX=10090 GN=Hnrnpk PE=2 SV=1	37.803	31	11	13	11	1	464	51	5.45	32.42	11
High	P62242	40S ribosomal protein S8 OS=Mus musculus OX=10090 GN=Rps8 PE=1 SV=2	37.788	52	11	23	11	1	208	24.2	10.32	49.75	11
High	Q80UT7	60S ribosomal protein L7a (Fragment) OS=Mus musculus OX=10090 GN=Rpl7a PE=2 SV=1	37.757	44	14	21	14	1	270	30.5	10.55	52.03	14
High	Q64012-2	Isoform 1 of RNA-binding protein Raly OS=Mus musculus OX=10090 GN=Raly	37.201	43	12	15	12	1	296	31.2	9.38	28.91	12
High	E9Q5G3	Kinesin-like protein KIF23 OS=Mus musculus OX=10090 GN=Kif23 PE=1 SV=1	36.968	14	10	11	10	1	953	108.7	8.66	27.2	10
High	P62137	Serine/threonine-protein phosphatase PP1-alpha catalytic subunit OS=Mus musculus OX=10090 GN=Ppp1ca PE=1 SV=1	36.608	43	12	16	4	1	330	37.5	6.33	28.69	12
High	Q8BG05-2	Isoform 2 of Heterogeneous nuclear ribonucleoprotein A3 OS=Mus musculus OX=10090 GN=Hnrnpa3	36.243	30	9	9	1	1	357	37.1	8.31	16.82	9
High	P25444	40S ribosomal protein S2 OS=Mus musculus OX=10090 GN=Rps2 PE=1 SV=3	35.386	40	10	17	1	1	293	31.2	10.24	33.7	10
High	Q3TL20	40S ribosomal protein S2 OS=Mus musculus OX=10090 GN=Rps2 PE=2 SV=1	35.386	40	10	17	1	1	293	31.2	10.3	33.7	10
High	Q3UZG3	Uncharacterized protein OS=Mus musculus OX=10090 GN=Hnrnpa3 PE=2 SV=1	35.31	32	10	10	2	1	379	39.7	9.1	19.02	10
High	Q3TFE5	RNA helicase OS=Mus musculus OX=10090 GN=Dhx15 PE=2 SV=1	35.077	17	11	12	11	1	795	91	7.44	17.29	11
High	P47963	60S ribosomal protein L13 OS=Mus musculus OX=10090 GN=Rpl13 PE=1 SV=3	34.865	45	13	20	13	1	211	24.3	11.55	37.82	13
High	Q9D6Z1	Nucleolar protein 56 OS=Mus musculus OX=10090 GN=Nop56 PE=1 SV=2	34.75	20	10	12	10	1	580	64.4	9.14	29.75	10
High	Q6NZQ2	Probable ATP-dependent RNA helicase DDX31 OS=Mus musculus OX=10090 GN=Ddx31 PE=2 SV=2	34.409	20	10	12	10	1	687	76.9	9.74	22.15	10
High	G5E870	E3 ubiquitin-protein ligase TRIP12 OS=Mus musculus OX=10090 GN=Trip12 PE=1 SV=1	34.306	9	12	13	8	1	2025	224	8.35	25.42	12
High	Q8BVE8-2	Isoform 2 of Histone-lysine N-methyltransferase NSD2 OS=Mus musculus OX=10090 GN=Nsd2	34.2	14	14	14	14	1	1366	152.3	8.51	15.43	14
High	Q8R080	G2 and S phase-expressed protein 1 OS=Mus musculus OX=10090 GN=Gtse1 PE=1 SV=2	33.891	21	13	13	13	1	741	78.7	9.39	21.41	13
High	Q04750	DNA topoisomerase 1 OS=Mus musculus OX=10090 GN=Top1 PE=1 SV=2	33.84	22	15	15	15	1	767	90.8	9.33	22.37	15
High	G5E924	Heterogeneous nuclear ribonucleoprotein L (Fragment) OS=Mus musculus OX=10090 GN=Hnrnpl PE=1 SV=1	33.803	30	13	14	13	1	615	66.9	8.18	25.59	13
High	Q8JZM7	Parafibromin OS=Mus musculus OX=10090 GN=Cdc73 PE=1 SV=1	33.683	32	14	16	14	1	531	60.5	9.61	30.1	14
High	Q4FZE6	40S ribosomal protein S7 OS=Mus musculus OX=10090 GN=Rps7 PE=2 SV=1	33.669	46	6	8	6	1	194	22.1	10.1	30.26	6
High	Q8R2W6	RNA binding motif protein 28 OS=Mus musculus OX=10090 GN=Rbm28 PE=2 SV=1	33.602	26	12	13	1	1	500	56.3	9.64	28.62	12
High	Q5BLK1	40S ribosomal protein S6 OS=Mus musculus OX=10090 GN=Rps6 PE=1 SV=1	33.525	32	11	15	11	1	249	28.7	10.84	38.55	11
High	Q01320	DNA topoisomerase 2-alpha OS=Mus musculus OX=10090 GN=Top2a PE=1 SV=2	33.225	10	14	14	9	1	1528	172.7	8.6	19.03	14
High	Q3U8W9	Uncharacterized protein OS=Mus musculus OX=10090 GN=Hnrnpr PE=2 SV=1	32.791	22	12	12	12	1	632	70.8	8.13	15.48	12
High	Q5M9M4	40S ribosomal protein S15a OS=Mus musculus OX=10090 GN=Rps15a PE=1 SV=1	32.493	57	8	16	8	1	130	14.8	10.13	44.22	8
High	P63087-2	Isoform 2 of Serine/threonine-protein phosphatase PP1-gamma catalytic subunit OS=Mus musculus OX=10090 GN=Ppp1cc	32.431	36	10	13	1	1	337	38.5	6.13	23.35	10
High	P62141	Serine/threonine-protein phosphatase PP1-beta catalytic subunit OS=Mus musculus OX=10090 GN=Ppp1cb PE=1 SV=3	32.422	37	10	13	2	1	327	37.2	6.19	22.54	10
High	C7G3P2	PRP4 pre-mRNA-processing factor 4 homolog (Fragment) OS=Mus musculus OX=10090 GN=Prpf4b PE=2 SV=1	32.364	12	12	12	12	1	1011	117.4	10.23	22.11	12
High	Q7JJ13	Bromodomain-containing protein 2 OS=Mus musculus OX=10090 GN=Brd2 PE=1 SV=1	32.171	17	12	13	11	1	798	88	9.13	16.74	12
High	Q9DBY8	Nuclear valosin-containing protein-like OS=Mus musculus OX=10090 GN=Nvl PE=1 SV=1	31.975	19	13	13	13	1	855	94.4	6.35	25.78	13
High	Q3US17	Zinc finger protein 48 OS=Mus musculus OX=10090 GN=Znf48 PE=1 SV=2	31.657	28	10	10	10	1	591	64.6	9.41	18.06	10
High	A0A1S6GWJ4	RNA helicase OS=Mus musculus OX=10090 GN=Ddx41 PE=1 SV=1	31.582	24	15	16	15	1	633	71.1	6.83	21.16	15
High	P10126	Elongation factor 1-alpha 1 OS=Mus musculus OX=10090 GN=Eef1a1 PE=1 SV=3	31.18	30	10	11	10	1	462	50.1	9.01	22.29	10
High	O08583	THO complex subunit 4 OS=Mus musculus OX=10090 GN=Alyref PE=1 SV=3	30.561	39	6	11	6	1	255	26.9	11.15	23.57	6
High	P04104	Keratin, type II cytoskeletal 1 OS=Mus musculus OX=10090 GN=Krt1 PE=1 SV=4	30.479	7	8	18	1	1	637	65.6	8.15	51.33	8
High	P62751	60S ribosomal protein L23a OS=Mus musculus OX=10090 GN=Rpl23a PE=1 SV=1	30.008	51	11	18	11	1	156	17.7	10.45	34.15	11
High	Q8K019	Bcl-2-associated transcription factor 1 OS=Mus musculus OX=10090 GN=Bclaf1 PE=1 SV=2	29.685	17	13	15	12	1	919	105.9	9.99	14.04	13
High	Q62383	Transcription elongation factor SPT6 OS=Mus musculus OX=10090 GN=Supt6h PE=1 SV=2	29.682	8	12	12	12	1	1726	199	4.93	20.78	12
High	Q8K363	ATP-dependent RNA helicase DDX18 OS=Mus musculus OX=10090 GN=Ddx18 PE=1 SV=1	29.664	21	12	15	12	1	660	74.1	9.52	25.73	12
High	Q9EQD6	Keratin intermediate filament 16a OS=Mus musculus OX=10090 GN=K16 PE=3 SV=1	29.373	19	10	21	6	1	474	52	5.2	33.67	10
High	E9QN31	Probable 28S rRNA (cytosine-C(5))-methyltransferase OS=Mus musculus OX=10090 GN=Nop2 PE=1 SV=1	29.36	17	10	16	5	1	794	86.9	9.19	19.34	10
High	P11087	Collagen alpha-1(I) chain OS=Mus musculus OX=10090 GN=Col1a1 PE=1 SV=4	28.96	7	7	17	6	1	1453	137.9	5.85	34.16	7
High	P62843	40S ribosomal protein S15 OS=Mus musculus OX=10090 GN=Rps15 PE=1 SV=2	28.926	31	4	7	4	1	145	17	10.39	26.67	4
High	P10922	Histone H1.0 OS=Mus musculus OX=10090 GN=H1-0 PE=2 SV=4	28.795	31	8	14	8	1	194	20.8	10.9	32.72	8
High	P62830	60S ribosomal protein L23 OS=Mus musculus OX=10090 GN=Rpl23 PE=1 SV=1	28.774	56	6	10	6	1	140	14.9	10.51	28.32	6
High	Q5M9P3	40S ribosomal protein S19 (Fragment) OS=Mus musculus OX=10090 GN=Rps19 PE=2 SV=1	28.721	46	10	13	10	1	151	16.7	10.52	20.27	10
High	Q6IFX2	Keratin, type I cytoskeletal 42 OS=Mus musculus OX=10090 GN=Krt42 PE=1 SV=1	28.423	21	10	15	5	1	452	50.1	5.16	31.15	10
High	P62889	60S ribosomal protein L30 OS=Mus musculus OX=10090 GN=Rpl30 PE=1 SV=2	28.364	67	8	14	8	1	115	12.8	9.63	34.2	8
High	Q7TQ39	Gag protein OS=Mus musculus OX=10090 GN=gag PE=4 SV=1	28.235	19	8	9	2	1	586	65.4	8.75	23.24	8
High	Q3U1C2	RuvB-like helicase OS=Mus musculus OX=10090 GN=Ruvbl1 PE=1 SV=1	28.219	24	9	9	9	1	456	50.2	6.42	21.02	9
High	Q8VH51	RNA-binding protein 39 OS=Mus musculus OX=10090 GN=Rbm39 PE=1 SV=2	27.977	23	10	11	10	1	530	59.4	10.1	23	10
High	Q3UL54	Uncharacterized protein OS=Mus musculus OX=10090 GN=Rsl1d1 PE=2 SV=1	27.642	24	8	8	8	1	465	51.9	9.98	16.55	8
High	P32067	Lupus La protein homolog OS=Mus musculus OX=10090 GN=Ssb PE=1 SV=1	27.543	24	9	10	9	1	415	47.7	9.77	17.92	9
High	P97477-2	Isoform 2 of Aurora kinase A OS=Mus musculus OX=10090 GN=Aurka	27.403	26	8	8	8	1	417	47.1	9.36	12.92	8
High	Q9QWL7	Keratin, type I cytoskeletal 17 OS=Mus musculus OX=10090 GN=Krt17 PE=1 SV=3	27.396	26	12	17	4	1	433	48.1	5.06	33.77	12
High	B2RY56	RNA-binding protein 25 OS=Mus musculus OX=10090 GN=Rbm25 PE=1 SV=2	27.336	16	11	12	11	1	838	99.5	6.32	21.76	11
High	A0A140T8T4	60S ribosomal protein L9 OS=Mus musculus OX=10090 GN=Rpl9-ps6 PE=3 SV=1	27.302	49	8	11	8	1	192	21.8	9.88	29.17	8
High	P62918	60S ribosomal protein L8 OS=Mus musculus OX=10090 GN=Rpl8 PE=1 SV=2	26.811	39	8	9	8	1	257	28	11.03	24.86	8
High	A0A2I3BRL8	Predicted gene 7324 OS=Mus musculus OX=10090 GN=Gm7324 PE=4 SV=1	26.667	25	10	13	2	1	388	42.2	9.99	25.27	10
High	Q08288	Cell growth-regulating nucleolar protein OS=Mus musculus OX=10090 GN=Lyar PE=1 SV=2	26.546	26	8	8	8	1	388	43.7	9.5	10.05	8
High	Q3UW40	TRASH domain-containing protein OS=Mus musculus OX=10090 GN=Rpl24 PE=2 SV=1	26.164	30	6	14	6	1	160	18.2	11.05	32.18	6
High	Q9DB79	40S ribosomal protein S11 OS=Mus musculus OX=10090 GN=Rps11 PE=2 SV=1	26.042	45	10	14	10	1	166	19.4	10.14	29.78	10
High	P51881	ADP/ATP translocase 2 OS=Mus musculus OX=10090 GN=Slc25a5 PE=1 SV=3	25.934	40	9	11	3	1	298	32.9	9.73	20.12	9
High	Q91V55	40S ribosomal protein S5 OS=Mus musculus OX=10090 GN=Rps5 PE=1 SV=1	25.725	33	6	8	6	1	204	22.9	9.72	24.4	6
High	A0A0R4J0R3	Interferon-stimulated 20 kDa exonuclease-like 2 OS=Mus musculus OX=10090 GN=Isg20l2 PE=1 SV=1	25.656	29	9	9	9	1	368	41	9.98	17.65	9
High	Q61164	Transcriptional repressor CTCF OS=Mus musculus OX=10090 GN=Ctcf PE=1 SV=2	25.503	16	9	9	9	1	736	83.7	6.9	11.36	9
High	O70569	Ribosomal protein S14 OS=Mus musculus OX=10090 GN=rps14 PE=3 SV=1	25.414	39	6	13	6	1	151	16.3	10.13	40.18	6
High	Q8BGZ7	Keratin, type II cytoskeletal 75 OS=Mus musculus OX=10090 GN=Krt75 PE=1 SV=1	25.37	17	11	17	1	1	551	59.7	8.31	37.89	11
High	Q3TI79	PUA domain-containing protein OS=Mus musculus OX=10090 GN=Dkc1 PE=2 SV=1	25.29	23	9	10	8	1	509	57.4	9.28	21.35	9
High	A2AM97	Ribosomal protein 10 OS=Mus musculus OX=10090 GN=RP23-436K3.4-001 PE=4 SV=1	25.199	33	5	6	5	1	214	24.6	10.08	18.66	5
High	P35980	60S ribosomal protein L18 OS=Mus musculus OX=10090 GN=Rpl18 PE=1 SV=3	25.187	43	9	15	9	1	188	21.6	11.78	32.15	9
High	Q542V3	Serine/arginine-rich-splicing factor 4 OS=Mus musculus OX=10090 GN=Srsf4 PE=1 SV=1	24.938	17	8	12	6	1	491	56.2	11.37	25.64	8
High	Q5BLJ7	40S ribosomal protein S13 OS=Mus musculus OX=10090 GN=Rps13 PE=1 SV=1	24.766	45	8	12	8	1	151	17.2	10.54	23.14	8
High	Q3UXP2	RuvB-like helicase OS=Mus musculus OX=10090 GN=Ruvbl2 PE=2 SV=1	24.488	20	8	9	8	1	463	51.1	5.64	19.22	8
High	Q5CZY9	Rps16 protein OS=Mus musculus OX=10090 GN=Rps16 PE=2 SV=1	24.47	50	9	18	9	1	172	19.3	10.2	34.33	9
High	Q9D554	Splicing factor 3A subunit 3 OS=Mus musculus OX=10090 GN=Sf3a3 PE=1 SV=2	24.422	18	8	9	8	1	501	58.8	5.34	16.08	8
High	A0A158SIT8	Modulator of non-genomic activity of estrogen receptor OS=Mus musculus OX=10090 GN=Pelp1 PE=3 SV=1	24.294	9	7	9	7	1	1123	118	4.36	20.5	7
High	Q80ZM5	H1 histone family, member X OS=Mus musculus OX=10090 GN=H1f10 PE=1 SV=1	24.208	27	6	16	6	1	188	20.1	11.22	34.69	6
High	Q8R0K4	Coiled-coil domain-containing protein 137 OS=Mus musculus OX=10090 GN=Ccdc137 PE=2 SV=1	24.124	38	9	10	9	1	290	32.9	10.68	20.67	9
High	Q8VDM6	Heterogeneous nuclear ribonucleoprotein U-like protein 1 OS=Mus musculus OX=10090 GN=Hnrnpul1 PE=1 SV=1	23.51	14	9	10	9	1	859	95.9	6.58	20.5	9
High	Q99KG3	RNA-binding protein 10 OS=Mus musculus OX=10090 GN=Rbm10 PE=1 SV=1	22.987	11	9	9	9	1	930	103.4	5.92	11.74	9
High	Q9WV02	RNA-binding motif protein, X chromosome OS=Mus musculus OX=10090 GN=Rbmx PE=1 SV=1	22.849	23	9	11	1	1	391	42.3	10.05	21.22	9
High	P14733	Lamin-B1 OS=Mus musculus OX=10090 GN=Lmnb1 PE=1 SV=3	22.624	15	9	9	8	1	588	66.7	5.16	10.49	9
High	Q60972	Histone-binding protein RBBP4 OS=Mus musculus OX=10090 GN=Rbbp4 PE=1 SV=5	22.469	24	8	10	4	1	425	47.6	4.89	17.59	8
High	Q9Z2D6-2	Isoform B of Methyl-CpG-binding protein 2 OS=Mus musculus OX=10090 GN=Mecp2	22.463	15	6	8	6	1	501	53.5	9.88	19.68	6
High	P62717	60S ribosomal protein L18a OS=Mus musculus OX=10090 GN=Rpl18a PE=1 SV=1	22.426	47	9	16	9	1	176	20.7	10.71	28.89	9
High	Q8CH18	Cell division cycle and apoptosis regulator protein 1 OS=Mus musculus OX=10090 GN=Ccar1 PE=1 SV=1	22.408	12	13	13	13	1	1146	132	5.76	12.72	13
High	Q9WVM1	Rac GTPase-activating protein 1 OS=Mus musculus OX=10090 GN=Racgap1 PE=1 SV=1	22.227	20	11	11	11	1	628	70.1	8.51	21.52	11
High	H7BX95	Serine/arginine-rich splicing factor 1 OS=Mus musculus OX=10090 GN=Srsf1 PE=1 SV=1	22.124	32	9	13	9	1	253	28.3	10.08	26.86	9
High	P63015-2	Isoform 5a of Paired box protein Pax-6 OS=Mus musculus OX=10090 GN=Pax6	21.857	20	9	9	9	1	436	48.2	9.14	15.88	9
High	Q3TIQ2	60S ribosomal protein L12 OS=Mus musculus OX=10090 GN=Rpl12 PE=2 SV=1	21.826	45	5	8	5	1	165	17.8	9.42	21.46	5
High	Q8K2T8	RNA polymerase II-associated factor 1 homolog OS=Mus musculus OX=10090 GN=Paf1 PE=1 SV=1	21.717	20	9	10	9	1	535	60.5	4.65	20.93	9
High	B2CY77	Laminin receptor (Fragment) OS=Mus musculus OX=10090 GN=Rpsa PE=2 SV=1	21.711	26	5	7	5	1	295	32.8	4.87	23.41	5
High	A0A1Y7VKY1	40S ribosomal protein S18 OS=Mus musculus OX=10090 GN=Rps18-ps5 PE=3 SV=1	21.597	43	7	12	7	1	152	17.7	10.86	29.01	7
High	Q6NXH9	Keratin, type II cytoskeletal 73 OS=Mus musculus OX=10090 GN=Krt73 PE=1 SV=1	21.251	9	6	22	1	1	539	58.9	8.09	52.51	6
High	Q5BKP5	RNA helicase OS=Mus musculus OX=10090 GN=Ddx50 PE=2 SV=1	21.223	16	8	8	8	1	734	82.1	9.17	11.86	8
High	Q9CXK9	RNA-binding protein 33 OS=Mus musculus OX=10090 GN=Rbm33 PE=1 SV=2	21.176	11	9	9	9	1	1231	137.2	6.46	14.52	9
High	A0A6Q6PUT5	Pre-mRNA-processing factor 40 homolog A (Fragment) OS=Mus musculus OX=10090 GN=Prpf40a PE=1 SV=1	21.029	11	7	8	7	1	966	109.8	8.12	10.47	7
High	Q9CR57	60S ribosomal protein L14 OS=Mus musculus OX=10090 GN=Rpl14 PE=1 SV=3	20.888	35	7	10	7	1	217	23.5	11.02	19.56	7
High	Q99KC3	Nop2 protein OS=Mus musculus OX=10090 GN=Nop2 PE=2 SV=1	20.881	25	6	10	1	1	432	46.8	9.99	15.32	6
High	Q3UKJ7	WD40 repeat-containing protein SMU1 OS=Mus musculus OX=10090 GN=Smu1 PE=2 SV=2	20.844	16	8	10	8	1	513	57.5	7.18	18.65	8
High	Q6NV83	U2 snRNP-associated SURP motif-containing protein OS=Mus musculus OX=10090 GN=U2surp PE=1 SV=3	20.626	12	11	12	11	1	1029	118.2	8.47	14.05	11
High	P48962	ADP/ATP translocase 1 OS=Mus musculus OX=10090 GN=Slc25a4 PE=1 SV=4	20.508	35	8	9	2	1	298	32.9	9.72	15.31	8
High	P62996	Transformer-2 protein homolog beta OS=Mus musculus OX=10090 GN=Tra2b PE=1 SV=1	20.467	28	6	6	5	1	288	33.6	11.25	16.03	6
High	Q9ESX4	Nucleolar protein of 40 kDa OS=Mus musculus OX=10090 GN=Zcchc17 PE=1 SV=1	20.401	27	5	5	5	1	241	27.5	9.63	13.65	5
High	Q6PE01	U5 small nuclear ribonucleoprotein 40 kDa protein OS=Mus musculus OX=10090 GN=Snrnp40 PE=1 SV=1	20.375	32	6	11	6	1	358	39.3	8.1	23.05	6
High	P08730	Keratin, type I cytoskeletal 13 OS=Mus musculus OX=10090 GN=Krt13 PE=1 SV=2	20.365	16	9	17	1	1	437	47.7	4.86	35.27	9
High	Q8BL97	Serine/arginine-rich splicing factor 7 OS=Mus musculus OX=10090 GN=Srsf7 PE=1 SV=1	20.347	26	8	12	7	1	267	30.8	11.9	27.51	8
High	Q3UJI2	WD_REPEATS_REGION domain-containing protein OS=Mus musculus OX=10090 GN=Rbbp7 PE=2 SV=1	20.295	26	8	9	4	1	425	47.7	5.05	12.31	8
High	Q3U7D2	Ribosomal protein L15 OS=Mus musculus OX=10090 GN=Rpl15 PE=2 SV=1	20.163	35	7	7	7	1	204	24.1	11.62	17.81	7
High	H3BL37	Treacle protein OS=Mus musculus OX=10090 GN=Tcof1 PE=1 SV=1	19.76	7	8	8	7	1	1356	138.5	9.26	10.62	8
High	Q3UMU9-3	Isoform 3 of Hepatoma-derived growth factor-related protein 2 OS=Mus musculus OX=10090 GN=Hdgfl2	19.619	14	7	8	7	1	678	75.2	8.59	10.8	7
High	Q8R5K4	Nucleolar protein 6 OS=Mus musculus OX=10090 GN=Nol6 PE=2 SV=2	19.521	9	8	8	8	1	1152	129.1	6.79	10.66	8
High	E9Q557	Desmoplakin OS=Mus musculus OX=10090 GN=Dsp PE=1 SV=1	19.333	3	8	8	8	1	2883	332.7	6.8	11.2	8
High	P62983	Ubiquitin-40S ribosomal protein S27a OS=Mus musculus OX=10090 GN=Rps27a PE=1 SV=2	19.061	43	5	6	2	1	156	17.9	9.64	16.74	5
High	Q544R5	TAR DNA-binding protein 43 OS=Mus musculus OX=10090 GN=Tardbp PE=1 SV=1	19.031	17	6	6	6	1	414	44.5	6.7	15.18	6
High	P61358	60S ribosomal protein L27 OS=Mus musculus OX=10090 GN=Rpl27 PE=1 SV=2	19.021	46	6	8	6	1	136	15.8	10.56	18.77	6
High	Q9D8S5	Serine/arginine-rich-splicing factor 5 OS=Mus musculus OX=10090 GN=Srsf5 PE=1 SV=1	18.93	25	6	9	5	1	270	31	11.56	18.99	6
High	Q3V1H1	Cytoskeleton-associated protein 2 OS=Mus musculus OX=10090 GN=Ckap2 PE=1 SV=1	18.899	17	9	9	9	1	664	74	9.23	13.75	9
High	Q9EPU0	Regulator of nonsense transcripts 1 OS=Mus musculus OX=10090 GN=Upf1 PE=1 SV=2	18.862	9	9	9	9	1	1124	123.9	6.61	6.3	9
High	O09167	60S ribosomal protein L21 OS=Mus musculus OX=10090 GN=Rpl21 PE=1 SV=3	18.856	28	3	9	3	1	160	18.6	10.49	24.9	3
High	E9QP00	Transformer-2 protein homolog alpha OS=Mus musculus OX=10090 GN=Tra2a PE=1 SV=1	18.596	19	4	6	3	1	282	32.6	11.27	18.75	4
High	C0HKD9	Microfibrillar-associated protein 1B OS=Mus musculus OX=10090 GN=Mfap1b PE=1 SV=1	18.469	18	5	5	5	1	439	51.9	4.98	12.47	5
High	P97868	E3 ubiquitin-protein ligase RBBP6 OS=Mus musculus OX=10090 GN=Rbbp6 PE=1 SV=5	18.33	5	7	7	7	1	1790	199.5	9.63	16.72	7
High	Q9CQR2	40S ribosomal protein S21 OS=Mus musculus OX=10090 GN=Rps21 PE=1 SV=1	18.316	48	4	4	4	1	83	9.1	8.51	12.33	4
High	Q9CQK2	40S ribosomal protein S24 OS=Mus musculus OX=10090 GN=Rps24 PE=2 SV=1	17.985	35	5	11	5	1	134	15.5	10.8	26.65	5
High	G3X8T2	Zinc finger CCCH domain-containing protein 18 OS=Mus musculus OX=10090 GN=Zc3h18 PE=1 SV=1	17.867	11	6	8	6	1	972	108.2	8	12.57	6
High	A2BE28	Ribosomal biogenesis protein LAS1L OS=Mus musculus OX=10090 GN=Las1l PE=1 SV=1	17.805	10	6	6	6	1	776	89.4	4.44	11.76	6
High	P63325	40S ribosomal protein S10 OS=Mus musculus OX=10090 GN=Rps10 PE=1 SV=1	17.798	45	7	11	7	1	165	18.9	10.15	19.82	7
High	Q8CH25	SAFB-like transcription modulator OS=Mus musculus OX=10090 GN=Sltm PE=1 SV=1	17.731	9	9	10	9	1	1031	116.9	7.72	10.35	9
High	Q02257	Junction plakoglobin OS=Mus musculus OX=10090 GN=Jup PE=1 SV=3	17.716	9	6	6	6	1	745	81.7	6.14	9.43	6
High	Q5I0T8	Ribosomal protein L19 OS=Mus musculus OX=10090 GN=Rpl19 PE=1 SV=1	17.692	23	6	12	6	1	196	23.5	11.47	24.61	6
High	E9Q317	18 kDa Sin3-associated polypeptide OS=Mus musculus OX=10090 GN=Sap18 PE=1 SV=1	17.674	35	7	8	7	1	172	19.6	9.8	15.38	7
High	Q4FZH2	Ribosomal protein L26 OS=Mus musculus OX=10090 GN=Rpl26 PE=1 SV=1	17.592	44	8	15	8	1	145	17.2	10.55	27.44	8
High	P62960	Y-box-binding protein 1 OS=Mus musculus OX=10090 GN=Ybx1 PE=1 SV=3	17.542	26	6	7	6	1	322	35.7	9.88	14.74	6
High	Q5SUF2-2	Isoform 2 of Luc7-like protein 3 OS=Mus musculus OX=10090 GN=Luc7l3	17.347	13	5	5	5	1	491	58.4	9.95	7.48	5
High	A0A1Y7VNZ6	Non-specific serine/threonine protein kinase OS=Mus musculus OX=10090 GN=Mark3 PE=1 SV=1	17.341	9	7	9	1	1	797	88.8	9.38	14.09	7
High	B2RQQ5	Microtubule-associated protein 1B OS=Mus musculus OX=10090 GN=Map1b PE=2 SV=1	17.194	4	7	7	7	1	2464	270.1	4.83	7.43	7
High	P23116	Eukaryotic translation initiation factor 3 subunit A OS=Mus musculus OX=10090 GN=Eif3a PE=1 SV=5	17.185	6	8	8	8	1	1344	161.8	6.77	10.08	8
High	Q6PHQ9	Polyadenylate-binding protein OS=Mus musculus OX=10090 GN=Pabpc4 PE=1 SV=1	17.115	13	8	9	2	1	660	72.2	9.39	15.38	8
High	Q91YR7	Pre-mRNA-processing factor 6 OS=Mus musculus OX=10090 GN=Prpf6 PE=1 SV=1	16.97	9	7	7	7	1	941	106.7	8.09	13.16	7
High	Q3UV17	Keratin, type II cytoskeletal 2 oral OS=Mus musculus OX=10090 GN=Krt76 PE=1 SV=1	16.935	11	8	11	3	1	594	62.8	8.43	12.51	8
High	P84104	Serine/arginine-rich splicing factor 3 OS=Mus musculus OX=10090 GN=Srsf3 PE=1 SV=1	16.865	32	5	8	4	1	164	19.3	11.65	16.7	5
High	D3Z0M9	RNA helicase OS=Mus musculus OX=10090 GN=Ddx23 PE=1 SV=1	16.856	12	9	9	9	1	819	95.4	9.58	4.91	9
High	Q8C2Q7	Heterogeneous nuclear ribonucleoprotein H OS=Mus musculus OX=10090 GN=Hnrnph1 PE=1 SV=1	16.778	23	7	7	6	1	472	51.2	6.8	12.86	7
High	Q58E35	Ribosomal protein, large, P1 OS=Mus musculus OX=10090 GN=Rplp1 PE=1 SV=1	16.547	53	3	4	3	1	114	11.5	4.32	18.12	3
High	Q6DFW4	Nucleolar protein 58 OS=Mus musculus OX=10090 GN=Nop58 PE=1 SV=1	16.448	11	5	5	5	1	536	60.3	8.34	11.03	5
High	P83870	PHD finger-like domain-containing protein 5A OS=Mus musculus OX=10090 GN=Phf5a PE=1 SV=1	16.276	61	6	6	6	1	110	12.4	8.41	9.9	6
High	Q8C671	Serine/arginine-rich splicing factor 2 OS=Mus musculus OX=10090 GN=Srsf2 PE=2 SV=1	16.27	13	4	6	4	1	254	29	11.22	16.29	4
High	Q9CY57	Chromatin target of PRMT1 protein OS=Mus musculus OX=10090 GN=Chtop PE=1 SV=2	16.268	17	3	7	3	1	249	26.6	12.23	20.81	3
High	P62317	Small nuclear ribonucleoprotein Sm D2 OS=Mus musculus OX=10090 GN=Snrpd2 PE=1 SV=1	16.165	41	4	9	4	1	118	13.5	9.91	25.82	4
High	Q5BLK2	40S ribosomal protein S20 OS=Mus musculus OX=10090 GN=Rps20 PE=1 SV=1	16.102	29	5	7	5	1	119	13.4	9.94	17.63	5
High	A0A087WP92	E3 ubiquitin-protein ligase TRIP12 (Fragment) OS=Mus musculus OX=10090 GN=Trip12 PE=1 SV=1	15.749	21	5	6	1	1	423	44.8	11.03	11.35	5
High	Q5XJE5	RNA polymerase-associated protein LEO1 OS=Mus musculus OX=10090 GN=Leo1 PE=1 SV=2	15.666	10	4	4	4	1	667	75.6	4.46	12.57	4
High	Q52KI8	Serine/arginine repetitive matrix protein 1 OS=Mus musculus OX=10090 GN=Srrm1 PE=1 SV=2	15.38	9	5	6	5	1	946	106.8	11.87	14.84	5
High	A0A097PUG4	Anti-lox-1 15C4 light chain OS=Mus musculus OX=10090 PE=2 SV=1	15.184	30	4	5	4	1	238	25.9	4.94	14.41	4
High	Q4VAG4	Ribosomal protein L22 OS=Mus musculus OX=10090 GN=Rpl22 PE=1 SV=1	15.07	39	3	5	3	1	128	14.8	9.19	10.98	3
High	Q3THW7	Eukaryotic translation initiation factor 3 subunit H OS=Mus musculus OX=10090 GN=Eif3h PE=2 SV=1	14.896	18	5	7	5	1	352	39.8	6.54	10.78	5
High	C0HKE5	Histone H2A type 1-G OS=Mus musculus OX=10090 GN=H2ac11 PE=1 SV=1	14.862	35	5	8	3	1	130	14.1	11.05	15.58	5
High	Q3UYX6	RRM domain-containing protein OS=Mus musculus OX=10090 GN=Srsf10 PE=2 SV=1	14.82	17	5	5	5	1	278	33.1	11.09	11.82	5
High	Q99MR6	Serrate RNA effector molecule homolog OS=Mus musculus OX=10090 GN=Srrt PE=1 SV=1	14.798	6	5	5	5	1	875	100.4	5.97	8.07	5
High	Q4VBE8	WD repeat-containing protein 18 OS=Mus musculus OX=10090 GN=Wdr18 PE=1 SV=1	14.637	15	5	6	5	1	431	47.2	6.89	11.2	5
High	P08775	DNA-directed RNA polymerase II subunit RPB1 OS=Mus musculus OX=10090 GN=Polr2a PE=1 SV=3	14.594	4	6	6	6	1	1970	217	7.37	8.55	6
High	A0A068BFS0	WD repeat domain 46 OS=Mus musculus OX=10090 GN=Wdr46 PE=2 SV=1	14.456	8	4	4	4	1	622	69	9.82	6.93	4
High	Q8QZY1	Eukaryotic translation initiation factor 3 subunit L OS=Mus musculus OX=10090 GN=Eif3l PE=1 SV=1	14.301	8	4	4	4	1	564	66.6	6.44	9.36	4
High	Q9CQI7	U2 small nuclear ribonucleoprotein B'' OS=Mus musculus OX=10090 GN=Snrpb2 PE=1 SV=1	14.183	29	5	7	5	1	225	25.3	9.72	12.03	5
High	A0A0B4J1E2	SNW domain-containing protein 1 OS=Mus musculus OX=10090 GN=Snw1 PE=1 SV=1	14.177	13	6	6	6	1	536	61.4	9.48	11.8	6
High	P14115	60S ribosomal protein L27a OS=Mus musculus OX=10090 GN=Rpl27a PE=1 SV=5	14.166	28	5	7	5	1	148	16.6	11.12	19.05	5
High	Q8BJ05	Zinc finger CCCH domain-containing protein 14 OS=Mus musculus OX=10090 GN=Zc3h14 PE=1 SV=1	14.057	10	5	5	5	1	735	82.4	7.37	9.39	5
High	Q99LX5	Multiple myeloma tumor-associated protein 2 homolog OS=Mus musculus OX=10090 GN=Mmtag2 PE=2 SV=1	14.023	20	5	5	5	1	260	29.3	9.86	9.41	5
High	Q6ZWN5	40S ribosomal protein S9 OS=Mus musculus OX=10090 GN=Rps9 PE=1 SV=3	13.961	34	8	10	8	1	194	22.6	10.65	19.87	8
High	Q3UTJ2-2	Isoform 2 of Sorbin and SH3 domain-containing protein 2 OS=Mus musculus OX=10090 GN=Sorbs2	13.958	6	7	8	7	1	1295	144.9	8.27	8.38	7
High	Q61782	Type I epidermal keratin mRNA, 3'end (Fragment) OS=Mus musculus OX=10090 PE=2 SV=1	13.947	47	4	6	1	1	93	10.7	6.3	14.14	4
High	A0A0A6YX26	60S ribosomal protein L31 OS=Mus musculus OX=10090 GN=Rpl31 PE=1 SV=1	13.836	31	5	7	5	1	129	15	10.61	14.19	5
High	Q3UEB3-2	Isoform 2 of Poly(U)-binding-splicing factor PUF60 OS=Mus musculus OX=10090 GN=Puf60	13.823	12	5	6	5	1	547	58.5	5.35	10.09	5
High	P63163	Small nuclear ribonucleoprotein-associated protein N OS=Mus musculus OX=10090 GN=Snrpn PE=1 SV=1	13.676	15	4	7	4	1	240	24.6	11.19	18.36	4
High	O09106	Histone deacetylase 1 OS=Mus musculus OX=10090 GN=Hdac1 PE=1 SV=1	13.64	15	6	6	3	1	482	55	5.48	13.59	6
High	Q64511	DNA topoisomerase 2-beta OS=Mus musculus OX=10090 GN=Top2b PE=1 SV=2	13.496	4	6	6	1	1	1612	181.8	8.29	5.93	6
High	Q9D903	Probable rRNA-processing protein EBP2 OS=Mus musculus OX=10090 GN=Ebna1bp2 PE=2 SV=1	13.431	25	7	8	7	1	306	34.7	10.08	6.71	7
High	Q60737	Casein kinase II subunit alpha OS=Mus musculus OX=10090 GN=Csnk2a1 PE=1 SV=2	13.295	17	5	5	5	1	391	45.1	7.74	7.24	5
High	Q91WT8	RNA-binding protein 47 OS=Mus musculus OX=10090 GN=Rbm47 PE=1 SV=1	13.245	10	5	5	5	1	590	64	8.19	9.01	5
High	B1AVB1	Scm polycomb group protein-like 2 OS=Mus musculus OX=10090 GN=Scml2 PE=1 SV=1	13.23	10	5	6	5	1	825	89.5	9.23	8.9	5
High	Q61687	Transcriptional regulator ATRX OS=Mus musculus OX=10090 GN=Atrx PE=1 SV=3	13.164	3	5	5	5	1	2476	278.4	6.68	6.71	5
High	A2RS68	U1 small nuclear ribonucleoprotein 70 kDa OS=Mus musculus OX=10090 GN=Snrnp70 PE=2 SV=1	13.141	17	7	7	7	1	448	52	9.94	7.52	7
High	E9QNP0	60S ribosomal protein L40 OS=Mus musculus OX=10090 GN=Kxd1 PE=1 SV=1	12.944	19	4	7	1	1	232	26.8	9.83	12.36	4
High	Q80X50-5	Isoform 5 of Ubiquitin-associated protein 2-like OS=Mus musculus OX=10090 GN=Ubap2l	12.828	6	5	6	5	1	1112	117.3	7.12	7.9	5
High	G3UVU2	Splicing factor 3A subunit 2 OS=Mus musculus OX=10090 GN=Sf3a2 PE=1 SV=1	12.821	17	6	7	6	1	485	51.2	9.64	10.06	6
High	H9KV00	Protein SON OS=Mus musculus OX=10090 GN=Son PE=1 SV=1	12.807	4	7	7	7	1	2477	268.7	5.71	5.81	7
High	P61327	Protein mago nashi homolog OS=Mus musculus OX=10090 GN=Magoh PE=2 SV=1	12.789	30	5	5	5	1	146	17.2	6.11	12.1	5
High	Q922V4	Pleiotropic regulator 1 OS=Mus musculus OX=10090 GN=Plrg1 PE=1 SV=1	12.744	16	6	6	6	1	513	56.9	9.17	8.22	6
High	Q5M9J8	60S ribosomal protein L28 OS=Mus musculus OX=10090 GN=Rpl28 PE=1 SV=1	12.669	34	5	9	5	1	137	15.7	12.02	19.43	5
High	Q6NS46	Protein RRP5 homolog OS=Mus musculus OX=10090 GN=Pdcd11 PE=1 SV=2	12.593	5	8	8	8	1	1862	207.6	8.75	6.44	8
High	Q8CFI7	DNA-directed RNA polymerase II subunit RPB2 OS=Mus musculus OX=10090 GN=Polr2b PE=1 SV=2	12.593	6	6	6	6	1	1174	133.8	6.87	6.61	6
High	Q5RJV5	Polypyrimidine tract-binding protein 1 OS=Mus musculus OX=10090 GN=Ptbp1 PE=2 SV=1	12.462	13	5	6	3	1	555	59.2	9.25	9.05	5
High	A0A1W2P7A1	40S ribosomal protein S12 OS=Mus musculus OX=10090 GN=Rps12 PE=1 SV=1	12.419	28	4	6	4	1	148	16	8.16	16.12	4
High	A0A0R4J036	160 kDa neurofilament protein OS=Mus musculus OX=10090 GN=Nefm PE=1 SV=1	12.339	5	2	2	2	1	848	95.9	4.78	4.33	2
High	P19001	Keratin, type I cytoskeletal 19 OS=Mus musculus OX=10090 GN=Krt19 PE=1 SV=1	12.318	19	8	12	2	1	403	44.5	5.39	20.38	8
High	Q5DTP7	DNA helicase (Fragment) OS=Mus musculus OX=10090 GN=Chd4 PE=2 SV=1	12.266	3	5	5	5	1	1945	220.8	5.94	5.92	5
High	A2AR02	Peptidyl-prolyl cis-trans isomerase G OS=Mus musculus OX=10090 GN=Ppig PE=1 SV=1	12.257	11	6	6	6	1	752	88.3	10.27	9.14	6
High	Q8R326	Paraspeckle component 1 OS=Mus musculus OX=10090 GN=Pspc1 PE=1 SV=1	12.237	11	5	7	5	1	523	58.7	6.67	8.73	5
High	Q497N1	40S ribosomal protein S26 OS=Mus musculus OX=10090 GN=Rps26 PE=1 SV=1	12.175	31	3	3	3	1	115	13	11	7.1	3
High	Q5SXC4	Vascular endothelial zinc finger 1 OS=Mus musculus OX=10090 GN=Vezf1 PE=1 SV=1	12.069	13	6	6	6	1	518	56.5	9.57	7.05	6
High	Q569Z5	Probable ATP-dependent RNA helicase DDX46 OS=Mus musculus OX=10090 GN=Ddx46 PE=1 SV=2	12.011	5	5	5	5	1	1032	117.4	9.26	7.62	5
High	G3UW85	Enhancer of rudimentary homolog OS=Mus musculus OX=10090 GN=Erh PE=1 SV=1	11.927	28	3	3	3	1	123	14.3	5.54	7.47	3
High	Q6PGH1	Protein BUD31 homolog OS=Mus musculus OX=10090 GN=Bud31 PE=1 SV=2	11.908	33	5	5	5	1	144	17	8.82	8.76	5
High	E9QML5	Zinc finger protein 638 OS=Mus musculus OX=10090 GN=Zfp638 PE=1 SV=2	11.81	3	6	6	6	1	1960	218	6.89	1.99	6
High	Q9EP97	Sentrin-specific protease 3 OS=Mus musculus OX=10090 GN=Senp3 PE=1 SV=1	11.804	9	4	5	4	1	568	64.4	8.75	8.4	4
High	Q6ZWU9	40S ribosomal protein S27 OS=Mus musculus OX=10090 GN=Rps27 PE=1 SV=3	11.788	40	5	6	3	1	84	9.5	9.45	9.65	5
High	O55135	Eukaryotic translation initiation factor 6 OS=Mus musculus OX=10090 GN=Eif6 PE=1 SV=2	11.774	28	4	4	4	1	245	26.5	4.74	7.99	4
High	B2RTE3	Pre-mRNA-splicing factor 38A OS=Mus musculus OX=10090 GN=Prpf38a PE=2 SV=1	11.746	14	4	4	4	1	312	37.4	10.01	9.14	4
High	P57784	U2 small nuclear ribonucleoprotein A' OS=Mus musculus OX=10090 GN=Snrpa1 PE=1 SV=2	11.663	19	4	4	4	1	255	28.3	8.62	9.12	4
High	P27661	Histone H2AX OS=Mus musculus OX=10090 GN=H2ax PE=1 SV=2	11.601	27	3	5	1	1	143	15.1	10.74	11.77	3
High	B9EKC5	Calcineurin binding protein 1 OS=Mus musculus OX=10090 GN=Cabin1 PE=2 SV=1	11.543	3	7	7	7	1	2187	243.1	6.01	6.14	7
High	Q5M9L1	60S ribosomal protein L36 OS=Mus musculus OX=10090 GN=Rpl36 PE=2 SV=1	11.484	30	4	8	4	1	105	12.3	11.59	20.89	4
High	P63168	Dynein light chain 1, cytoplasmic OS=Mus musculus OX=10090 GN=Dynll1 PE=1 SV=1	11.27	26	3	3	3	1	89	10.4	7.4	5.53	3
High	Q6ZWY3	40S ribosomal protein S27-like OS=Mus musculus OX=10090 GN=Rps27l PE=1 SV=3	11.262	39	4	7	2	1	84	9.5	9.45	11.94	4
High	Q3U8M3	Uncharacterized protein OS=Mus musculus OX=10090 GN=Rpl37a PE=2 SV=1	11.25	39	3	4	3	1	97	10.7	10.67	7.86	3
High	Q9R226	KH domain-containing, RNA-binding, signal transduction-associated protein 3 OS=Mus musculus OX=10090 GN=Khdrbs3 PE=1 SV=1	11.242	9	4	4	4	1	346	38.8	8.1	10.17	4
High	Q9CXK8	60S ribosome subunit biogenesis protein NIP7 homolog OS=Mus musculus OX=10090 GN=Nip7 PE=1 SV=1	11.213	24	3	3	3	1	180	20.4	8.24	5.7	3
High	A0A1B0GS68	60S ribosomal protein L13a OS=Mus musculus OX=10090 GN=Gm45713 PE=2 SV=1	11.074	9	4	6	4	1	446	50.8	10.23	16.19	4
High	P24788	Cyclin-dependent kinase 11B OS=Mus musculus OX=10090 GN=Cdk11b PE=1 SV=2	11.073	6	4	4	4	1	784	91.5	5.39	4.33	4
High	A0MNP4	CDW13/WDR61 OS=Mus musculus OX=10090 GN=Wdr61 PE=1 SV=1	11.057	14	3	4	3	1	305	33.8	5.36	10.47	3
High	Q69Z61	PWWP domain-containing protein 2A OS=Mus musculus OX=10090 GN=Pwwp2a PE=2 SV=2	10.997	8	5	5	5	1	730	79.3	9.28	10	5
High	P62911	60S ribosomal protein L32 OS=Mus musculus OX=10090 GN=Rpl32 PE=1 SV=2	10.972	27	3	4	3	1	135	15.9	11.33	9.13	3
High	Q9WVA3	Mitotic checkpoint protein BUB3 OS=Mus musculus OX=10090 GN=Bub3 PE=1 SV=2	10.756	16	4	4	4	1	326	36.9	6.84	9.78	4
High	P62320	Small nuclear ribonucleoprotein Sm D3 OS=Mus musculus OX=10090 GN=Snrpd3 PE=1 SV=1	10.741	24	2	2	2	1	126	13.9	10.32	7.15	2
High	Q7TNV0	Protein DEK OS=Mus musculus OX=10090 GN=Dek PE=1 SV=1	10.499	13	5	6	5	1	380	43.1	6.86	10.42	5
High	Q9DBE9	pre-rRNA 2'-O-ribose RNA methyltransferase FTSJ3 OS=Mus musculus OX=10090 GN=Ftsj3 PE=1 SV=1	10.462	3	2	2	2	1	838	95.5	8.38	3.93	2
High	A0A0U1RNL9	Myc-associated zinc finger protein OS=Mus musculus OX=10090 GN=Maz PE=1 SV=1	10.413	7	2	3	2	1	493	51.2	9.1	5.87	2
High	B2RRT9	Zinc finger Ran-binding domain-containing protein 2 OS=Mus musculus OX=10090 GN=Zranb2 PE=1 SV=1	10.399	12	4	4	4	1	330	37.3	9.89	7.38	4
High	P11031	Activated RNA polymerase II transcriptional coactivator p15 OS=Mus musculus OX=10090 GN=Sub1 PE=1 SV=3	10.393	27	3	5	3	1	127	14.4	9.6	12.99	3
High	Q3ULC7	RNA helicase OS=Mus musculus OX=10090 GN=Ddx21 PE=2 SV=1	10.357	7	6	7	6	1	851	93.5	9.09	5.96	6
High	P62305	Small nuclear ribonucleoprotein E OS=Mus musculus OX=10090 GN=Snrpe PE=1 SV=1	10.293	52	3	4	3	1	92	10.8	9.44	7.33	3
High	Q3UYV9	Nuclear cap-binding protein subunit 1 OS=Mus musculus OX=10090 GN=Ncbp1 PE=1 SV=2	10.233	9	5	5	5	1	790	91.9	6.64	4.19	5
High	Q9D8M4	60S ribosomal protein L7-like 1 OS=Mus musculus OX=10090 GN=Rpl7l1 PE=1 SV=1	10.222	20	4	4	4	1	246	28.5	10.64	6.92	4
High	Q9JJI8	60S ribosomal protein L38 OS=Mus musculus OX=10090 GN=Rpl38 PE=1 SV=3	10.188	49	4	7	4	1	70	8.2	10.1	6.31	4
High	A0A4E9FSP6	IgL2 (Fragment) OS=Mus musculus OX=10090 GN=IGLC2 PE=4 SV=1	10.128	33	2	2	2	1	92	9.9	6.51	6.38	2
High	Q4G5Y4	Endothelial differentiation inhibitory protein D18 OS=Mus musculus OX=10090 GN=Brd3 PE=2 SV=1	10.088	6	4	4	3	1	726	79.7	9.39	8.91	4
High	G5E8I8	Calcium homeostasis endoplasmic reticulum protein OS=Mus musculus OX=10090 GN=Cherp PE=1 SV=2	10.063	6	6	6	6	1	949	107.6	9.33	7.62	6
High	Q792Z1	Trypsin 10 OS=Mus musculus OX=10090 GN=Try10 PE=1 SV=1	9.998	15	2	4	1	1	246	26.2	5.83	14.27	2
High	Q3THH1	Protein disulfide-isomerase A6 OS=Mus musculus OX=10090 GN=Pdia6 PE=2 SV=1	9.953	7	2	2	2	1	445	48.6	5.19	6.76	2
High	Q91Z49	UAP56-interacting factor OS=Mus musculus OX=10090 GN=Fyttd1 PE=1 SV=1	9.901	15	4	4	4	1	317	35.9	11.84	3.9	4
High	Q9QZQ8	Core histone macro-H2A.1 OS=Mus musculus OX=10090 GN=Macroh2a1 PE=1 SV=3	9.844	13	3	4	3	1	372	39.7	9.8	7.62	3
High	Q1W5W7	Integrase OS=Mus musculus OX=10090 GN=gag-pol PE=3 SV=1	9.834	5	5	6	3	1	1067	119.7	9.26	8.8	5
High	A0A286YDV7	Nucleolar and coiled-body phosphoprotein 1 (Fragment) OS=Mus musculus OX=10090 GN=Nolc1 PE=1 SV=1	9.738	7	4	4	4	1	702	73.6	9.36	6.23	4
High	Q3V2E0	Peptidase S1 domain-containing protein OS=Mus musculus OX=10090 GN=Try5 PE=2 SV=1	9.734	12	2	4	2	1	255	27.1	6.73	11.43	2
High	P62315	Small nuclear ribonucleoprotein Sm D1 OS=Mus musculus OX=10090 GN=Snrpd1 PE=1 SV=1	9.704	38	4	4	4	1	119	13.3	11.56	5.07	4
High	O55142	60S ribosomal protein L35a OS=Mus musculus OX=10090 GN=Rpl35a PE=1 SV=2	9.697	34	5	6	5	1	110	12.5	10.89	7.8	5
High	Q9D945	Protein LLP homolog OS=Mus musculus OX=10090 GN=Llph PE=1 SV=1	9.542	23	2	2	2	1	130	15.4	10.36	6.96	2
High	Q3URQ0	Testis-expressed protein 10 OS=Mus musculus OX=10090 GN=Tex10 PE=1 SV=1	9.364	8	6	6	6	1	928	105.1	9.16	6.15	6
High	P26369	Splicing factor U2AF 65 kDa subunit OS=Mus musculus OX=10090 GN=U2af2 PE=1 SV=3	9.322	9	4	4	4	1	475	53.5	9.09	5.85	4
High	Q3U0T7	Uncharacterized protein OS=Mus musculus OX=10090 GN=Sp2 PE=2 SV=1	9.274	6	3	4	3	1	613	64.9	9.88	4.27	3
High	A0A1S6GWH2	RNA helicase OS=Mus musculus OX=10090 GN=Ddx39b PE=2 SV=1	9.249	8	4	4	4	1	483	54.6	5.67	4.06	4
High	Q91YK2	Ribosomal RNA processing protein 1 homolog B OS=Mus musculus OX=10090 GN=Rrp1b PE=1 SV=2	9.116	10	5	5	5	1	724	80.5	9.72	0	5
High	P70372	ELAV-like protein 1 OS=Mus musculus OX=10090 GN=Elavl1 PE=1 SV=2	9.059	16	4	4	4	1	326	36.1	9.04	7.53	4
High	Q8BGC0	HIV Tat-specific factor 1 homolog OS=Mus musculus OX=10090 GN=Htatsf1 PE=1 SV=1	8.995	8	5	5	5	1	757	86.2	4.4	7.39	5
High	Q8C1D8	Protein IWS1 homolog OS=Mus musculus OX=10090 GN=Iws1 PE=1 SV=1	8.885	7	5	5	5	1	766	85.2	4.67	6.65	5
High	Q80U58	Pumilio homolog 2 OS=Mus musculus OX=10090 GN=Pum2 PE=1 SV=2	8.803	2	2	2	2	1	1066	114.2	7.08	3.88	2
High	Q62150	RNA-binding protein with serine-rich domain 1 OS=Mus musculus OX=10090 GN=Rnps1 PE=2 SV=1	8.732	9	3	4	3	1	365	40.9	10.81	12.86	3
High	P53569	CCAAT/enhancer-binding protein zeta OS=Mus musculus OX=10090 GN=Cebpz PE=1 SV=2	8.7	5	4	4	4	1	1052	120.2	5.74	4.16	4
High	Q91VE6	MKI67 FHA domain-interacting nucleolar phosphoprotein OS=Mus musculus OX=10090 GN=Nifk PE=1 SV=1	8.65	15	3	3	3	1	317	36.2	10.24	5.81	3
High	Q9D1R9	60S ribosomal protein L34 OS=Mus musculus OX=10090 GN=Rpl34 PE=1 SV=2	8.581	32	5	6	5	1	117	13.3	11.47	9.92	5
High	Q9D0T1	NHP2-like protein 1 OS=Mus musculus OX=10090 GN=Snu13 PE=1 SV=4	8.531	19	2	2	2	1	128	14.2	8.46	5.95	2
High	A2A7B5	PR domain-containing 2, with ZNF domain OS=Mus musculus OX=10090 GN=Prdm2 PE=1 SV=1	8.528	3	4	4	4	1	1709	187.1	8	1.8	4
High	Q059T9	PRP4 pre-mRNA processing factor 4 homolog (Yeast) OS=Mus musculus OX=10090 GN=Prpf4 PE=1 SV=1	8.496	11	4	4	4	1	521	58.3	7.28	4.57	4
High	Q9CWZ3	RNA-binding protein 8A OS=Mus musculus OX=10090 GN=Rbm8a PE=1 SV=4	8.458	26	4	4	1	1	174	19.9	5.72	4.58	4
High	A0A2R8VK76	Cleavage and polyadenylation-specificity factor subunit 1 OS=Mus musculus OX=10090 GN=Cpsf1 PE=1 SV=1	8.409	3	3	3	3	1	1450	161.7	6.58	2.53	3
High	Q3U5M2	Pre-mRNA-splicing factor SPF27 OS=Mus musculus OX=10090 GN=Bcas2 PE=2 SV=1	8.396	14	3	3	3	1	225	26.1	5.35	5.15	3
High	Q9JM93	ADP-ribosylation factor-like protein 6-interacting protein 4 OS=Mus musculus OX=10090 GN=Arl6ip4 PE=1 SV=1	8.379	18	3	3	3	1	229	25.5	11.19	6.61	3
High	P56959	RNA-binding protein FUS OS=Mus musculus OX=10090 GN=Fus PE=1 SV=1	8.312	8	3	3	3	1	518	52.6	9.36	6.51	3
High	M1VMF6	Metastasis-associated protein MTA1 isoform 9 OS=Mus musculus OX=10090 GN=Mta1 PE=2 SV=1	8.249	4	3	3	2	1	730	82.3	9.22	4.54	3
High	Q9CWZ3-2	Isoform 2 of RNA-binding protein 8A OS=Mus musculus OX=10090 GN=Rbm8a	8.239	25	4	4	1	1	173	19.7	5.92	4.58	4
High	Q925Q8	Dachshund homolog 2 OS=Mus musculus OX=10090 GN=Dach2 PE=1 SV=1	8.089	7	4	4	4	1	634	68.5	8.94	5.7	4
High	Q3TXM9	Uncharacterized protein OS=Mus musculus OX=10090 GN=Srsf9 PE=2 SV=1	8.037	18	4	4	4	1	222	25.7	8.65	6.31	4
High	E9Q5K9	YTH domain-containing protein 1 OS=Mus musculus OX=10090 GN=Ythdc1 PE=1 SV=2	8.026	7	4	4	4	1	736	85.6	6.16	8.52	4
High	A0A0N4SUH4	Pumilio homolog 3 OS=Mus musculus OX=10090 GN=Pum3 PE=1 SV=1	7.992	8	4	4	4	1	648	72.9	9.66	2.91	4
High	Q9Z315	U4/U6.U5 tri-snRNP-associated protein 1 OS=Mus musculus OX=10090 GN=Sart1 PE=1 SV=1	7.956	4	2	2	2	1	806	90.8	5.82	5.44	2
High	Q3UJL0	Nucleolar GTP-binding protein 2 OS=Mus musculus OX=10090 GN=Gnl2 PE=2 SV=1	7.813	7	4	4	4	1	728	83.3	9.16	4.93	4
High	Q5SQ20	Pescadillo homolog OS=Mus musculus OX=10090 GN=Pes1 PE=1 SV=1	7.801	6	4	4	4	1	588	68.2	6.84	5.45	4
High	Q8K203	Endonuclease 8-like 3 OS=Mus musculus OX=10090 GN=Neil3 PE=1 SV=1	7.776	9	4	4	4	1	606	67.4	9.01	4.17	4
High	Q80U76	Ribosome biogenesis regulatory protein (Fragment) OS=Mus musculus OX=10090 GN=Rrs1 PE=2 SV=2	7.747	7	3	3	3	1	373	42.3	10.87	5.62	3
High	Q8R1B4	Eukaryotic translation initiation factor 3 subunit C OS=Mus musculus OX=10090 GN=Eif3c PE=1 SV=1	7.747	6	5	5	5	1	911	105.5	5.78	3.97	5
High	Q3URN5	Uncharacterized protein OS=Mus musculus OX=10090 GN=Aatf PE=2 SV=1	7.659	9	4	4	4	1	526	59.4	4.94	5.86	4
High	Q9CZI5	40S ribosomal protein S23 OS=Mus musculus OX=10090 GN=Rps23 PE=2 SV=1	7.617	23	3	3	3	1	145	16	10.43	7.78	3
High	Q9D824	Pre-mRNA 3'-end-processing factor FIP1 OS=Mus musculus OX=10090 GN=Fip1l1 PE=1 SV=1	7.479	7	3	3	3	1	581	64.9	5.77	4.99	3
High	Q9DBR1	5'-3' exoribonuclease 2 OS=Mus musculus OX=10090 GN=Xrn2 PE=1 SV=1	7.466	3	3	3	3	1	951	108.6	7.59	2.46	3
High	O89090	Transcription factor Sp1 OS=Mus musculus OX=10090 GN=Sp1 PE=1 SV=2	7.372	6	3	3	3	1	784	80.7	7.34	4.42	3
High	P62858	40S ribosomal protein S28 OS=Mus musculus OX=10090 GN=Rps28 PE=1 SV=1	7.36	41	3	4	3	1	69	7.8	10.7	5.58	3
High	P62852	40S ribosomal protein S25 OS=Mus musculus OX=10090 GN=Rps25 PE=1 SV=1	7.339	17	3	8	3	1	125	13.7	10.11	14.52	3
High	O35295	Transcriptional activator protein Pur-beta OS=Mus musculus OX=10090 GN=Purb PE=1 SV=3	7.332	12	3	3	3	1	324	33.9	5.43	2.34	3
High	Q9D937	Uncharacterized protein C11orf98 homolog OS=Mus musculus OX=10090 PE=1 SV=1	7.251	27	4	4	4	1	123	14.1	11.47	7.27	4
High	G3X9Q6	La-related protein 4 OS=Mus musculus OX=10090 GN=Larp4 PE=1 SV=1	7.248	3	2	2	2	1	719	79.7	6.51	3.87	2
High	Q9CRB2	H/ACA ribonucleoprotein complex subunit 2 OS=Mus musculus OX=10090 GN=Nhp2 PE=1 SV=1	7.194	22	2	2	2	1	153	17.2	8.41	5	2
High	Q9CXW4	60S ribosomal protein L11 OS=Mus musculus OX=10090 GN=Rpl11 PE=1 SV=4	7.146	19	3	4	3	1	178	20.2	9.6	9.43	3
High	P55200	Histone-lysine N-methyltransferase 2A OS=Mus musculus OX=10090 GN=Kmt2a PE=1 SV=3	7.144	1	4	4	4	1	3966	429.4	9.16	3.72	4
High	Q9CX86	Heterogeneous nuclear ribonucleoprotein A0 OS=Mus musculus OX=10090 GN=Hnrnpa0 PE=1 SV=1	7.11	12	2	3	2	1	305	30.5	9.31	4.4	2
High	Q3TZP3	Uncharacterized protein OS=Mus musculus OX=10090 GN=Mta2 PE=2 SV=1	7.006	6	3	3	2	1	668	75	9.72	4.47	3
High	A0A1W2P768	Histone H3.2 OS=Mus musculus OX=10090 GN=H3c14 PE=1 SV=1	7.004	24	2	2	1	1	181	20.2	11.39	3.37	2
High	Q60749	KH domain-containing, RNA-binding, signal transduction-associated protein 1 OS=Mus musculus OX=10090 GN=Khdrbs1 PE=1 SV=2	6.972	3	2	3	2	1	443	48.3	8.72	8.13	2
High	P47915	60S ribosomal protein L29 OS=Mus musculus OX=10090 GN=Rpl29 PE=1 SV=2	6.933	14	2	6	2	1	160	17.6	11.84	17.36	2
High	G3UXA6	Polypyrimidine tract-binding protein 3 OS=Mus musculus OX=10090 GN=Ptbp3 PE=1 SV=1	6.902	5	3	3	1	1	554	59.7	8.94	1.64	3
High	Q9R0L6-2	Isoform 2 of Pericentriolar material 1 protein OS=Mus musculus OX=10090 GN=Pcm1	6.82	2	3	3	3	1	2064	232.7	4.97	2.1	3
High	Q9JJ80	Ribosome production factor 2 homolog OS=Mus musculus OX=10090 GN=Rpf2 PE=2 SV=2	6.795	18	4	4	4	1	306	35.3	10.04	4.09	4
High	Q8BLH7	HIRA-interacting protein 3 OS=Mus musculus OX=10090 GN=Hirip3 PE=1 SV=1	6.793	4	1	1	1	1	601	65.2	7.84	4.35	1
High	Q6ZQH0	MKIAA0187 protein (Fragment) OS=Mus musculus OX=10090 GN=Bms1 PE=2 SV=1	6.768	3	4	4	4	1	1287	145.6	6.27	2.25	4
High	Q02526	Zinc finger protein 41 OS=Mus musculus OX=10090 GN=Zfp41 PE=2 SV=2	6.732	18	3	3	3	1	198	22.7	9.8	4.83	3
High	P63154	Crooked neck-like protein 1 OS=Mus musculus OX=10090 GN=Crnkl1 PE=1 SV=1	6.586	4	3	3	3	1	690	83.4	6.93	4.22	3
High	Q80WC1-4	Isoform 4 of Ubinuclein-2 OS=Mus musculus OX=10090 GN=Ubn2	6.571	3	4	4	4	1	1316	141.8	9.17	2.27	4
High	Q7M754	Try10-like trypsinogen OS=Mus musculus OX=10090 GN=Gm5409 PE=2 SV=1	6.545	15	2	3	1	1	246	26.5	5.06	4.49	2
High	P0C0S6	Histone H2A.Z OS=Mus musculus OX=10090 GN=H2az1 PE=1 SV=2	6.504	26	3	5	2	1	128	13.5	10.58	9.33	3
High	Q80XH9	ELAV-like protein OS=Mus musculus OX=10090 GN=Elavl4 PE=2 SV=1	6.489	10	3	4	3	1	412	45.3	9.28	2.62	3
High	Q99JF8	PC4 and SFRS1-interacting protein OS=Mus musculus OX=10090 GN=Psip1 PE=1 SV=1	6.482	5	2	2	2	1	528	59.7	9.13	0	2
High	Q60520-1	Isoform 2 of Paired amphipathic helix protein Sin3a OS=Mus musculus OX=10090 GN=Sin3a	6.474	4	4	4	4	1	1277	145.4	7.25	1.76	4
High	Q9CY58	Plasminogen activator inhibitor 1 RNA-binding protein OS=Mus musculus OX=10090 GN=Serbp1 PE=1 SV=2	6.395	9	3	3	3	1	407	44.7	8.54	1.73	3
High	E9QAP7	TATA-box-binding protein-associated factor 4 OS=Mus musculus OX=10090 GN=Taf4 PE=1 SV=1	6.382	3	2	2	2	1	1042	105.2	9.86	5.44	2
High	G5E896	Enhancer of mRNA-decapping protein 4 OS=Mus musculus OX=10090 GN=Edc4 PE=1 SV=1	6.365	3	3	3	3	1	1406	152.4	5.82	4.42	3
High	Q921F4	Heterogeneous nuclear ribonucleoprotein L-like OS=Mus musculus OX=10090 GN=Hnrnpll PE=1 SV=3	6.339	8	3	3	3	1	591	64.1	5.85	2.03	3
High	Q9DCA5	Ribosome biogenesis protein BRX1 homolog OS=Mus musculus OX=10090 GN=Brix1 PE=1 SV=3	6.338	9	3	3	3	1	353	41.2	10.02	3.99	3
High	Q8C852	Uncharacterized protein OS=Mus musculus OX=10090 GN=Dcx PE=2 SV=1	6.329	9	3	3	3	1	379	42.5	9.72	5.98	3
High	A0A0R4J1I3	Menin OS=Mus musculus OX=10090 GN=Men1 PE=1 SV=1	6.326	6	3	3	3	1	617	68	6.39	6.93	3
High	Q14C24	U2 small nuclear ribonucleoprotein auxiliary factor (U2AF) 1 OS=Mus musculus OX=10090 GN=U2af1 PE=1 SV=1	6.287	11	2	3	2	1	239	27.8	8.81	6.69	2
High	Q3UL36	Arginine and glutamate-rich protein 1 OS=Mus musculus OX=10090 GN=Arglu1 PE=1 SV=2	6.266	11	4	5	4	1	271	32.9	10.36	3.75	4
High	P62309	Small nuclear ribonucleoprotein G OS=Mus musculus OX=10090 GN=Snrpg PE=1 SV=1	6.264	17	2	2	2	1	76	8.5	8.88	5.69	2
High	H7BX94	Lysine-rich nucleolar protein 1 OS=Mus musculus OX=10090 GN=Knop1 PE=1 SV=2	6.19	7	3	3	3	1	532	59.6	9.98	4.6	3
High	Q8R1F0	Leydig cell tumor 10 kDa protein homolog OS=Mus musculus OX=10090 GN=D8Ertd738e PE=3 SV=1	6.182	17	3	3	3	1	94	10.2	11.63	7.38	3
High	P59708	Splicing factor 3B subunit 6 OS=Mus musculus OX=10090 GN=Sf3b6 PE=1 SV=1	6.154	21	2	2	2	1	125	14.6	9.38	2.42	2
High	P08113	Endoplasmin OS=Mus musculus OX=10090 GN=Hsp90b1 PE=1 SV=2	6.127	3	2	2	1	1	802	92.4	4.82	4.61	2
High	Q8CEW9	Splicing factor 3B subunit 5 OS=Mus musculus OX=10090 GN=Sf3b5 PE=2 SV=1	6.125	28	2	2	2	1	86	10.2	6.67	2.09	2
High	Q8JZX4	Splicing factor 45 OS=Mus musculus OX=10090 GN=Rbm17 PE=1 SV=1	6.122	9	3	3	2	1	405	45.3	5.82	4.56	3
High	G4V4Z1	Capsid protein p30 OS=Mus musculus OX=10090 GN=gag-pro-pol PE=3 SV=1	6.037	2	2	3	2	1	1737	194.3	8.97	7.31	2
High	Q8C6B9	Active regulator of SIRT1 OS=Mus musculus OX=10090 GN=Rps19bp1 PE=1 SV=1	5.978	13	1	1	1	1	143	16	10.83	3.44	1
High	Q9DC48	Pre-mRNA-processing factor 17 OS=Mus musculus OX=10090 GN=Cdc40 PE=2 SV=1	5.925	6	3	3	3	1	579	65.4	7.06	2.9	3
High	Q3U8X1	Eukaryotic translation initiation factor 3 subunit F OS=Mus musculus OX=10090 GN=Eif3f PE=2 SV=1	5.858	10	3	3	3	1	361	38	5.58	3.81	3
High	F6YUI5	H/ACA ribonucleoprotein complex subunit DKC1 (Fragment) OS=Mus musculus OX=10090 GN=Dkc1 PE=1 SV=1	5.855	14	2	3	1	1	184	20.8	8.62	8.5	2
High	E9Q6E5	Serine and arginine-rich-splicing factor 11 OS=Mus musculus OX=10090 GN=Srsf11 PE=1 SV=1	5.84	4	1	1	1	1	511	56.7	10.7	3.76	1
High	F8VQC1	Signal recognition particle subunit SRP72 OS=Mus musculus OX=10090 GN=Srp72 PE=1 SV=1	5.765	5	3	3	3	1	671	74.6	9.23	0	3
High	Q3UIG0	Eukaryotic translation initiation factor 3 subunit E OS=Mus musculus OX=10090 GN=Eif3e PE=1 SV=1	5.69	7	3	3	3	1	445	52.2	6.04	3.51	3
High	A8DUK0	Beta-globin OS=Mus musculus OX=10090 GN=Hbbt1 PE=3 SV=1	5.663	24	3	4	3	1	147	15.8	7.65	8.12	3
High	A0A0R4J008	Histone deacetylase 2 OS=Mus musculus OX=10090 GN=Hdac2 PE=1 SV=1	5.628	9	4	4	1	1	488	55.3	5.91	6.65	4
High	Q62311	Transcription initiation factor TFIID subunit 6 OS=Mus musculus OX=10090 GN=Taf6 PE=1 SV=1	5.621	5	2	2	2	1	678	72.6	8.6	2.55	2
High	Q61033	Lamina-associated polypeptide 2, isoforms alpha/zeta OS=Mus musculus OX=10090 GN=Tmpo PE=1 SV=4	5.579	6	3	3	2	1	693	75.1	8.05	1.66	3
High	O35218	Cleavage and polyadenylation specificity factor subunit 2 OS=Mus musculus OX=10090 GN=Cpsf2 PE=1 SV=1	5.476	3	2	2	2	1	782	88.3	5.11	1.79	2
High	D3U0D6	Kidney highly expressed protein 1 OS=Mus musculus OX=10090 GN=Rrp7a PE=2 SV=1	5.456	15	3	3	3	1	280	32.4	9.54	2.64	3
High	Q8BP71	RNA binding protein fox-1 homolog 2 OS=Mus musculus OX=10090 GN=Rbfox2 PE=1 SV=2	5.439	4	2	2	2	1	449	47.3	6.55	4.94	2
High	Q9Z1X4-3	Isoform 3 of Interleukin enhancer-binding factor 3 OS=Mus musculus OX=10090 GN=Ilf3	5.434	4	3	4	3	1	911	97.7	8.95	0	3
High	Q9QYB2	Dachshund homolog 1 OS=Mus musculus OX=10090 GN=Dach1 PE=1 SV=1	5.376	4	3	3	3	1	751	77.9	8.53	5.8	3
High	Q6ZWV7	60S ribosomal protein L35 OS=Mus musculus OX=10090 GN=Rpl35 PE=1 SV=1	5.345	20	3	3	3	1	123	14.5	11.05	2.41	3
High	P97350	Plakophilin-1 OS=Mus musculus OX=10090 GN=Pkp1 PE=1 SV=1	5.29	3	2	2	2	1	728	80.8	8.91	2.18	2
High	Q71LX8	Heat shock protein 84b OS=Mus musculus OX=10090 GN=Hsp90ab1 PE=1 SV=1	5.283	5	3	3	2	1	724	83.2	5.03	3.98	3
High	Q8K015	Centromere protein O OS=Mus musculus OX=10090 GN=Cenpo PE=2 SV=1	5.253	7	2	2	2	1	298	34.1	8.79	4.32	2
High	O54962	Barrier-to-autointegration factor OS=Mus musculus OX=10090 GN=Banf1 PE=1 SV=1	5.249	40	2	3	2	1	89	10.1	6.09	7.69	2
High	Q8CGF7	Transcription elongation regulator 1 OS=Mus musculus OX=10090 GN=Tcerg1 PE=1 SV=2	5.239	3	3	3	3	1	1100	123.7	8.65	2.23	3
High	I3PQW3	La ribonucleoprotein domain family member 7 OS=Mus musculus OX=10090 GN=Larp7 PE=3 SV=1	5.226	4	2	2	2	1	570	64.8	9.47	4.64	2
High	Q3TL58	S-phase kinase-associated protein 1 OS=Mus musculus OX=10090 GN=Skp1 PE=2 SV=1	5.185	12	2	2	2	1	163	18.7	4.58	2.17	2
High	Q6NZQ3	Sm protein F (Fragment) OS=Mus musculus OX=10090 GN=Snrpf PE=2 SV=1	5.175	12	2	2	2	1	112	12.2	5.03	5.33	2
High	O70194	Eukaryotic translation initiation factor 3 subunit D OS=Mus musculus OX=10090 GN=Eif3d PE=1 SV=2	5.171	5	2	2	2	1	548	63.9	6.05	2.4	2
High	Q80Y19	Rho GTPase-activating protein 11A OS=Mus musculus OX=10090 GN=Arhgap11a PE=1 SV=2	5.095	4	3	3	3	1	987	108.4	8.81	3.84	3
High	Q8C2T9	Uncharacterized protein OS=Mus musculus OX=10090 GN=Ik PE=2 SV=1	5.025	4	3	3	3	1	557	65.5	6.64	5.58	3
High	A0A2I3BPG9	Ribosomal protein L36A, pseudogene 1 OS=Mus musculus OX=10090 GN=Rpl36a-ps1 PE=3 SV=1	4.92	16	2	3	2	1	106	12.4	10.51	7.72	2
High	P08551	Neurofilament light polypeptide OS=Mus musculus OX=10090 GN=Nefl PE=1 SV=5	4.74	3	2	2	2	1	543	61.5	4.64	1.87	2
High	Q3UCF2	Uncharacterized protein OS=Mus musculus OX=10090 GN=Cdc5l PE=1 SV=1	4.648	4	3	3	3	1	802	92.1	8.02	3.71	3
High	Q6A0A9	Constitutive coactivator of PPAR-gamma-like protein 1 OS=Mus musculus OX=10090 GN=FAM120A PE=1 SV=2	4.635	3	3	3	3	1	1112	121.6	8.92	1.95	3
High	Q9CQS2	H/ACA ribonucleoprotein complex subunit 3 OS=Mus musculus OX=10090 GN=Nop10 PE=3 SV=1	4.608	23	1	1	1	1	64	7.7	9.99	3.46	1
High	Q80Y82	Protein kinase C binding protein 1 OS=Mus musculus OX=10090 GN=Zmynd8 PE=2 SV=3	4.58	2	2	2	2	1	1255	139.1	7.12	1.97	2
High	Q3TXW9	HDAC_interact domain-containing protein OS=Mus musculus OX=10090 GN=Sin3b PE=2 SV=1	4.542	2	1	1	1	1	1098	126.3	7.14	0	1
High	Q3TKG5	H/ACA ribonucleoprotein complex subunit OS=Mus musculus OX=10090 GN=Gar1 PE=2 SV=1	4.526	12	2	2	2	1	231	23.5	11.02	4.56	2
High	Q9WU62	Inner centromere protein OS=Mus musculus OX=10090 GN=Incenp PE=1 SV=2	4.523	1	1	1	1	1	880	101.1	9.55	0	1
High	Q3U6Q1	Uncharacterized protein OS=Mus musculus OX=10090 GN=Wbp11 PE=2 SV=1	4.502	3	2	2	2	1	641	69.8	8.62	2.27	2
High	Q9Z2X1	Heterogeneous nuclear ribonucleoprotein F OS=Mus musculus OX=10090 GN=Hnrnpf PE=1 SV=3	4.491	8	3	3	2	1	415	45.7	5.49	3.73	3
High	Q149H7	Centromere protein U OS=Mus musculus OX=10090 GN=Cenpu PE=2 SV=1	4.437	7	2	2	2	1	410	46.3	9.69	2.46	2
High	Q60668	Heterogeneous nuclear ribonucleoprotein D0 OS=Mus musculus OX=10090 GN=Hnrnpd PE=1 SV=2	4.425	5	2	3	2	1	355	38.3	7.81	4.41	2
High	Q3THA0	Eukaryotic translation initiation factor 3 subunit G OS=Mus musculus OX=10090 GN=Eif3g PE=2 SV=1	4.386	8	2	2	2	1	320	35.6	5.9	2.17	2
High	Q8CIJ3	Eukaryotic translation initiation factor 3 subunit B OS=Mus musculus OX=10090 GN=Eif3b PE=2 SV=1	4.37	4	3	4	3	1	970	108.9	5.54	2.19	3
High	Q61990	Poly(rC)-binding protein 2 OS=Mus musculus OX=10090 GN=Pcbp2 PE=1 SV=1	4.361	8	2	2	2	1	362	38.2	6.79	4.31	2
High	P60335	Poly(rC)-binding protein 1 OS=Mus musculus OX=10090 GN=Pcbp1 PE=1 SV=1	4.281	8	2	2	2	1	356	37.5	7.09	2.36	2
High	Q8CIB9	N-acetyltransferase ESCO2 OS=Mus musculus OX=10090 GN=Esco2 PE=1 SV=3	4.242	3	2	2	2	1	592	67.2	9.48	0	2
High	P30681	High mobility group protein B2 OS=Mus musculus OX=10090 GN=Hmgb2 PE=1 SV=3	4.234	6	1	1	1	1	210	24.1	7.31	2	1
High	Q3UBK2	High mobility group protein 1 OS=Mus musculus OX=10090 GN=Hmgb1 PE=2 SV=1	4.19	7	2	3	2	1	215	24.9	5.74	1.82	2
High	E9PXC0	Signal recognition particle 54 kDa protein OS=Mus musculus OX=10090 GN=Srp54c PE=1 SV=1	4.126	3	1	1	1	1	504	55.8	8.92	2.92	1
High	Q8C5N3	Pre-mRNA-splicing factor CWC22 homolog OS=Mus musculus OX=10090 GN=Cwc22 PE=1 SV=1	3.944	3	3	3	3	1	908	104.7	8.09	1.62	3
High	A2AMU9	Ribosome assembly factor mrt4 OS=Mus musculus OX=10090 GN=Mrto4 PE=1 SV=1	3.915	12	3	3	3	1	239	27.5	8.54	1.94	3
High	Q9CZ92	Centromere protein P OS=Mus musculus OX=10090 GN=Cenpp PE=2 SV=1	3.819	7	2	2	2	1	286	33.3	5.25	2.73	2
High	P60060	Protein transport protein Sec61 subunit gamma OS=Mus musculus OX=10090 GN=Sec61g PE=3 SV=1	3.817	18	1	1	1	1	68	7.7	9.99	2.14	1
High	E9QAG4	RIKEN cDNA 4930522L14 gene OS=Mus musculus OX=10090 GN=4930522L14Rik PE=1 SV=1	3.771	2	2	2	2	1	666	78.4	9.1	2.33	2
High	Q3TLH4	Protein PRRC2C OS=Mus musculus OX=10090 GN=Prrc2c PE=1 SV=3	3.755	0	1	1	1	1	2846	310.7	9.1	1.67	1
High	Q91WN1	DnaJ homolog subfamily C member 9 OS=Mus musculus OX=10090 GN=Dnajc9 PE=1 SV=2	3.72	4	1	1	1	1	259	30	5.94	2.03	1
High	Q8K4P0	pre-mRNA 3' end processing protein WDR33 OS=Mus musculus OX=10090 GN=Wdr33 PE=1 SV=1	3.693	2	2	2	2	1	1330	145.2	9.13	0	2
High	D3Z7M5	Nucleolar protein 16 OS=Mus musculus OX=10090 GN=Nop16 PE=1 SV=1	3.682	14	3	3	3	1	181	21.5	10.02	1.78	3
High	B1AUX2	Host cell factor 1 OS=Mus musculus OX=10090 GN=Hcfc1 PE=1 SV=1	3.664	1	2	2	2	1	2090	214.9	6.89	2.15	2
High	Q3TAB2	Uncharacterized protein (Fragment) OS=Mus musculus OX=10090 GN=Tcof1 PE=2 SV=1	3.631	3	2	2	1	1	696	72.1	9.14	2.14	2
High	Q5U4C3	Splicing factor, arginine/serine-rich 19 OS=Mus musculus OX=10090 GN=Scaf1 PE=1 SV=1	3.622	2	2	2	2	1	1256	133.8	9.45	2.32	2
High	Q9DB96	Neuroguidin OS=Mus musculus OX=10090 GN=Ngdn PE=1 SV=1	3.613	4	1	1	1	1	315	35.6	9.58	2.44	1
High	Q3U955	Uncharacterized protein OS=Mus musculus OX=10090 GN=Tmpo PE=2 SV=1	3.541	8	2	2	1	1	452	50.4	9.54	4.45	2
High	Q505A8	Ribosomal protein L39 OS=Mus musculus OX=10090 GN=Rpl39 PE=1 SV=1	3.518	20	1	1	1	1	51	6.4	12.56	3.46	1
High	Q9ERR1	Nuclear distribution protein nudE-like 1 OS=Mus musculus OX=10090 GN=Ndel1 PE=1 SV=2	3.507	5	2	2	2	1	345	38.3	5.24	3.88	2
High	Q69ZP6	MKIAA1178 protein (Fragment) OS=Mus musculus OX=10090 GN=Cd2bp2 PE=2 SV=1	3.506	7	2	2	2	1	346	38.1	4.6	2.11	2
High	Q9CYI4	Putative RNA-binding protein Luc7-like 1 OS=Mus musculus OX=10090 GN=Luc7l PE=1 SV=2	3.489	6	2	3	1	1	371	43.9	9.88	1.88	2
High	Q8BMB0	BRCA2-interacting transcriptional repressor EMSY OS=Mus musculus OX=10090 GN=Emsy PE=1 SV=2	3.469	2	2	2	2	1	1264	135.2	9.38	3.99	2
High	A0A1I7Q4A6	Centromere protein Q OS=Mus musculus OX=10090 GN=Cenpq PE=1 SV=1	3.465	8	2	2	2	1	269	30.7	9.36	2.01	2
High	Q91V99	40S ribosomal protein S30 (Fragment) OS=Mus musculus OX=10090 GN=fau PE=3 SV=1	3.394	7	1	4	1	1	137	14.8	10.05	11.27	1
High	Q80UW8	DNA-directed RNA polymerases I, II, and III subunit RPABC1 OS=Mus musculus OX=10090 GN=Polr2e PE=1 SV=1	3.386	10	2	2	2	1	210	24.6	5.95	0	2
High	O70126	Aurora kinase B OS=Mus musculus OX=10090 GN=Aurkb PE=1 SV=2	3.277	7	2	2	2	1	345	39.4	9.44	0	2
High	Q3TIX9	U4/U6.U5 tri-snRNP-associated protein 2 OS=Mus musculus OX=10090 GN=Usp39 PE=1 SV=2	3.271	6	3	3	3	1	564	65.1	8.9	2.09	3
High	Q3T9Y8	Eukaryotic translation initiation factor 3 subunit I OS=Mus musculus OX=10090 GN=Eif3i PE=2 SV=1	3.261	7	2	2	2	1	325	36.4	5.77	2.11	2
High	Q497V5	S1 RNA-binding domain-containing protein 1 OS=Mus musculus OX=10090 GN=Srbd1 PE=2 SV=3	3.255	1	1	1	1	1	982	110.2	8.78	1.73	1
High	Q8CC96	Protein BNIP5 OS=Mus musculus OX=10090 GN=Bnip5 PE=2 SV=1	3.255	2	1	2	1	1	669	72.9	9.01	0	1
High	A0A0R4J170	Transcription activator BRG1 OS=Mus musculus OX=10090 GN=Smarca4 PE=1 SV=1	3.217	1	2	2	2	1	1617	181.7	8.07	1.77	2
High	A0A0A0MQF6	Glyceraldehyde-3-phosphate dehydrogenase OS=Mus musculus OX=10090 GN=Gapdh PE=1 SV=1	3.217	6	2	2	2	1	359	38.6	8.97	0	2
High	B9EJX8	Peptidyl-prolyl cis-trans isomerase OS=Mus musculus OX=10090 GN=Ppil1 PE=1 SV=1	3.207	10	1	1	1	1	166	18.2	7.99	0	1
High	Q7TNC4	Putative RNA-binding protein Luc7-like 2 OS=Mus musculus OX=10090 GN=Luc7l2 PE=1 SV=1	3.197	5	2	2	1	1	392	46.6	10.1	2.54	2
High	Q61686	Chromobox protein homolog 5 OS=Mus musculus OX=10090 GN=Cbx5 PE=1 SV=1	3.162	11	2	2	2	1	191	22.2	5.86	1.9	2
High	P02301	Histone H3.3C OS=Mus musculus OX=10090 GN=H3-5 PE=3 SV=3	3.16	32	2	2	1	1	136	15.3	11.14	2.12	2
High	Q5DU09	Zinc finger protein 652 OS=Mus musculus OX=10090 GN=Znf652 PE=1 SV=2	3.146	2	1	1	1	1	608	69.4	8.75	3.06	1
High	Q99J95	Cyclin-dependent kinase 9 OS=Mus musculus OX=10090 GN=Cdk9 PE=1 SV=1	3.104	6	2	2	1	1	372	42.7	8.79	1.68	2
High	B9EKU4	URB2 ribosome biogenesis 2 homolog (S. cerevisiae) OS=Mus musculus OX=10090 GN=Urb2 PE=2 SV=1	3.055	1	1	1	1	1	1524	171.6	7.34	2.14	1
High	P48678	Prelamin-A/C OS=Mus musculus OX=10090 GN=Lmna PE=1 SV=2	2.993	2	2	2	1	1	665	74.2	6.98	1.79	2
High	O54941	SWI/SNF-related matrix-associated actin-dependent regulator of chromatin subfamily E member 1 OS=Mus musculus OX=10090 GN=Smarce1 PE=1 SV=1	2.988	3	1	1	1	1	411	46.6	4.88	1.82	1
High	Q9CY46	U6 snRNA-associated Sm-like protein LSm4 OS=Mus musculus OX=10090 GN=Lsm4 PE=1 SV=1	2.968	7	1	1	1	1	138	15.2	10.05	1.94	1
High	A0A087WNT1	Elongin-C OS=Mus musculus OX=10090 GN=Eloc PE=1 SV=1	2.93	9	1	1	1	1	134	14.9	4.73	0	1
High	Q3TK27	Guanine nucleotide-binding protein-like 3 OS=Mus musculus OX=10090 GN=Gnl3 PE=2 SV=1	2.916	4	2	2	2	1	538	60.7	9.14	1.95	2
High	Q8R0F5	RNA-binding motif protein, X-linked 2 OS=Mus musculus OX=10090 GN=Rbmx2 PE=1 SV=1	2.894	4	1	1	1	1	326	37.5	9.72	1.98	1
High	Q3UFZ4	Nucleolar protein 10 OS=Mus musculus OX=10090 GN=Nol10 PE=2 SV=1	2.88	2	2	2	2	1	687	80	8.29	1.88	2
High	Q921N6	Probable ATP-dependent RNA helicase DDX27 OS=Mus musculus OX=10090 GN=Ddx27 PE=1 SV=3	2.856	3	2	2	2	1	760	85.9	9.25	3.91	2
High	Q4G0F8-3	Isoform 3 of Ubinuclein-1 OS=Mus musculus OX=10090 GN=Ubn1	2.816	2	2	2	2	1	1142	123.3	9.19	1.69	2
High	O08789	Max-binding protein MNT OS=Mus musculus OX=10090 GN=Mnt PE=2 SV=2	2.802	2	1	1	1	1	591	63.2	9.13	0	1
High	O35901	G7b alternative form OS=Mus musculus OX=10090 GN=Lsm2 PE=1 SV=1	2.799	15	1	1	1	1	131	14.8	7.34	1.63	1
High	A0A4E9FT70	IgG3 (Fragment) OS=Mus musculus OX=10090 GN=IGHG3 PE=4 SV=1	2.798	5	2	4	2	1	376	41.2	7.9	1.64	2
High	A9JTY7	Small proline-rich protein 2B OS=Mus musculus OX=10090 GN=Sprr2b PE=2 SV=1	2.765	9	1	1	1	1	98	10.7	7.49	2.15	1
High	Q8C5L7	RNA-binding protein 34 OS=Mus musculus OX=10090 GN=Rbm34 PE=1 SV=2	2.764	3	1	1	1	1	442	49.1	10.01	2.27	1
High	Q9D0R8	Protein LSM12 homolog OS=Mus musculus OX=10090 GN=Lsm12 PE=1 SV=1	2.763	5	1	1	1	1	195	21.7	7.74	2.02	1
High	E9QKD1	Nucleolar protein 8 OS=Mus musculus OX=10090 GN=Nol8 PE=1 SV=1	2.755	1	1	1	1	1	1165	130.6	6.51	0	1
High	Q3UK38	rRNA adenine N(6)-methyltransferase OS=Mus musculus OX=10090 GN=Dimt1 PE=2 SV=1	2.753	6	2	2	2	1	313	35.2	10.05	1.67	2
High	P28481	Collagen alpha-1(II) chain OS=Mus musculus OX=10090 GN=Col2a1 PE=1 SV=2	2.727	2	2	3	1	1	1487	141.9	6.92	6.37	2
High	A2ASY1	TAF3 RNA polymerase II, TATA box binding protein (TBP)-associated factor OS=Mus musculus OX=10090 GN=Taf3 PE=2 SV=1	2.724	1	1	1	1	1	932	105	9.19	2.1	1
High	Q3V455	Nicotinamide-nucleotide adenylyltransferase OS=Mus musculus OX=10090 PE=2 SV=1	2.669	3	1	1	1	1	285	32.3	9	1.91	1
High	A0A1D5RML8	DNA-directed RNA polymerase II subunit RPB3 OS=Mus musculus OX=10090 GN=Polr2c PE=1 SV=1	2.668	4	1	1	1	1	439	48.3	6.05	0	1
High	P97329	Kinesin-like protein KIF20A OS=Mus musculus OX=10090 GN=Kif20a PE=1 SV=1	2.656	1	1	1	1	1	887	99.8	6.99	2	1
High	Q8CJF7	Protein ELYS OS=Mus musculus OX=10090 GN=Ahctf1 PE=1 SV=1	2.653	1	1	1	1	1	2243	247.5	6.55	2.68	1
High	P63239	Neuroendocrine convertase 1 OS=Mus musculus OX=10090 GN=Pcsk1 PE=1 SV=1	2.634	1	1	1	1	1	753	84.1	6.43	0	1
High	Q9CZU3	Exosome RNA helicase MTR4 OS=Mus musculus OX=10090 GN=Mtrex PE=1 SV=1	2.624	3	1	1	1	1	1040	117.6	6.4	0	1
High	Q78P92	FSHD Region Gene 1 protein OS=Mus musculus OX=10090 GN=Frg1 PE=1 SV=1	2.604	5	1	1	1	1	258	29.1	8.92	2.45	1
High	Q3V1X4	Uncharacterized protein OS=Mus musculus OX=10090 GN=Surf6 PE=2 SV=1	2.575	6	2	2	2	1	355	41.2	10.52	3.43	2
High	Q91YN9	BAG family molecular chaperone regulator 2 OS=Mus musculus OX=10090 GN=Bag2 PE=1 SV=1	2.574	5	1	1	1	1	210	23.5	6.42	2.11	1
High	A0A0A6YVV8	Muscleblind-like protein 1 OS=Mus musculus OX=10090 GN=Mbnl1 PE=1 SV=1	2.564	5	2	2	2	1	387	41.7	8.9	1.81	2
High	Q9CQJ4	E3 ubiquitin-protein ligase RING2 OS=Mus musculus OX=10090 GN=Rnf2 PE=1 SV=1	2.496	8	2	2	2	1	336	37.6	6.84	0	2
High	Q9D0P7	Proline/serine-rich coiled-coil protein 1 OS=Mus musculus OX=10090 GN=Psrc1 PE=1 SV=2	2.471	3	1	1	1	1	329	34.7	10.7	2.38	1
High	Q01149	Collagen alpha-2(I) chain OS=Mus musculus OX=10090 GN=Col1a2 PE=1 SV=2	2.45	1	2	3	2	1	1372	129.5	9.19	6.51	2
High	Q810V0	U3 small nucleolar ribonucleoprotein protein MPP10 OS=Mus musculus OX=10090 GN=Mphosph10 PE=1 SV=2	2.445	2	1	1	1	1	681	78.7	4.87	1.73	1
High	Q8BH44	Coronin-2B OS=Mus musculus OX=10090 GN=Coro2b PE=1 SV=2	2.441	3	1	1	1	1	480	54.9	8.27	0	1
High	A0A1L1SV25	Alpha-actinin-4 OS=Mus musculus OX=10090 GN=Actn4 PE=1 SV=1	2.438	1	1	1	1	1	932	107	5.36	0	1
High	Q8BZR9	Nuclear cap-binding protein subunit 3 OS=Mus musculus OX=10090 GN=Ncbp3 PE=1 SV=1	2.395	1	1	1	1	1	615	70	5.8	0	1
High	Q3TE95	Uncharacterized protein OS=Mus musculus OX=10090 GN=Rcn2 PE=2 SV=1	2.388	4	1	1	1	1	355	41	4.59	1.9	1
High	P61965	WD repeat-containing protein 5 OS=Mus musculus OX=10090 GN=Wdr5 PE=1 SV=1	2.372	5	1	1	1	1	334	36.6	8.27	0	1
High	Q5SUS9	RNA-binding protein EWS OS=Mus musculus OX=10090 GN=Ewsr1 PE=1 SV=1	2.346	1	1	1	1	1	661	69	9.29	1.73	1
High	Q8JZU2	Tricarboxylate transport protein, mitochondrial OS=Mus musculus OX=10090 GN=Slc25a1 PE=1 SV=1	2.327	6	2	2	2	1	311	33.9	9.89	0	2
High	Q6PAQ4	RNA exonuclease 4 OS=Mus musculus OX=10090 GN=Rexo4 PE=2 SV=2	2.325	2	1	1	1	1	432	47.6	9.91	0	1
High	Q80WV7	Serine/arginine repetitive matrix protein 3 OS=Mus musculus OX=10090 GN=Srrm3 PE=2 SV=1	2.319	2	1	1	1	1	648	71.1	11.55	0	1
High	Q99LB0	Deoxynucleotidyltransferase terminal-interacting protein 1 OS=Mus musculus OX=10090 GN=Dnttip1 PE=1 SV=1	2.306	4	1	1	1	1	328	36.8	9.07	2.13	1
High	P56183	Ribosomal RNA processing protein 1 homolog A OS=Mus musculus OX=10090 GN=Rrp1 PE=1 SV=2	2.303	2	1	1	1	1	494	54.7	5.17	2.31	1
High	E9PVA2	Ribosomal RNA-processing protein 8 OS=Mus musculus OX=10090 GN=Rrp8 PE=1 SV=1	2.299	3	1	1	1	1	503	56.5	9.95	0	1
High	A2A6A1	G patch domain-containing protein 8 OS=Mus musculus OX=10090 GN=Gpatch8 PE=1 SV=1	2.236	1	1	1	1	1	1505	164.9	7.64	1.83	1
High	Q8C854	Myelin expression factor 2 OS=Mus musculus OX=10090 GN=Myef2 PE=1 SV=1	2.23	3	1	1	1	1	591	63.3	8.87	1.86	1
High	Q9WV85	Nucleoside diphosphate kinase 3 OS=Mus musculus OX=10090 GN=Nme3 PE=1 SV=3	2.226	7	1	1	1	1	169	19.1	6.68	0	1
High	A0A0B4J1K5	Immunoglobulin lambda variable 3 (Fragment) OS=Mus musculus OX=10090 GN=Iglv3 PE=4 SV=1	2.184	8	1	1	1	1	122	13.4	5.76	2.81	1
High	E9PZJ8	Activating signal cointegrator 1 complex subunit 3 OS=Mus musculus OX=10090 GN=Ascc3 PE=1 SV=1	2.176	1	2	2	2	1	2198	250.4	7.02	0	2
High	A0A668KL68	NF-kappa-B-repressing factor OS=Mus musculus OX=10090 GN=Nkrf PE=1 SV=1	2.175	1	1	1	1	1	784	88.2	8.9	0	1
High	Q6R891	Neurabin-2 OS=Mus musculus OX=10090 GN=Ppp1r9b PE=1 SV=1	2.175	4	2	2	2	1	817	89.5	4.92	2.14	2
High	D3YWN7	Ensconsin OS=Mus musculus OX=10090 GN=Map7 PE=1 SV=2	2.16	1	1	1	1	1	738	82.8	9.38	0	1
High	Q5SX53	Uncharacterized protein OS=Mus musculus OX=10090 GN=Slc25a11 PE=1 SV=1	2.15	3	1	1	1	1	314	34.1	9.94	1.73	1
High	Q6ZPH4	MKIAA1835 protein (Fragment) OS=Mus musculus OX=10090 GN=Rangap1 PE=2 SV=1	2.132	2	1	1	1	1	646	69.4	4.72	1.68	1
High	Q3TCX3	KH homology domain-containing protein 4 OS=Mus musculus OX=10090 GN=Khdc4 PE=1 SV=1	2.126	2	1	1	1	1	612	64.5	8.73	0	1
High	Q6ZPE9	MKIAA3013 protein (Fragment) OS=Mus musculus OX=10090 GN=Scaf11 PE=2 SV=1	2.119	1	1	1	1	1	1461	162.4	6.62	2.11	1
High	Q80T41	Gamma-aminobutyric acid type B receptor subunit 2 OS=Mus musculus OX=10090 GN=Gabbr2 PE=1 SV=2	2.103	2	1	1	1	1	940	105.6	8.72	2.71	1
High	P11440	Cyclin-dependent kinase 1 OS=Mus musculus OX=10090 GN=Cdk1 PE=1 SV=3	2.099	6	2	2	1	1	297	34.1	8.43	3.74	2
High	Q8BI72	CDKN2A-interacting protein OS=Mus musculus OX=10090 GN=Cdkn2aip PE=1 SV=1	2.083	2	1	1	1	1	563	59.7	9.16	1.69	1
High	Q8CFQ3	RNA helicase aquarius OS=Mus musculus OX=10090 GN=Aqr PE=1 SV=2	2.081	1	1	1	1	1	1481	170.2	6.27	0	1
High	O08579	Emerin OS=Mus musculus OX=10090 GN=Emd PE=1 SV=1	2.074	5	1	1	1	1	259	29.4	5.01	0	1
High	P70168	Importin subunit beta-1 OS=Mus musculus OX=10090 GN=Kpnb1 PE=1 SV=2	2.065	2	1	1	1	1	876	97.1	4.78	0	1
High	Q9ESC8	AF4/FMR2 family member 4 OS=Mus musculus OX=10090 GN=Aff4 PE=1 SV=1	2.059	1	1	1	1	1	1160	126.6	9.36	1.61	1
High	Q6PDG5	SWI/SNF complex subunit SMARCC2 OS=Mus musculus OX=10090 GN=Smarcc2 PE=1 SV=2	2.059	1	1	1	1	1	1213	132.5	5.59	1.68	1
High	E9PW43	Predicted pseudogene 10320 OS=Mus musculus OX=10090 GN=Gm10320 PE=3 SV=1	2.027	9	1	1	1	1	113	11.8	11.58	1.66	1
High	Q9JHS9	Spliceosome-associated protein CWC15 homolog OS=Mus musculus OX=10090 GN=Cwc15 PE=1 SV=1	2.013	5	1	1	1	1	229	26.6	5.71	2.42	1
High	P54823	Probable ATP-dependent RNA helicase DDX6 OS=Mus musculus OX=10090 GN=Ddx6 PE=1 SV=1	2.001	3	1	1	1	1	483	54.2	8.66	0	1
High	Q8BTU1	Cilia- and flagella-associated protein 20 OS=Mus musculus OX=10090 GN=Cfap20 PE=1 SV=1	1.967	6	1	1	1	1	193	22.7	9.76	1.82	1
High	Q8R3C6	Probable RNA-binding protein 19 OS=Mus musculus OX=10090 GN=Rbm19 PE=1 SV=1	1.935	1	1	1	1	1	952	106	6.57	0	1
High	A2AG58	BCLAF1 and THRAP3 family member 3 OS=Mus musculus OX=10090 GN=Bclaf3 PE=1 SV=1	1.914	1	1	1	1	1	752	90.1	9.58	0	1
High	E0CXT7	Cleavage and polyadenylation specificity factor subunit 4 OS=Mus musculus OX=10090 GN=Cpsf4 PE=1 SV=1	1.907	4	1	1	1	1	269	30.2	8.31	1.97	1
High	Q02614	SAP30-binding protein OS=Mus musculus OX=10090 GN=Sap30bp PE=1 SV=2	1.898	4	1	1	1	1	308	33.8	4.87	2.08	1
High	Q3TN42	U3 small nucleolar RNA-associated protein 15 homolog OS=Mus musculus OX=10090 GN=Utp15 PE=2 SV=1	1.894	3	1	1	1	1	528	59.4	8.81	0	1
High	Q5EEX1	Insulin OS=Mus musculus OX=10090 GN=Ins2 PE=1 SV=1	1.891	17	1	1	1	1	110	12.4	5.33	2.79	1
High	Q0VBL3	RNA-binding protein 15 OS=Mus musculus OX=10090 GN=Rbm15 PE=1 SV=1	1.883	1	1	1	1	1	962	105.7	10.08	0	1
High	Q6ZQ58	La-related protein 1 OS=Mus musculus OX=10090 GN=Larp1 PE=1 SV=3	1.871	1	1	1	1	1	1072	121.1	8.79	0	1
High	Q9D7S7	60S ribosomal protein L22-like 1 OS=Mus musculus OX=10090 GN=Rpl22l1 PE=1 SV=1	1.861	10	1	1	1	1	122	14.5	9.45	2.08	1
High	P60898	DNA-directed RNA polymerase II subunit RPB9 OS=Mus musculus OX=10090 GN=Polr2i PE=1 SV=1	1.855	18	1	1	1	1	125	14.5	5.14	0	1
High	Q99LT0	Protein dpy-30 homolog OS=Mus musculus OX=10090 GN=Dpy30 PE=1 SV=1	1.854	9	1	1	1	1	99	11.2	4.88	2.01	1
High	Q8K205	Processing of 1, ribonuclease P/MRP family, (S. cerevisiae) OS=Mus musculus OX=10090 GN=Pop1 PE=1 SV=1	1.853	1	1	1	1	1	1045	117.3	9.11	2.01	1
High	D3Z5F7	Predicted gene 20521 OS=Mus musculus OX=10090 GN=Gm20521 PE=3 SV=1	1.843	3	1	1	1	1	333	37.2	8.4	2.73	1
High	Q80XU3	Nuclear ubiquitous casein and cyclin-dependent kinase substrate 1 OS=Mus musculus OX=10090 GN=Nucks1 PE=1 SV=1	1.829	4	1	2	1	1	234	26.3	5.14	4.42	1
High	Q9D0F4	NF-kappa-B-activating protein OS=Mus musculus OX=10090 GN=Nkap PE=2 SV=1	1.799	4	1	1	1	1	415	47.2	10.13	0	1
High	Q8R2U0	Nucleoporin SEH1 OS=Mus musculus OX=10090 GN=Seh1l PE=2 SV=1	1.789	4	1	1	1	1	360	39.7	8.05	0	1
High	Q91VX2	Ubiquitin-associated protein 2 OS=Mus musculus OX=10090 GN=Ubap2 PE=1 SV=1	1.722	1	1	1	1	1	1132	117.9	7.72	2.05	1
High	Q8BHS3	Pre-mRNA-splicing factor RBM22 OS=Mus musculus OX=10090 GN=Rbm22 PE=1 SV=1	1.692	3	1	1	1	1	420	46.9	8.54	0	1
High	Q3UJX2	DUF1716 domain-containing protein OS=Mus musculus OX=10090 GN=Ctnnbl1 PE=2 SV=1	1.679	1	1	1	1	1	563	65	5.05	0	1
High	Q91WD7	Kinesin-like protein KIF18A OS=Mus musculus OX=10090 GN=Kif18a PE=2 SV=1	1.666	2	1	1	1	1	886	100.9	9.04	1.67	1
High	Q6P9R1	ATP-dependent RNA helicase DDX51 OS=Mus musculus OX=10090 GN=Ddx51 PE=1 SV=1	1.662	2	1	1	1	1	639	70.3	9.47	0	1
High	Q8BP60	Uncharacterized protein OS=Mus musculus OX=10090 GN=Nxf1 PE=2 SV=1	1.656	2	1	1	1	1	618	70.3	8.72	0	1
High	Q8C4J7	Transducin beta-like protein 3 OS=Mus musculus OX=10090 GN=Tbl3 PE=2 SV=1	1.65	2	1	1	1	1	801	88.2	6.81	0	1
High	Q5EBP9	Tripartite motif-containing 28 OS=Mus musculus OX=10090 GN=Trim28 PE=2 SV=1	1.632	1	1	1	1	1	834	88.8	5.77	1.81	1
High	Q925S1	MRP5 (Fragment) OS=Mus musculus OX=10090 GN=Ighv9-4 PE=2 SV=1	1.609	4	1	2	1	1	218	23	8.78	1.8	1
High	E9PZM4	Chromodomain-helicase-DNA-binding protein 2 OS=Mus musculus OX=10090 GN=Chd2 PE=1 SV=1	1.591	0	1	1	1	1	1827	210.7	8.06	0	1
High	Q3TAH3	Nucleoplasmin domain-containing protein OS=Mus musculus OX=10090 GN=Npm3 PE=2 SV=1	1.581	5	1	1	1	1	175	19	4.82	0	1
High	Q9ESU1	SWI/SNF-related matrix-associated actin-dependent regulator of chromatin subfamily B member 1 OS=Mus musculus OX=10090 GN=Smarcb1 PE=2 SV=1	1.561	2	1	1	1	1	385	44.1	6.23	0	1
High	Q8BGS0	Protein MAK16 homolog OS=Mus musculus OX=10090 GN=Mak16 PE=1 SV=1	1.539	6	1	1	1	1	296	35.2	5.31	0	1
High	Q8VC16	Leucine-rich repeat-containing protein 14 OS=Mus musculus OX=10090 GN=Lrrc14 PE=1 SV=1	1.528	1	1	1	1	1	493	54.9	6.67	1.77	1
High	A0A0R4IZZ6	Formin-binding protein 4 OS=Mus musculus OX=10090 GN=Fnbp4 PE=1 SV=1	1.527	1	1	1	1	1	1077	116.2	4.83	1.82	1
Medium	O35417	Proenkephalin-B OS=Mus musculus OX=10090 GN=Pdyn PE=2 SV=1	1.475	3	1	1	1	1	248	28	6.06	1.61	1
Medium	A0A0R4J073	BRCA1-A complex subunit RAP80 OS=Mus musculus OX=10090 GN=Uimc1 PE=1 SV=1	1.437	2	1	1	1	1	727	81.4	6.51	0	1
Medium	Q64291	Keratin, type I cytoskeletal 12 OS=Mus musculus OX=10090 GN=Krt12 PE=1 SV=2	1.429	2	1	1	1	1	487	52.4	4.82	0	1
Medium	Q6ZPZ3	Zinc finger CCCH domain-containing protein 4 OS=Mus musculus OX=10090 GN=Zc3h4 PE=1 SV=2	1.428	1	1	1	1	1	1304	140.9	6.27	0	1
Medium	E0CYH0	Female-lethal(2)D homolog OS=Mus musculus OX=10090 GN=Wtap PE=1 SV=1	1.417	2	1	1	1	1	396	44.2	5.25	0	1
Medium	Q4FK79	Signal sequence receptor subunit gamma OS=Mus musculus OX=10090 GN=Ssr3 PE=2 SV=1	1.416	8	1	1	1	1	185	21.1	9.61	0	1
Medium	Q8C9G3	Origin recognition complex subunit 1 OS=Mus musculus OX=10090 GN=Orc1 PE=2 SV=1	1.408	1	1	1	1	1	840	95.1	9.1	1.67	1
Medium	Q80W00	Serine/threonine-protein phosphatase 1 regulatory subunit 10 OS=Mus musculus OX=10090 GN=Ppp1r10 PE=1 SV=1	1.404	1	1	1	1	1	888	94.3	9.16	0	1
Medium	Q3TXH6	SWIB domain-containing protein OS=Mus musculus OX=10090 GN=Smarcd2 PE=2 SV=1	1.403	1	1	1	1	1	531	59.1	9.64	0	1
Medium	P62869	Elongin-B OS=Mus musculus OX=10090 GN=Elob PE=1 SV=1	1.339	8	1	1	1	1	118	13.2	5.01	0	1
Medium	J3QMK1	Shugoshin 2B OS=Mus musculus OX=10090 GN=Sgo2b PE=3 SV=1	1.335	1	1	1	1	1	1167	130.4	8.5	1.66	1
Medium	P27699-5	Isoform 5 of cAMP-responsive element modulator OS=Mus musculus OX=10090 GN=Crem	1.324	3	1	1	1	1	345	37.3	8.4	1.73	1
Medium	Q3TIU8	Uncharacterized protein OS=Mus musculus OX=10090 GN=Abce1 PE=2 SV=1	1.317	2	1	1	1	1	599	67.2	8.27	0	1
Medium	Q9Z0W3	Nuclear pore complex protein Nup160 OS=Mus musculus OX=10090 GN=Nup160 PE=1 SV=2	1.311	1	1	1	1	1	1402	158.1	5.52	0	1
Medium	Q9ERU9	E3 SUMO-protein ligase RanBP2 OS=Mus musculus OX=10090 GN=Ranbp2 PE=1 SV=2	1.306	0	1	1	1	1	3053	340.9	6.18	0	1
Medium	D3Z0K6	Round spermatid basic protein 1-like OS=Mus musculus OX=10090 GN=Rsbn1l PE=1 SV=1	1.295	1	1	1	1	1	821	91.7	8.95	0	1
Medium	Q5FWX9	Solute carrier family 13 (Sodium/sulfate symporters), member 4 OS=Mus musculus OX=10090 GN=Slc13a4 PE=2 SV=1	1.285	4	1	1	1	1	625	68.9	7.53	2.45	1
Medium	G3X963	ATPase family AAA domain-containing protein 2 OS=Mus musculus OX=10090 GN=Atad2 PE=1 SV=1	1.284	1	1	1	1	1	1364	155.2	7.2	0	1
Medium	A2AP82	Transcription initiation factor TFIID subunit 9B OS=Mus musculus OX=10090 GN=Taf9b PE=1 SV=1	1.283	3	1	1	1	1	293	32	5.43	0	1
Medium	A0A158RFV1	Ribonucleoprotein, PTB-binding 1 OS=Mus musculus OX=10090 GN=Raver1 PE=2 SV=1	1.267	2	1	1	1	1	748	79.3	8.72	1.68	1
Medium	D3Z4J3	Unconventional myosin-Va OS=Mus musculus OX=10090 GN=Myo5a PE=1 SV=1	1.258	1	1	1	1	1	1855	215.4	8.5	0	1
Medium	Q8BG13	RNA-binding protein 3 OS=Mus musculus OX=10090 GN=Rbm3 PE=1 SV=1	1.255	12	1	1	1	1	154	16.8	8.38	0	1
Medium	Q9JJD0	THAP domain-containing protein 11 OS=Mus musculus OX=10090 GN=Thap11 PE=1 SV=1	1.255	3	1	1	1	1	305	33.3	8.82	0	1
Medium	Q8BJ90	Zinc finger protein 771 OS=Mus musculus OX=10090 GN=Znf771 PE=2 SV=1	1.238	3	1	1	1	1	317	35.7	8.82	1.64	1
Medium	Q62425	Cytochrome c oxidase subunit NDUFA4 OS=Mus musculus OX=10090 GN=Ndufa4 PE=1 SV=2	1.222	15	1	1	1	1	82	9.3	9.52	0	1
Medium	Q3TF62	Uncharacterized protein OS=Mus musculus OX=10090 GN=Actl6a PE=2 SV=1	1.213	2	1	1	1	1	429	47.5	5.5	0	1
Medium	P12968	Islet amyloid polypeptide OS=Mus musculus OX=10090 GN=Iapp PE=3 SV=1	1.2	8	1	1	1	1	93	10	10.17	1.61	1
Medium	H3BKF8	Homeobox-containing protein 1 (Fragment) OS=Mus musculus OX=10090 GN=Hmbox1 PE=1 SV=2	1.174	2	1	1	1	1	445	50	5.76	1.72	1
Medium	D3YWS8	Leukocyte receptor cluster member 8 homolog OS=Mus musculus OX=10090 GN=Leng8 PE=1 SV=1	1.157	1	1	1	1	1	801	88.4	9.16	0	1
Medium	K7TGT6	IgA heavy chain variable region (Fragment) OS=Mus musculus OX=10090 PE=2 SV=1	1.144	6	1	1	1	1	109	11.7	8.46	2.12	1
Medium	Q8K1S5	Krueppel-like factor 11 OS=Mus musculus OX=10090 GN=Klf11 PE=2 SV=3	1.133	3	1	1	1	1	502	54	8.47	0	1
Medium	P61620	Protein transport protein Sec61 subunit alpha isoform 1 OS=Mus musculus OX=10090 GN=Sec61a1 PE=1 SV=2	1.127	2	1	1	1	1	476	52.2	8.06	0	1
Medium	E9Q8V6	DENN/MADD domain-containing 4A OS=Mus musculus OX=10090 GN=Dennd4a PE=1 SV=1	1.123	0	1	1	1	1	1869	209.2	7.56	0	1
Medium	O08807	Peroxiredoxin-4 OS=Mus musculus OX=10090 GN=Prdx4 PE=1 SV=1	1.11	3	1	1	1	1	274	31	7.15	0	1
Medium	D3YY86	Zinc finger MYND domain-containing protein 11 OS=Mus musculus OX=10090 GN=Zmynd11 PE=1 SV=1	1.109	1	1	1	1	1	618	72	8.44	0	1
Medium	Q3TYK4	Uncharacterized protein OS=Mus musculus OX=10090 GN=Prkar1a PE=2 SV=1	1.104	2	1	1	1	1	510	57.2	6.89	0	1
Medium	Q70FJ1	A-kinase anchor protein 9 OS=Mus musculus OX=10090 GN=Akap9 PE=1 SV=2	1.103	0	1	1	1	1	3797	435.9	5.03	0	1
Medium	Q5RL51	Glutathione S-transferase C-terminal domain-containing protein OS=Mus musculus OX=10090 GN=Gstcd PE=2 SV=1	1.098	2	1	1	1	1	634	70.6	7.61	2.44	1
Medium	P42669	Transcriptional activator protein Pur-alpha OS=Mus musculus OX=10090 GN=Pura PE=1 SV=1	1.096	2	1	1	1	1	321	34.9	6.44	0	1
Medium	A0A0R5RP39	Sodium channel protein OS=Mus musculus OX=10090 GN=Scn11a PE=2 SV=1	1.08	1	1	3	1	1	1765	201.2	8.29	1.65	1
Medium	Q62504	Msx2-interacting protein OS=Mus musculus OX=10090 GN=Spen PE=1 SV=2	1.075	0	1	1	1	1	3644	398.5	8.54	2.24	1
Medium	A0A087WPM0	Selenoprotein H OS=Mus musculus OX=10090 GN=Selenoh PE=1 SV=1	1.065	7	1	1	1	1	123	13.5	9.45	0	1
Medium	Q3UM18	Large subunit GTPase 1 homolog OS=Mus musculus OX=10090 GN=Lsg1 PE=1 SV=2	1.061	2	1	1	1	1	644	73.1	6.51	1.66	1
Medium	Q3TZX8	Polynucleotide 5'-hydroxyl-kinase NOL9 OS=Mus musculus OX=10090 GN=Nol9 PE=1 SV=1	1.061	1	1	1	1	1	714	80.8	9.45	0	1
Medium	Q5SUH6	Clathrin interactor 1 OS=Mus musculus OX=10090 GN=Clint1 PE=1 SV=1	1.06	1	1	1	1	1	641	69.7	6.65	0	1
Medium	Q3UJV2	F-actin-capping protein subunit alpha OS=Mus musculus OX=10090 GN=Capza1 PE=2 SV=1	1.059	3	1	1	1	1	290	33.3	6.74	0	1
Medium	Q91WR3-3	Isoform 3 of Activating signal cointegrator 1 complex subunit 2 OS=Mus musculus OX=10090 GN=Ascc2	1.055	1	1	1	1	1	769	87.7	4.93	1.67	1
Medium	A0A3B0INZ4	Adiponectin b OS=Mus musculus OX=10090 GN=Adib PE=4 SV=1	1.054	4	1	1	1	1	276	29.3	8.69	0	1
Medium	Q8C570	mRNA export factor OS=Mus musculus OX=10090 GN=Rae1 PE=1 SV=1	1.051	2	1	1	1	1	368	40.9	7.83	0	1
Medium	Q9D823	60S ribosomal protein L37 OS=Mus musculus OX=10090 GN=Rpl37 PE=1 SV=3	1.041	6	1	1	1	1	97	11.1	11.74	0	1
Medium	P62274	40S ribosomal protein S29 OS=Mus musculus OX=10090 GN=Rps29 PE=1 SV=2	1.036	13	1	2	1	1	56	6.7	10.13	1.62	1
Medium	A0A0E4B366	MAb 44B1 heavy chain OS=Mus musculus OX=10090 GN=HC PE=2 SV=1	1.03	1	1	1	1	1	472	51.8	8.35	1.9	1
Medium	Q99PU8-3	Isoform 3 of ATP-dependent RNA helicase DHX30 OS=Mus musculus OX=10090 GN=Dhx30	1.024	1	1	1	1	1	1223	136.4	8.44	0	1
Medium	Q571G2	Ribosomal RNA-processing protein 43 (Fragment) OS=Mus musculus OX=10090 GN=Exosc8 PE=2 SV=1	1.013	3	1	1	1	1	308	33.2	5.58	0	1
Medium	Q3UT19	Pre-mRNA-splicing factor 3 OS=Mus musculus OX=10090 GN=Prpf3 PE=2 SV=1	1.008	1	1	1	1	1	683	77.2	9.57	0	1
Medium	Q3UKX3	Uncharacterized protein (Fragment) OS=Mus musculus OX=10090 GN=Stau1 PE=2 SV=1	1.008	2	1	1	1	1	592	65.1	9.83	0	1
Medium	Q5SXG9	Acetylcholine receptor subunit epsilon OS=Mus musculus OX=10090 GN=Chrne PE=3 SV=1	0.994	5	1	1	1	1	494	55	5.05	0	1
Medium	E0CZB3	Ubiquitin-like protein 5 OS=Mus musculus OX=10090 GN=Ubl5 PE=1 SV=1	0.994	8	1	1	1	1	113	13	8.15	0	1
Medium	A7M7S6	Hemoglobin X, alpha-like embryonic chain in Hba complex (Fragment) OS=Mus musculus OX=10090 GN=Hba-x PE=1 SV=1	0.987	4	1	1	1	1	156	18	9.29	0	1
Medium	Q52KE7	Cyclin-L1 OS=Mus musculus OX=10090 GN=Ccnl1 PE=1 SV=1	0.986	2	1	1	1	1	532	60.1	10.7	0	1
Medium	Q9D4H9-2	Isoform 2 of PHD finger protein 14 OS=Mus musculus OX=10090 GN=Phf14	0.985	1	1	1	1	1	941	105.9	5.35	0	1
Medium	Q8QZY9	Splicing factor 3B subunit 4 OS=Mus musculus OX=10090 GN=Sf3b4 PE=1 SV=1	0.98	6	1	2	1	1	424	44.3	8.56	0	1
Medium	F8VPY2	Transcription initiation factor TFIID subunit 5 OS=Mus musculus OX=10090 GN=Taf5 PE=1 SV=1	0.978	1	1	1	1	1	801	86.9	5.64	1.6	1
Medium	Q8C5X6	Flap endonuclease 1 OS=Mus musculus OX=10090 GN=Fen1 PE=2 SV=1	0.976	1	1	1	1	1	411	45.8	8.24	0	1
Medium	Q3TIV2	Uncharacterized protein OS=Mus musculus OX=10090 GN=Zc3h11a PE=2 SV=1	0.976	1	1	1	1	1	792	86.4	8.22	0	1
Medium	Q497I3	Fatty acid binding protein 5, epidermal OS=Mus musculus OX=10090 GN=Fabp5 PE=1 SV=1	0.975	7	1	1	1	1	135	15.1	6.54	1.82	1
Medium	A0A5F8MPW9	Paternally-expressed gene 3 protein OS=Mus musculus OX=10090 GN=Peg3 PE=1 SV=1	0.964	0	1	1	1	1	1632	185.6	5.5	0	1
Medium	G5E849	Urea transporter 2 OS=Mus musculus OX=10090 GN=Slc14a2 PE=1 SV=1	0.958	3	1	1	1	1	930	102.1	7.27	2.57	1
Medium	P83877	Thioredoxin-like protein 4A OS=Mus musculus OX=10090 GN=Txnl4a PE=1 SV=1	0.957	8	1	1	1	1	142	16.8	5.85	0	1
Medium	Q8BWC8	Uncharacterized protein OS=Mus musculus OX=10090 PE=2 SV=1	0.95	7	1	1	1	1	162	17.4	5.33	2.15	1
Medium	Q921Y2	U3 small nucleolar ribonucleoprotein protein IMP3 OS=Mus musculus OX=10090 GN=Imp3 PE=2 SV=1	0.95	8	1	1	1	1	184	21.8	9.5	2.08	1
Medium	A0A1S6GWH8	Nuclear cap-binding protein subunit 2 OS=Mus musculus OX=10090 GN=Ncbp2 PE=2 SV=1	0.949	6	1	1	1	1	195	22.7	8.41	0	1
Medium	Q62481	Vacuolar protein sorting-associated protein 72 homolog OS=Mus musculus OX=10090 GN=Vps72 PE=2 SV=2	0.949	2	1	1	1	1	368	40.8	6.4	0	1
Medium	A0A140T8N8	Immunoglobulin kappa variable 9-123 (Fragment) OS=Mus musculus OX=10090 GN=Igkv9-123 PE=4 SV=2	0.945	14	1	2	1	1	117	12.8	6.54	1.79	1
Medium	A2BDX3	Adenylyltransferase and sulfurtransferase MOCS3 OS=Mus musculus OX=10090 GN=Mocs3 PE=1 SV=1	0.942	2	1	1	1	1	460	49.3	7.49	0	1
