# Supplementary material for: Exploring Transcriptional Regulation of Beta Cell SASP by Brd4-Associated Proteins and Cell Cycle Control Protein p21
Source: Epigenomes. 2024 Mar 6;8(1):10. doi: 10.3390/epigenomes8010010 (PMC10968907; doi:10.3390/epigenomes8010010)
Supplement: Supplementary file 1 [file epigenomes-08-00010-s001.zip › Table S2.xlsx]

## Sheet: Sheet1
Gene target	Forward	Reverse
Cdkn1a	GAACATCTCAGGGCCGAAAA	TGCGCTTGGAGTGATAGAAATC
Ino80	AGCAAGCAGTTCTGGGTTGT	GCCACTTTCTGCTTTTCTTCA
Gapdh	CGGCCGCATCTTCTTGTG	GTGACCAGGCGCCCAATA
Ppia	GGGTTCCTCCTTTCACAGAA	GATGCCAGGACCTGTATGCT
Igfbp3	CAAAGCACAGACACCCAGAA	TGTCACAGTTTGGGATGTGG
Serpine1	TGATGGCTCAGAGCAACAAG	GGCAGTTCCACAACGTCATA
